# Supplementary material for: Selective Pd-catalyzed α- and β-arylations of the furan rings of (ortho-bromophenyl)furan-2-yl-methanones: C(CO)–C bond cleavage with a furan ring as a leaving group and synthesis of furan-derived fluorenones
Source: Royal Society of Chemistry journal article supplement (doi:10.1039/c6qo00277c), 2016-01-01

# Selective Pd-catalyzed $\alpha$ - and $\beta$ -Arylations of the Furan Rings of (*ortho*-Bromophenyl)furan-2-yl-methanones: C(CO)–C Bond Cleavage with a Furan Ring as a Leaving Group and Synthesis of Furan-derived Fluorenones

Xiaoting Zhang, Jianchao Liu,<sup>a</sup> Yongjie Yang,<sup>a</sup> Furong Wang,<sup>a</sup> Huanfeng Jiang,<sup>a</sup> and BiaoLin Yin<sup>a\*</sup>

<sup>a</sup> School of Chemistry and Chemical Engineering, South China University of Technology, Guangzhou 510640, P.R China

Fax: (+ 86)-20-8711-3735; phone: (+86)-20-8711-3735; e-mail: [blyin@scut.edu.cn](mailto:blyin@scut.edu.cn)

| Content                                         | Page |
|-------------------------------------------------|------|
| General experimental details                    | 2    |
| Preparation of <b>1</b>                         | 2    |
| General Procedure for the synthesis of <b>3</b> | 3    |
| General Procedure for the synthesis of <b>4</b> | 3    |
| Characterization of <b>1</b>                    | 3    |
| Characterization of <b>4</b>                    | 7    |
| Characterization of <b>3</b>                    | 13   |
| Spectra of all the new compounds                | 15   |

### General Experimental Details.

IR spectra were recorded with FT-IR as a thin film or using KBr pellets and were expressed in  $\text{cm}^{-1}$ .  $^1\text{H}$  (400 MHz) and  $^{13}\text{C}$  (100 MHz) NMR spectra were recorded using  $\text{CDCl}_3$  as a solvent. Chemical shifts were reported in ppm downfield to tetramethylsilane. Coupling constants were reported and expressed in Hz; splitting patterns were designated as s (singlet), d (doublet), t (triplet), q (quartet), m (multiplet), dd (double doublet), dt (double triplet), dq (double quartet). Infrared (IR) spectra were obtained on a Bruker Vector 22 spectrometer. Mass spectra were obtained from high resolution ESI mass spectrometer. All reactions were carried out using freshly distilled and dry solvents. Column chromatography was performed over silica gel (100-200 Mesh) using petroleum ether /ethyl acetate as the eluent.

### General Procedure for the synthesis of 1a-c, 1j-l, 1r

To a stirred mixture of furans (8.0 mmol) and dry THF (20 mL) was added *n*-BuLi (3.2 mL, 2.5 M, 8.0 mmol) dropwise at  $-10\text{ }^\circ\text{C}$ . After the stirring of the reaction mixture for 2 h at the same temperature, the aldehyde (4.0 mmol) was added. The reaction was allowed to warm to room temperature over 2.5 h then was quenched with saturated aqueous  $\text{NH}_4\text{Cl}$  (10 mL). The resulting mixture was extracted with EtOAc ( $3 \times 10$  mL). The combined organic layers were dried over  $\text{Na}_2\text{SO}_4$ , filtered and then concentrated *in vacuo*. The residue was submitted to the next step without further purification.

To the solution of the above-made residue in dry DCM (30 mL) was added  $\text{MnO}_2$  (2.61 g, 30 mmol) at room temperature. After 24 h vigorous stirring at the same temperature, the reaction mixture was filtered through a pad of celite and concentrated *in vacuo*. The residue was purified by flash chromatography over silica gel (ethyl acetate/petroleum ether = 1:30) to afford the desired product.

### General Procedure for the synthesis of 1d-h, 1m-p

2-Phenylfuran or 2-benzylfuran (3.0 mmol) was added to a stirred mixture of ZnO (powder, 243.9 mg, 3.0 mmol) and acid chloride (3.6 mmol) at room temperature. The reaction mixture was kept at this temperature with stirring for a certain period of time as required to complete the reaction (monitored by TLC). The reaction mixture was filtered through a pad of celite and eluted with DCM. The filtrate was washed with saturated  $\text{NaHCO}_3$  and dried over  $\text{Na}_2\text{SO}_4$ . Evaporation

of the solvent furnished the crude product which was purified by flash column chromatography (ethyl acetate/petroleum ether = 1:20) to afford the desired product.

#### **General Procedure for the synthesis of 3**

**1** (0.5 mmol), Pd(OAc)<sub>2</sub> (2.3 mg, 0.01 mmol), PCy<sub>3</sub>·HBF<sub>4</sub> (14.7 mg, 0.04 mmol), and K<sub>2</sub>CO<sub>3</sub> (138.0 mg, 1.0 mmol) were suspended in mesitylene (5 mL) in a Schlenk tube under nitrogen. The reaction mixture was then vigorously stirred at 150 °C for 6 h. After cooling to room temperature, H<sub>2</sub>O (10 mL) then was added to the reaction mixture. The resulting mixture was extracted with AcOEt (3 × 10 mL). The combined organic layers were washed with brine, dried over Na<sub>2</sub>SO<sub>4</sub>, filtered, and evaporated under reduced pressure. The residue was purified by flash chromatography over silica gel (ethyl acetate/petroleum ether = 1/60) to afford **3**.

#### **General Procedure for the synthesis of 4**

**1** (0.5 mmol), Pd(OAc)<sub>2</sub> (11.2 mg, 0.05 mmol), PPh<sub>3</sub> (26.2 mg, 0.1 mmol), KO<sup>t</sup>Bu (84.2 mg, 0.75 mmol), KCl (93.2 mg, 1.25 mmol) were suspended in PhMe (5 mL) in a Schlenk tube under nitrogen. The mixture was stirred at 80 °C for 18 h. After cooling to room temperature, the reaction mixture was added H<sub>2</sub>O (10 mL). The resulting mixture was extracted with AcOEt (3 × 10 mL). The combined organic extracts were washed with brine, dried over Na<sub>2</sub>SO<sub>4</sub>, filtered and concentrated under reduced pressure. The crude product was purified by flash chromatography (ethyl acetate/petroleum ether = 1/50) to obtain **4**.

#### **Procedure for one-pot synthesis of 3e, 3f, 3h and 3s from 1b**

**1b** (100 mg, 0.4 mmol), Pd(OAc)<sub>2</sub> (2.3 mg, 0.01 mmol), PCy<sub>3</sub>·HBF<sub>4</sub> (14.7 mg, 0.04 mmol), K<sub>2</sub>CO<sub>3</sub> (138.0 mg, 1.0 mmol) were suspended in mesitylene (3 mL) in a Schlenk tube under nitrogen. The mixture was stirred at 80 °C for 6 hours. After cooling to room temperature, the reaction mixture was added aryl bromide (0.48 mmol) under nitrogen atmosphere. The reaction mixture was stirred for additional 6 hours. After cooling to room temperature, the reaction mixture was added H<sub>2</sub>O (10 mL). The resulting mixture was extracted with AcOEt (3 × 10 mL). The combined organic extracts were washed with brine, dried over Na<sub>2</sub>SO<sub>4</sub>, filtered and concentrated under reduced pressure. The crude product was purified by flash chromatography (ethyl acetate/petroleum ether = 1:60) to obtain **3n-3p** and **3s**.

## Characterization of 1

(2-Bromophenyl)(5-methylfuran-2-yl)methanone (**1a**). Yellow oil (713 mg, 74%); IR (KBr): 2960, 2926, 1656, 1586, 1512, 1436, 1370, 1214, 1024, 748  $\text{cm}^{-1}$ ;  $^1\text{H}$  NMR (400 MHz,  $\text{CDCl}_3$ )  $\delta$  7.63 (d,  $J = 7.8$  Hz, 1H), 7.38 (q,  $J = 7.2$  Hz, 2H), 7.32 (t,  $J = 7.3$  Hz, 1H), 6.86 (d,  $J = 2.1$  Hz, 1H), 6.18 (d,  $J = 2.1$  Hz, 1H), 2.43 (s, 3H);  $^{13}\text{C}$  NMR (100 MHz,  $\text{CDCl}_3$ )  $\delta$  181.9, 160.0, 150.5, 139.7, 133.4, 131.3, 129.1, 127.0, 124.3, 119.9, 109.6, 14.2; HRMS (ESI)  $m/z$  calcd for  $\text{C}_{12}\text{H}_9\text{BrNaO}_2$  [ $\text{M} + \text{Na}$ ] $^+$  286.9678, found 286.9682.

(2-Bromophenyl)(furan-2-yl)methanone (**1b**). Yellow oil (660 mg, 70%); IR (KBr): 3120, 1660, 1587, 1562, 1463, 1430, 1189, 1022, 749  $\text{cm}^{-1}$ ;  $^1\text{H}$  NMR (400 MHz,  $\text{CDCl}_3$ )  $\delta$  7.68 (s, 1H), 7.66 – 7.60 (m, 1H), 7.44 – 7.37 (m, 2H), 7.37 – 7.31 (m, 1H), 7.07 – 6.98 (m, 1H), 6.59 – 6.53 (m, 1H);  $^{13}\text{C}$  NMR (100 MHz,  $\text{CDCl}_3$ )  $\delta$  182.7, 151.8, 148.0, 139.5, 133.4, 131.6, 129.1, 127.1, 121.6, 119.9, 112.6; HRMS (ESI)  $m/z$  calcd for  $\text{C}_{11}\text{H}_7\text{BrNaO}_2$  [ $\text{M} + \text{Na}$ ] $^+$  272.9522, found 272.9520.

(2-Bromophenyl)(5-ethylfuran-2-yl)methanone (**1c**). Yellow oil (767 mg, 75%); IR (KBr): 2977, 2929, 1651, 1579, 1507, 1457, 1421, 1314, 1203, 1024, 747  $\text{cm}^{-1}$ ;  $^1\text{H}$  NMR (400 MHz,  $\text{CDCl}_3$ )  $\delta$  7.63 (d,  $J = 7.8$  Hz, 1H), 7.43 – 7.35 (m, 2H), 7.35 – 7.29 (m, 1H), 6.88 (d,  $J = 3.5$  Hz, 1H), 6.19 (d,  $J = 3.5$  Hz, 1H), 2.77 (q,  $J = 7.6$  Hz, 2H), 1.30 (t,  $J = 7.6$  Hz, 3H);  $^{13}\text{C}$  NMR (100 MHz,  $\text{CDCl}_3$ )  $\delta$  182.0, 165.4, 150.3, 139.8, 133.3, 131.3, 129.1, 127.0, 124.1, 119.9, 107.9, 21.9, 11.7; HRMS (ESI)  $m/z$  calcd for  $\text{C}_{13}\text{H}_{11}\text{BrNaO}_2$  [ $\text{M} + \text{Na}$ ] $^+$  300.9835, found 300.9837.

(5-Benzylfuran-2-yl)(2-bromophenyl)methanone (**1d**). Yellow oil (867 mg, 85%); IR (KBr): 2923, 2862, 1652, 1505, 1465, 1311, 1266, 1024, 743  $\text{cm}^{-1}$ ;  $^1\text{H}$  NMR (400 MHz,  $\text{CDCl}_3$ )  $\delta$  7.62 (d,  $J = 7.8$  Hz, 1H), 7.39 (t,  $J = 7.1$  Hz, 2H), 7.36 – 7.30 (m, 3H), 7.27 (d,  $J = 7.2$  Hz, 3H), 6.89 (d,  $J = 3.3$  Hz, 1H), 6.14 (d,  $J = 3.4$  Hz, 1H), 4.07 (s, 2H);  $^{13}\text{C}$  NMR (100 MHz,  $\text{CDCl}_3$ )  $\delta$  182.1, 162.3, 150.8, 139.7, 136.2, 133.4, 131.4, 129.2, 129.0, 128.8, 127.1, 127.0, 124.0, 120.0, 109.8, 35.0; HRMS (ESI)  $m/z$  calcd for  $\text{C}_{18}\text{H}_{13}\text{BrNaO}_2$  [ $\text{M} + \text{Na}$ ] $^+$  362.9991, found 362.9997.

(2-Bromophenyl)(5-phenylfuran-2-yl)methanone (**1e**). Yellow oil (782 mg, 80%); IR (KBr): 2924, 2846, 1649, 1515, 1471, 1370, 1314, 1267, 1027, 763, 746, 691  $\text{cm}^{-1}$ ;  $^1\text{H}$  NMR (400 MHz,  $\text{CDCl}_3$ )  $\delta$  7.79 (d,  $J = 7.1$  Hz, 2H), 7.66 (d,  $J = 7.8$  Hz, 1H), 7.49 – 7.44 (m, 1H), 7.43 – 7.32 (m, 5H), 7.07 (d,  $J = 3.7$  Hz, 1H), 6.80 (d,  $J = 3.7$  Hz, 1H);  $^{13}\text{C}$  NMR (100 MHz,  $\text{CDCl}_3$ )  $\delta$  182.1, 159.5, 150.7, 139.7, 133.4, 131.5, 129.6, 129.3, 129.1, 128.9, 127.1, 125.3, 124.3, 120.0, 107.8; HRMS (ESI)  $m/z$  calcd for  $\text{C}_{17}\text{H}_{11}\text{BrNaO}_2$  [ $\text{M} + \text{Na}$ ] $^+$  348.9835, found 348.9838.

(2-Bromophenyl)(5-(*p*-tolyl)furan-2-yl)methanone (**1f**). Yellow oil (877 mg, 86%); IR (KBr): 2929, 1648, 1525, 1478, 1369, 1270, 1027, 799, 746 cm<sup>-1</sup>; <sup>1</sup>H NMR (400 MHz, CDCl<sub>3</sub>) δ 7.69 (d, *J* = 7.5 Hz, 2H), 7.65 (d, *J* = 7.9 Hz, 1H), 7.46 (d, *J* = 7.4 Hz, 1H), 7.40 (t, *J* = 7.4 Hz, 1H), 7.34 (t, *J* = 7.6 Hz, 1H), 7.23 (s, 1H), 7.21 (s, 1H), 7.05 (d, *J* = 3.1 Hz, 1H), 6.74 (d, *J* = 3.1 Hz, 1H), 2.38 (s, 3H); <sup>13</sup>C NMR (100 MHz, CDCl<sub>3</sub>) δ 182.0, 159.9, 150.4, 139.9, 139.8, 133.4, 131.4, 129.6, 129.3, 127.1, 126.4, 125.3, 124.6, 120.1, 107.2, 21.5; HRMS (ESI) *m/z* calcd for C<sub>18</sub>H<sub>13</sub>BrNaO<sub>2</sub> [M + Na]<sup>+</sup> 362.9991, found 362.9995.

(2-Bromophenyl)(5-(*o*-tolyl)furan-2-yl)methanone (**1g**). Yellow oil (765 mg, 75%); IR (KBr): 2931, 1652, 1510, 1463, 1368, 1252, 1029, 762 cm<sup>-1</sup>; <sup>1</sup>H NMR (400 MHz, CDCl<sub>3</sub>) δ 7.80 (d, *J* = 6.7 Hz, 1H), 7.68 (d, *J* = 7.9 Hz, 1H), 7.50 (d, *J* = 7.5 Hz, 1H), 7.43 (t, *J* = 7.4 Hz, 1H), 7.37 (t, *J* = 7.6 Hz, 1H), 7.29 (d, *J* = 6.4 Hz, 3H), 7.17 (d, *J* = 3.1 Hz, 1H), 6.75 (d, *J* = 3.1 Hz, 1H), 2.53 (s, 3H); <sup>13</sup>C NMR (100 MHz, CDCl<sub>3</sub>) δ 182.3, 159.4, 150.6, 139.9, 136.0, 133.4, 131.6, 131.5, 129.4, 129.2, 128.5, 128.2, 127.1, 126.3, 123.3, 120.0, 111.1, 21.9; HRMS (ESI) *m/z* calcd for C<sub>18</sub>H<sub>13</sub>BrNaO<sub>2</sub> [M + Na]<sup>+</sup> 362.9991, found 362.9993.

(2-Bromophenyl)(5-(4-fluorophenyl)furan-2-yl)methanone (**1h**). Yellow oil (877 mg, 85%); IR (KBr): 3076, 1646, 1599, 1526, 1475, 1228, 1028, 841, 799, 758 cm<sup>-1</sup>; <sup>1</sup>H NMR (400 MHz, CDCl<sub>3</sub>) δ 7.81 – 7.72 (m, 2H), 7.65 (d, *J* = 7.7 Hz, 1H), 7.46 (d, *J* = 7.2 Hz, 1H), 7.41 (t, *J* = 7.4 Hz, 1H), 7.38 – 7.31 (m, 1H), 7.15 – 7.07 (m, 2H), 7.05 (br, 1H), 6.74 (d, *J* = 3.4 Hz, 1H); <sup>13</sup>C NMR (100 MHz, CDCl<sub>3</sub>) δ 182.0, 163.5 (d, *J*<sub>CF</sub> = 249.3 Hz), 158.5, 150.7, 139.7, 133.4, 131.5, 129.2, 127.3 (d, *J*<sub>CF</sub> = 8.4 Hz), 127.1, 125.5 (d, *J*<sub>CF</sub> = 3.3 Hz), 124.3, 120.0, 116.1 (d, *J*<sub>CF</sub> = 22.0 Hz), 107.5; HRMS (ESI) *m/z* calcd for C<sub>17</sub>H<sub>10</sub>BrFNaO<sub>2</sub> [M + Na]<sup>+</sup> 366.9740, found 366.9741.

Methyl 5-(2-bromobenzoyl)furan-2-carboxylate (**1i**). White solid (505 mg, 82%); mp 72.1 – 72.2 °C; IR (KBr): 2955, 1737, 1666, 1568, 1511, 1433, 1283, 1025, 762 cm<sup>-1</sup>; <sup>1</sup>H NMR (400 MHz, CDCl<sub>3</sub>) δ 7.65 (d, *J* = 7.6 Hz, 1H), 7.48 – 7.34 (m, 3H), 7.25 (d, *J* = 2.3 Hz, 1H), 7.08 (d, *J* = 2.3 Hz, 1H), 3.92 (s, 3H); <sup>13</sup>C NMR (100 MHz, CDCl<sub>3</sub>) δ 183.0, 158.5, 152.9, 147.6, 138.7, 133.6, 132.1, 129.4, 127.3, 120.9, 120.0, 118.7, 52.5; HRMS (ESI) *m/z* calcd for C<sub>13</sub>H<sub>9</sub>BrNaO<sub>4</sub> [M + Na]<sup>+</sup> 330.9576, found 330.9580.

(2-Bromophenyl)(5-methyl-4-(methylthio)furan-2-yl)methanone (**1j**). Yellow oil (865 mg, 77%); IR (KBr): 2989, 2921, 2834, 1660, 1586, 1510, 1466, 1429, 1351, 1313, 1195, 1048, 747 cm<sup>-1</sup>; <sup>1</sup>H NMR (400 MHz, CDCl<sub>3</sub>) δ 7.64 (d, *J* = 7.6 Hz, 1H), 7.42 – 7.38 (m, 2H), 7.38 – 7.31 (m, 1H),

6.93 (s, 1H), 2.45 (s, 3H), 2.28 (s, 3H);  $^{13}\text{C}$  NMR (100 MHz,  $\text{CDCl}_3$ )  $\delta$  181.7, 160.3, 149.7, 139.4, 133.4, 131.5, 129.1, 127.1, 126.4, 119.9, 117.2, 19.0, 12.6; HRMS (ESI)  $m/z$  calcd for  $\text{C}_{13}\text{H}_{11}\text{BrNaO}_2\text{S} [\text{M} + \text{Na}]^+$  332.9555, found 332.9563.

*Benzofuran-2-yl(2-bromophenyl)methanone (1k)*. White oil (756 mg, 63%); IR (KBr): 3063, 2928, 1662, 1612, 1588, 1549, 1471, 1432, 1219, 1026, 749  $\text{cm}^{-1}$ ;  $^1\text{H}$  NMR (400 MHz,  $\text{CDCl}_3$ )  $\delta$  7.67 (s, 1H), 7.65 (s, 1H), 7.62 – 7.56 (m, 1H), 7.52 – 7.34 (m, 4H), 7.33 – 7.27 (m, 2H);  $^{13}\text{C}$  NMR (100 MHz,  $\text{CDCl}_3$ )  $\delta$  184.6, 156.4, 151.7, 139.4, 133.5, 131.9, 129.3, 129.0, 127.2, 127.0, 124.2, 123.6, 120.0, 118.0, 112.7; HRMS (ESI)  $m/z$  calcd for  $\text{C}_{15}\text{H}_9\text{BrNaO}_2 [\text{M} + \text{Na}]^+$  322.9678, found 322.9684.

*(2-Bromo-4-methylphenyl)(5-methylfuran-2-yl)methanone (1l)*. Yellow oil (792 mg, 76%); IR (KBr): 2925, 2856, 1713, 1649, 1602, 1512, 1447, 1381, 1309, 1211, 1027, 761  $\text{cm}^{-1}$ ;  $^1\text{H}$  NMR (400 MHz,  $\text{CDCl}_3$ )  $\delta$  7.45 (s, 1H), 7.30 (d,  $J = 7.7$  Hz, 1H), 7.16 (d,  $J = 7.7$  Hz, 1H), 6.86 (d,  $J = 3.5$  Hz, 1H), 6.17 (d,  $J = 3.4$  Hz, 1H), 2.42 (s, 3H), 2.38 (s, 3H);  $^{13}\text{C}$  NMR (100 MHz,  $\text{CDCl}_3$ )  $\delta$  182.0, 159.7, 150.7, 142.0, 136.8, 133.9, 129.1, 127.7, 124.0, 119.9, 109.4, 21.1, 14.2; HRMS (ESI)  $m/z$  calcd for  $\text{C}_{13}\text{H}_{11}\text{BrNaO}_2 [\text{M} + \text{Na}]^+$  300.9835, found 300.9835.

*(5-Benzylfuran-2-yl)(2-bromo-4-methylphenyl)methanone (1m)*. Yellow oil (913 mg, 86%); IR (KBr): 3030, 2921, 1653, 1602, 1507, 1452, 1384, 1310, 1206, 1024, 818, 762, 712  $\text{cm}^{-1}$ ;  $^1\text{H}$  NMR (400 MHz,  $\text{CDCl}_3$ )  $\delta$  7.43 (s, 1H), 7.33 – 7.22 (m, 6H), 7.16 – 7.10 (m, 1H), 6.84 (d,  $J = 3.5$  Hz, 1H), 6.07 (d,  $J = 3.5$  Hz, 1H), 4.04 (s, 2H), 2.35 (s, 3H);  $^{13}\text{C}$  NMR (100 MHz,  $\text{CDCl}_3$ )  $\delta$  182.2, 162.1, 151.0, 142.1, 136.7, 136.3, 133.9, 129.2, 129.0, 128.8, 127.7, 127.0, 123.6, 119.9, 109.7, 35.0, 21.1; HRMS (ESI)  $m/z$  calcd for  $\text{C}_{19}\text{H}_{15}\text{BrNaO}_2 [\text{M} + \text{Na}]^+$  377.0148, found 377.0156.

*(2-Bromo-4-methylphenyl)(5-phenylfuran-2-yl)methanone (1n)*. Yellow oil (816 mg, 80%); IR (KBr): 3061, 2922, 2850, 1649, 1602, 1565, 1516, 1474, 1373, 1269, 1029, 816, 763, 689  $\text{cm}^{-1}$ ;  $^1\text{H}$  NMR (400 MHz,  $\text{CDCl}_3$ )  $\delta$  7.77 (d,  $J = 7.3$  Hz, 2H), 7.46 (s, 1H), 7.41 – 7.32 (m, 4H), 7.17 (d,  $J = 7.7$  Hz, 1H), 7.05 (d,  $J = 3.7$  Hz, 1H), 6.78 (d,  $J = 3.7$  Hz, 1H), 2.35 (s, 3H);  $^{13}\text{C}$  NMR (100 MHz,  $\text{CDCl}_3$ )  $\delta$  182.2, 159.3, 150.9, 142.3, 136.8, 134.0, 129.5, 129.3, 129.2, 128.9, 127.8, 125.3, 124.0, 120.0, 107.7, 21.1; HRMS (ESI)  $m/z$  calcd for  $\text{C}_{18}\text{H}_{13}\text{BrNaO}_2 [\text{M} + \text{Na}]^+$  362.9991, found 362.9996.

*(2-Bromo-4-methylphenyl)(5-(o-tolyl)furan-2-yl)methanone (1o)*. Yellow oil (807 mg, 76%); IR (KBr): 2967, 2924, 2854, 1650, 1612, 1461, 1372, 1315, 1260, 1029, 802, 741  $\text{cm}^{-1}$ ;  $^1\text{H}$  NMR (400 MHz,  $\text{CDCl}_3$ )  $\delta$  7.77 (d,  $J = 6.9$  Hz, 1H), 7.48 (s, 1H), 7.37 (d,  $J = 7.7$  Hz, 1H), 7.30 – 7.23

(m, 3H), 7.19 (d,  $J = 7.7$  Hz, 1H), 7.13 (d,  $J = 2.4$  Hz, 1H), 6.70 (d,  $J = 2.4$  Hz, 1H), 2.50 (s, 3H), 2.38 (s, 3H);  $^{13}\text{C}$  NMR (100 MHz,  $\text{CDCl}_3$ )  $\delta$  182.4, 159.2, 150.8, 142.2, 136.9, 135.9, 133.9, 131.5, 129.3, 129.3, 128.6, 128.2, 127.8, 126.2, 123.1, 120.0, 111.0, 21.9, 21.1; HRMS (ESI)  $m/z$  calcd for  $\text{C}_{19}\text{H}_{15}\text{BrNaO}_2$   $[\text{M} + \text{Na}]^+$  377.0148, found 377.0153.

*(2-Bromo-4-methylphenyl)(5-(4-fluorophenyl)furan-2-yl)methanone (1p)*. Yellow oil (891 mg, 83%); IR (KBr): 2924, 2864, 1650, 1602, 1525, 1485, 1418, 1372, 1234, 1030, 815, 759  $\text{cm}^{-1}$ ;  $^1\text{H}$  NMR (400 MHz,  $\text{CDCl}_3$ )  $\delta$  7.81 – 7.73 (m, 2H), 7.49 (s, 1H), 7.37 (d,  $J = 7.7$  Hz, 1H), 7.20 (d,  $J = 7.7$  Hz, 1H), 7.15 – 7.07 (m, 2H), 7.06 (d,  $J = 3.6$  Hz, 1H), 6.74 (d,  $J = 3.6$  Hz, 1H), 2.40 (s, 3H);  $^{13}\text{C}$  NMR (100 MHz,  $\text{CDCl}_3$ )  $\delta$  182.2, 163.4 (d,  $J_{\text{CF}} = 249.2$  Hz), 158.3, 150.9, 142.3, 136.7, 134.0, 129.3, 127.8, 127.3 (d,  $J_{\text{CF}} = 8.4$  Hz), 125.6 (d,  $J_{\text{CF}} = 3.3$  Hz), 124.1, 120.0, 116.1 (d,  $J_{\text{CF}} = 22.0$  Hz), 107.4, 21.1; HRMS (ESI)  $m/z$  calcd for  $\text{C}_{18}\text{H}_{12}\text{BrFNaO}_2$   $[\text{M} + \text{Na}]^+$  380.9897, found 380.9901.

*(2-Bromo-4-fluorophenyl)(5-ethylfuran-2-yl)methanone (1r)*. Yellow oil (755 mg, 66%); IR (KBr): 2978, 2939, 1657, 1578, 1463, 1401, 1314, 1259, 1025, 828, 759  $\text{cm}^{-1}$ ;  $^1\text{H}$  NMR (400 MHz,  $\text{CDCl}_3$ )  $\delta$  7.62 – 7.54 (m, 1H), 7.19 – 7.11 (m, 1H), 7.11 – 7.02 (m, 1H), 6.95 (br, 1H), 6.23 (d,  $J = 2.6$  Hz, 1H), 2.78 (q,  $J = 7.5$  Hz, 2H), 1.30 (t,  $J = 7.6$  Hz, 3H);  $^{13}\text{C}$  NMR (100 MHz,  $\text{CDCl}_3$ )  $\delta$  180.4, 165.8, 161.3 (d,  $J_{\text{CF}} = 248.1$  Hz), 149.8, 141.2 (d,  $J_{\text{CF}} = 6.4$  Hz), 134.8 (d,  $J_{\text{CF}} = 7.7$  Hz), 124.4, 118.6 (d,  $J_{\text{CF}} = 22.2$  Hz), 116.4 (d,  $J_{\text{CF}} = 24.0$  Hz), 114.2 (d,  $J_{\text{CF}} = 3.5$  Hz), 108.2, 21.9, 11.6; HRMS (ESI)  $m/z$  calcd for  $\text{C}_{13}\text{H}_{10}\text{BrFNaO}_2$   $[\text{M} + \text{Na}]^+$  318.9740, found 318.9745.

#### Characterization of 4

*(5-Methylfuran-2-yl)(2-(5-methylfuran-2-yl)phenyl)methanone (4a)*. Yellow oil (36 mg, 55%); IR (KBr): 2923, 2854, 1654, 1592, 1511, 1440, 1367, 1310, 1211, 1023, 759  $\text{cm}^{-1}$ ;  $^1\text{H}$  NMR (400 MHz,  $\text{CDCl}_3$ )  $\delta$  7.69 (d,  $J = 7.9$  Hz, 1H), 7.48 (t,  $J = 7.6$  Hz, 1H), 7.41 (d,  $J = 7.6$  Hz, 1H), 7.30 (t,  $J = 7.5$  Hz, 1H), 6.70 (d,  $J = 3.0$  Hz, 1H), 6.37 (d,  $J = 3.1$  Hz, 1H), 6.05 (d,  $J = 3.0$  Hz, 1H), 5.92 (d,  $J = 3.0$  Hz, 1H), 2.36 (s, 3H), 2.21 (s, 3H);  $^{13}\text{C}$  NMR (100 MHz,  $\text{CDCl}_3$ )  $\delta$  184.9, 158.8, 152.6, 151.5, 150.0, 135.4, 130.1, 129.3, 128.4, 126.6, 126.2, 122.6, 109.7, 109.0, 107.8, 14.1, 13.5; HRMS (ESI)  $m/z$  calcd for  $\text{C}_{17}\text{H}_{15}\text{O}_3$   $[\text{M} + \text{H}]^+$  267.1016, found 267.1014.

*Furan-2-yl(2-(furan-2-yl)phenyl)methanone (4b)*. Yellow oil (32 mg, 54%); IR (KBr): 2926, 2853, 1657, 1598, 1564, 1499, 1462, 1223, 1018, 762  $\text{cm}^{-1}$ ;  $^1\text{H}$  NMR (400 MHz,  $\text{CDCl}_3$ )  $\delta$  7.73 (d,  $J =$

7.9 Hz, 1H), 7.57 (s, 1H), 7.53 (t,  $J = 7.6$  Hz, 1H), 7.47 (d,  $J = 7.6$  Hz, 1H), 7.38 (t,  $J = 7.5$  Hz, 1H), 7.33 (s, 1H), 6.85 (d,  $J = 2.9$  Hz, 1H), 6.49 (d,  $J = 2.9$  Hz, 1H), 6.43 (d,  $J = 1.3$  Hz, 1H), 6.34 (d,  $J = 1.3$  Hz, 1H);  $^{13}\text{C}$  NMR (100 MHz,  $\text{CDCl}_3$ )  $\delta$  185.3, 152.6, 151.8, 147.3, 142.8, 135.8, 130.4, 129.1, 128.4, 127.3, 126.9, 120.3, 112.2, 111.6, 108.6; HRMS (ESI)  $m/z$  calcd for  $\text{C}_{15}\text{H}_{10}\text{NaO}_3$   $[\text{M} + \text{Na}]^+$  261.0522, found 261.0523.

*(5-Ethylfuran-2-yl)(2-(5-ethylfuran-2-yl)phenyl)methanone (4c)*. Yellow oil (44 mg, 60%); IR (KBr): 2975, 2937, 1653, 1594, 1512, 1462, 1377, 1311, 1208, 1022, 760  $\text{cm}^{-1}$ ;  $^1\text{H}$  NMR (400 MHz,  $\text{CDCl}_3$ )  $\delta$  7.68 (d,  $J = 7.9$  Hz, 1H), 7.47 (t,  $J = 7.6$  Hz, 1H), 7.42 (d,  $J = 7.6$  Hz, 1H), 7.31 (t,  $J = 7.5$  Hz, 1H), 6.71 (br, 1H), 6.41 (br, 1H), 6.05 (br, 1H), 5.93 (br, 1H), 2.70 (q,  $J = 7.6$  Hz, 2H), 2.54 (q,  $J = 7.6$  Hz, 2H), 1.24 (t,  $J = 7.6$  Hz, 3H), 1.10 (t,  $J = 7.5$  Hz, 3H);  $^{13}\text{C}$  NMR (100 MHz,  $\text{CDCl}_3$ )  $\delta$  185.0, 164.1, 158.2, 151.3, 150.1, 135.5, 130.0, 129.3, 128.4, 126.6, 126.1, 122.3, 109.1, 107.4, 106.2, 21.7, 21.3, 12.0, 11.7; HRMS (ESI)  $m/z$  calcd for  $\text{C}_{19}\text{H}_{19}\text{O}_3$   $[\text{M} + \text{H}]^+$  295.1329, found 295.1327.

*(5-Benzylfuran-2-yl)(2-(5-benzylfuran-2-yl)phenyl)methanone (4d)*. Yellow oli (53 mg, 51%); IR (KBr): 2924, 2853, 1649, 1596, 1503, 1454, 1386, 1271, 1024, 761, 702  $\text{cm}^{-1}$ ;  $^1\text{H}$  NMR (400 MHz,  $\text{CDCl}_3$ )  $\delta$  7.65 (d,  $J = 7.9$  Hz, 1H), 7.46 (t,  $J = 7.6$  Hz, 1H), 7.40 (d,  $J = 7.6$  Hz, 1H), 7.33 – 7.23 (m, 6H), 7.20 (d,  $J = 7.5$  Hz, 3H), 7.12 (d,  $J = 7.3$  Hz, 2H), 6.69 (d,  $J = 3.0$  Hz, 1H), 6.39 (d,  $J = 3.1$  Hz, 1H), 5.96 (d,  $J = 3.3$  Hz, 1H), 5.91 (d,  $J = 3.0$  Hz, 1H), 3.97 (s, 2H), 3.80 (s, 2H);  $^{13}\text{C}$  NMR (100 MHz,  $\text{CDCl}_3$ )  $\delta$  185.0, 161.0, 155.1, 151.8, 150.7, 137.8, 136.5, 135.6, 130.1, 129.2, 128.9, 128.7, 128.7, 128.5, 128.4, 126.9, 126.8, 126.4, 126.4, 122.1, 109.5, 109.3, 108.4, 34.9, 34.5; HRMS (ESI)  $m/z$  calcd for  $\text{C}_{29}\text{H}_{22}\text{NaO}_3$   $[\text{M} + \text{Na}]^+$  441.1461, found 441.1459.

*(5-Phenylfuran-2-yl)(2-(5-phenylfuran-2-yl)phenyl)methanone (4e)*. Yellow oil (43 mg, 44%); IR (KBr): 2924, 2853, 1652, 1599, 1567, 1516, 1473, 1450, 1369, 1269, 1027, 761, 689  $\text{cm}^{-1}$ ;  $^1\text{H}$  NMR (400 MHz,  $\text{CDCl}_3$ )  $\delta$  7.79 (d,  $J = 7.9$  Hz, 1H), 7.71 (d,  $J = 7.5$  Hz, 2H), 7.59 – 7.47 (m, 4H), 7.43 – 7.31 (m, 4H), 7.24 (t,  $J = 7.5$  Hz, 2H), 7.15 (t,  $J = 7.3$  Hz, 1H), 6.94 (d,  $J = 2.8$  Hz, 1H), 6.66 (d,  $J = 2.8$  Hz, 1H), 6.63 (d,  $J = 3.5$  Hz, 1H), 6.57 (d,  $J = 3.1$  Hz, 1H);  $^{13}\text{C}$  NMR (100 MHz,  $\text{CDCl}_3$ )  $\delta$  184.9, 158.6, 154.3, 151.7, 151.3, 135.8, 130.3, 129.3, 129.2, 128.9, 128.8, 128.6, 128.5, 127.4, 127.2, 126.3, 125.2, 123.7, 122.8, 110.5, 107.5, 107.0; HRMS (ESI)  $m/z$  calcd for  $\text{C}_{27}\text{H}_{18}\text{NaO}_3$   $[\text{M} + \text{Na}]^+$  413.1148, found 413.1149.



*(5-(p-Tolyl)furan-2-yl)(2-(5-(p-tolyl)furan-2-yl)phenyl)methanone (4f)*. Yellow oil (47 mg, 45%); IR (KBr): 2924, 2853, 1650, 1601, 1510, 1468, 1367, 1253, 1032, 799, 761  $\text{cm}^{-1}$ ;  $^1\text{H}$  NMR (400 MHz,  $\text{CDCl}_3$ )  $\delta$  7.80 (d,  $J = 7.9$  Hz, 1H), 7.62 (d,  $J = 7.6$  Hz, 2H), 7.57 – 7.49 (m, 2H), 7.43 – 7.35 (m, 3H), 7.19 (d,  $J = 7.7$  Hz, 2H), 7.07 (d,  $J = 7.7$  Hz, 2H), 6.94 (br, 1H), 6.64 (d,  $J = 2.4$  Hz, 1H), 6.59 (d,  $J = 3.4$  Hz, 1H), 6.52 (d,  $J = 3.1$  Hz, 1H), 2.37 (s, 3H), 2.29 (s, 3H);  $^{13}\text{C}$  NMR (100 MHz,  $\text{CDCl}_3$ )  $\delta$  184.9, 159.0, 154.5, 151.5, 150.9, 139.5, 137.3, 135.8, 130.2, 129.5, 129.3, 129.0, 128.5, 127.6, 127.0, 126.6, 126.3, 125.2, 123.7, 12,3.0, 110.5, 106.9, 106.3, 21.4, 21.2; HRMS (ESI)  $m/z$  calcd for  $\text{C}_{29}\text{H}_{22}\text{NaO}_3$   $[\text{M} + \text{Na}]^+$  441.1461, found 441.1465.

*(5-(o-Tolyl)furan-2-yl)(2-(5-(o-tolyl)furan-2-yl)phenyl)methanone (4g)*. Yellow oil (49 mg, 47%); IR (KBr): 2957, 2926, 2857, 1658, 1599, 1566, 1510, 1478, 1310, 1252, 1032, 762  $\text{cm}^{-1}$ ;  $^1\text{H}$  NMR (400 MHz,  $\text{CDCl}_3$ )  $\delta$  7.81 (d,  $J = 7.9$  Hz, 1H), 7.64 (d,  $J = 7.5$  Hz, 1H), 7.58 – 7.48 (m, 3H), 7.39 (t,  $J = 7.5$  Hz, 1H), 7.21 (t,  $J = 7.1$  Hz, 3H), 7.13 (d,  $J = 3.5$  Hz, 3H), 7.02 (br, 1H), 6.66 (br, 1H), 6.56 (d,  $J = 2.2$  Hz, 1H), 6.50 (s, 1H), 2.41 (s, 3H), 2.39 (s, 3H);  $^{13}\text{C}$  NMR (100 MHz,  $\text{CDCl}_3$ )  $\delta$  185.0, 158.6, 153.8, 151.5, 150.9, 136.0, 135.8, 134.3, 131.3, 131.1, 130.3, 129.6, 129.1, 128.9, 128.7, 128.4, 128.2, 127.5, 127.2, 126.8, 126.6, 126.1, 126.0, 122.1, 110.8, 110.5, 21.9, 21.7; HRMS (ESI)  $m/z$  calcd for  $\text{C}_{29}\text{H}_{22}\text{NaO}_3$   $[\text{M} + \text{Na}]^+$  441.1461, found 441.1467.

*(5-(4-Fluorophenyl)furan-2-yl)(2-(5-(4-fluorophenyl)furan-2-yl)phenyl)methanone (4h)*. Yellow oil (60 mg, 56%); IR (KBr): 2925, 2854, 1650, 1600, 1485, 1416, 1234, 1028, 839, 761  $\text{cm}^{-1}$ ;  $^1\text{H}$  NMR (400 MHz,  $\text{CDCl}_3$ )  $\delta$  7.77 (d,  $J = 7.9$  Hz, 1H), 7.72 – 7.63 (m, 2H), 7.54 (dd,  $J = 15.4, 7.6$  Hz, 2H), 7.49 – 7.43 (m, 2H), 7.40 (t,  $J = 7.5$  Hz, 1H), 7.07 (t,  $J = 8.2$  Hz, 2H), 6.98 – 6.87 (m, 3H), 6.65 (d,  $J = 3.1$  Hz, 1H), 6.58 (d,  $J = 3.2$  Hz, 1H), 6.51 (d,  $J = 3.0$  Hz, 1H);  $^{13}\text{C}$  NMR (100 MHz,  $\text{CDCl}_3$ )  $\delta$  184.9, 163.3 (d,  $J_{\text{CF}} = 248.9$  Hz), 162.2 (d,  $J_{\text{CF}} = 246.1$  Hz), 157.6, 153.4, 151.7, 151.4, 135.7, 130.3, 128.8, 128.5, 127.4, 127.1 (d,  $J_{\text{CF}} = 8.3$  Hz), 126.6 (d,  $J_{\text{CF}} = 3.3$  Hz), 126.3, 125.54 (d,  $J_{\text{CF}} = 3.3$  Hz), 125.4 (d,  $J_{\text{CF}} = 8.0$  Hz), 122.7, 116.0 (d,  $J_{\text{CF}} = 22.0$  Hz), 115.6 (d,  $J_{\text{CF}} = 21.8$  Hz), 110.4, 107.1, 106.7; HRMS (ESI)  $m/z$  calcd for  $\text{C}_{27}\text{H}_{16}\text{F}_2\text{NaO}_3$   $[\text{M} + \text{Na}]^+$  449.0960, found 449.0962.

*(4-Methyl-2-(5-methylfuran-2-yl)phenyl)(5-methylfuran-2-yl)methanone (4i)*. Yellow oil (28 mg, 40%); IR (KBr): 2922, 2853, 1651, 1607, 1513, 1447, 1366, 1309, 1210, 1024, 817, 792, 768  $\text{cm}^{-1}$ ;  $^1\text{H}$  NMR (400 MHz,  $\text{CDCl}_3$ )  $\delta$  7.50 (s, 1H), 7.32 (d,  $J = 7.8$  Hz, 1H), 7.12 (d,  $J = 7.8$  Hz, 1H), 6.69 (d,  $J = 3.2$  Hz, 1H), 6.35 (d,  $J = 3.1$  Hz, 1H), 6.03 (d,  $J = 2.7$  Hz, 1H), 5.91 (d,  $J = 2.7$  Hz,

1H), 2.43 (s, 3H), 2.35 (s, 3H), 2.21 (s, 3H); <sup>13</sup>C NMR (100 MHz, CDCl<sub>3</sub>) δ 185.0, 158.5, 152.4, 151.7, 150.2, 140.3, 132.9, 129.3, 128.6, 127.4, 126.8, 122.2, 109.6, 108.9, 107.7, 21.4, 14.1, 13.5; HRMS (ESI) m/z calcd for C<sub>18</sub>H<sub>16</sub>NaO<sub>3</sub> [M + Na]<sup>+</sup> 303.0992, found 303.0996.

*(5-Benzylfuran-2-yl)(2-(5-benzylfuran-2-yl)-4-methylphenyl)methanone (4m)*. Yellow oil (59 mg, 55%); IR (KBr): 2923, 2855, 1652, 1605, 1541, 1509, 1453, 1425, 1383, 1307, 1205, 1023, 816, 792, 769, 708 cm<sup>-1</sup>; <sup>1</sup>H NMR (400 MHz, CDCl<sub>3</sub>) δ 7.47 (s, 1H), 7.35 – 7.27 (m, 4H), 7.24 – 7.18 (m, 5H), 7.13 (d, *J* = 6.7 Hz, 3H), 6.69 (d, *J* = 3.4 Hz, 1H), 6.38 (d, *J* = 3.3 Hz, 1H), 5.95 (d, *J* = 3.5 Hz, 1H), 5.90 (d, *J* = 3.3 Hz, 1H), 3.97 (s, 2H), 3.81 (s, 2H), 2.42 (s, 3H); <sup>13</sup>C NMR (100 MHz, CDCl<sub>3</sub>) δ 185.1, 160.8, 155.0, 151.9, 150.9, 140.3, 137.8, 136.5, 133.1, 129.3, 128.9, 128.7, 128.7, 128.6, 128.4, 127.7, 127.0, 126.9, 126.4, 121.8, 109.4, 109.2, 108.3, 34.8, 34.4, 21.4; HRMS (ESI) m/z calcd for C<sub>30</sub>H<sub>24</sub>NaO<sub>3</sub> [M + Na]<sup>+</sup> 455.1618, found 455.1622.

*(4-Methyl-2-(5-phenylfuran-2-yl)phenyl)(5-phenylfuran-2-yl)methanone (4n)*. Yellow oil (53 mg, 53%); IR (KBr): 2926, 2852, 1654, 1600, 1515, 1471, 1371, 1311, 1267, 1070, 815, 761, 690 cm<sup>-1</sup>; <sup>1</sup>H NMR (400 MHz, CDCl<sub>3</sub>) δ 7.72 (d, *J* = 1.5 Hz, 1H), 7.70 (s, 1H), 7.60 (s, 1H), 7.53 (t, *J* = 1.6 Hz, 1H), 7.50 (d, *J* = 2.9 Hz, 1H), 7.44 (d, *J* = 7.8 Hz, 1H), 7.41 – 7.27 (m, 4H), 7.26 – 7.12 (m, 3H), 6.95 (d, *J* = 3.6 Hz, 1H), 6.64 (t, *J* = 3.3 Hz, 2H), 6.57 (d, *J* = 3.5 Hz, 1H), 2.48 (s, 3H); <sup>13</sup>C NMR (100 MHz, CDCl<sub>3</sub>) δ 185.1, 158.4, 154.1, 151.9, 151.6, 140.5, 133.3, 130.3, 129.3, 129.2, 129.0, 128.8, 128.7, 128.6, 128.1, 127.4, 126.9, 125.1, 123.7, 122.4, 110.4, 107.4, 107.0, 21.5; HRMS (ESI) m/z calcd for C<sub>28</sub>H<sub>20</sub>NaO<sub>3</sub> [M + Na]<sup>+</sup> 427.1305, found 427.1310.

*(4-Methyl-2-(5-(o-tolyl)furan-2-yl)phenyl)(5-(o-tolyl)furan-2-yl)methanone (4o)*. Yellow oil (53 mg, 49%); IR (KBr): 2924, 2853, 1649, 1510, 1462, 1374, 1308, 1256, 1030, 815, 760 cm<sup>-1</sup>; <sup>1</sup>H NMR (400 MHz, CDCl<sub>3</sub>) δ 7.66 – 7.62 (m, 1H), 7.61 (s, 1H), 7.57 – 7.54 (m, 1H), 7.44 (d, *J* = 7.8 Hz, 1H), 7.24 – 7.18 (m, 4H), 7.17 – 7.11 (m, 3H), 7.02 (d, *J* = 3.6 Hz, 1H), 6.65 (d, *J* = 3.5 Hz, 1H), 6.55 (d, *J* = 3.7 Hz, 1H), 6.50 (d, *J* = 3.5 Hz, 1H), 2.48 (s, 3H), 2.41 (s, 3H), 2.40 (s, 3H); <sup>13</sup>C NMR (100 MHz, CDCl<sub>3</sub>) δ 185.1, 158.3, 153.7, 151.7, 151.2, 140.5, 135.8, 134.3, 133.4, 131.3, 131.0, 129.7, 129.0, 128.8, 128.7, 128.1, 128.1, 127.4, 127.2, 126.8, 126.1, 126.0, 121.8, 110.8, 110.7, 110.3, 22.0, 21.7, 21.5; HRMS (ESI) m/z calcd for C<sub>30</sub>H<sub>24</sub>NaO<sub>3</sub> [M + Na]<sup>+</sup> 455.1618, found 455.1621.

*(5-(4-Fluorophenyl)furan-2-yl)(2-(5-(4-fluorophenyl)furan-2-yl)-4-methylphenyl)methanone (4p)*. Yellow oil (62 mg, 57%); IR (KBr): 2923, 2852, 1649, 1604, 1529, 1477, 1232, 1026, 836, 810,

766  $\text{cm}^{-1}$ ;  $^1\text{H}$  NMR (400 MHz,  $\text{CDCl}_3$ )  $\delta$  7.71 – 7.63 (m, 2H), 7.57 (s, 1H), 7.49 – 7.41 (m, 3H), 7.22 (d,  $J = 7.8$  Hz, 1H), 7.07 (t,  $J = 8.6$  Hz, 2H), 6.98 – 6.90 (m, 3H), 6.62 (d,  $J = 3.5$  Hz, 1H), 6.56 (d,  $J = 3.7$  Hz, 1H), 6.50 (d,  $J = 3.5$  Hz, 1H), 2.48 (s, 3H);  $^{13}\text{C}$  NMR (100 MHz,  $\text{CDCl}_3$ )  $\delta$  185.0, 163.2 (d,  $J_{CF} = 248.7$  Hz), 162.1 (d,  $J_{CF} = 245.8$  Hz), 157.4, 153.3, 151.9, 151.6, 140.6, 133.2, 128.9, 128.8, 128.2, 127.0, 127.0 (d,  $J_{CF} = 8.3$  Hz), 126.7 (d,  $J_{CF} = 3.2$  Hz), 125.6 (d,  $J_{CF} = 3.3$  Hz), 125.4 (d,  $J_{CF} = 8.0$  Hz), 122.3, 116.0 (d,  $J_{CF} = 22.0$  Hz), 115.6 (d,  $J_{CF} = 21.8$  Hz), 110.3, 107.1, 106.6, 21.5; HRMS (ESI)  $m/z$  calcd for  $\text{C}_{28}\text{H}_{18}\text{F}_2\text{NaO}_3$   $[\text{M} + \text{Na}]^+$  463.1116, found 463.1117.

### Characterization of 3

*2-Methyl-8H-indeno[2,1-*b*]furan-8-one (3a)*. Yellow solid (83 mg, 90%); mp 65.8 – 66.1  $^\circ\text{C}$ ; IR (KBr): 2922, 2854, 1708, 1609, 1562, 1506, 1414, 1311, 1272, 1025, 759  $\text{cm}^{-1}$ ;  $^1\text{H}$  NMR (400 MHz,  $\text{CDCl}_3$ )  $\delta$  7.30 (d,  $J = 7.1$  Hz, 1H), 7.21 (t,  $J = 7.5$  Hz, 1H), 7.09 (t,  $J = 7.5$  Hz, 1H), 6.94 (d,  $J = 7.1$  Hz, 1H), 6.16 (s, 1H), 2.38 (s, 3H);  $^{13}\text{C}$  NMR (100 MHz,  $\text{CDCl}_3$ )  $\delta$  177.5, 164.5, 152.4, 148.9, 136.1, 135.5, 133.0, 128.5, 123.6, 119.8, 103.8, 14.6; HRMS (ESI)  $m/z$  calcd for  $\text{C}_{12}\text{H}_8\text{NaO}_2$   $[\text{M} + \text{Na}]^+$  207.0417, found 207.0418.

*8H-indeno[2,1-*b*]furan-8-one (3b)*. Yellow solid (73 mg, 86%); mp 86.3 – 86.7  $^\circ\text{C}$ ; IR (KBr): 2923, 2851, 1705, 1611, 1452, 1415, 1273, 1033, 750  $\text{cm}^{-1}$ ;  $^1\text{H}$  NMR (400 MHz,  $\text{CDCl}_3$ )  $\delta$  7.61 (br, 1H), 7.37 (d,  $J = 7.1$  Hz, 1H), 7.28 (t,  $J = 5.8$  Hz, 1H), 7.14 (t,  $J = 7.5$  Hz, 1H), 7.03 (d,  $J = 7.1$  Hz, 1H), 6.54 (br, 1H);  $^{13}\text{C}$  NMR (100 MHz,  $\text{CDCl}_3$ )  $\delta$  178.4, 154.2, 152.6, 147.0, 135.9, 135.3, 133.5, 128.6, 124.0, 120.1, 106.9; HRMS (ESI)  $m/z$  calcd for  $\text{C}_{11}\text{H}_6\text{NaO}_2$   $[\text{M} + \text{Na}]^+$  193.0260, found 193.0258.

*2-Ethyl-8H-indeno[2,1-*b*]furan-8-one (3c)*. Yellow solid (91 mg, 92%); mp 79.5 – 79.8  $^\circ\text{C}$ ; IR (KBr): 2975, 2915, 1695, 1608, 1503, 1453, 1423, 1378, 1328, 1145, 1106, 763  $\text{cm}^{-1}$ ;  $^1\text{H}$  NMR (400 MHz,  $\text{CDCl}_3$ )  $\delta$  7.31 (d,  $J = 7.1$  Hz, 1H), 7.21 (t,  $J = 7.5$  Hz, 1H), 7.09 (t,  $J = 7.5$  Hz, 1H), 6.94 (d,  $J = 7.1$  Hz, 1H), 6.18 (s, 1H), 2.72 (q,  $J = 7.6$  Hz, 2H), 1.29 (t,  $J = 7.6$  Hz, 3H);  $^{13}\text{C}$  NMR (100 MHz,  $\text{CDCl}_3$ )  $\delta$  177.7, 170.0, 152.3, 148.7, 136.1, 135.6, 133.0, 128.5, 123.6, 119.7, 102.3, 22.4, 11.7; HRMS (ESI)  $m/z$  calcd for  $\text{C}_{13}\text{H}_{11}\text{O}_2$   $[\text{M} + \text{H}]^+$  199.0754, found 199.0756.

*2-Benzyl-8H-indeno[2,1-b]furan-8-one (3d)*. Yellow solid (124 mg, 95%); mp 70.5 – 70.9 °C; IR (KBr): 3029, 2922, 1708, 1610, 1498, 1453, 1419, 1386, 1272, 1021, 762, 717 cm<sup>-1</sup>; <sup>1</sup>H NMR (400 MHz, CDCl<sub>3</sub>) δ 7.40 – 7.27 (m, 6H), 7.23 (t, *J* = 7.5 Hz, 1H), 7.11 (t, *J* = 7.5 Hz, 1H), 6.94 (d, *J* = 7.1 Hz, 1H), 6.17 (s, 1H), 4.03 (s, 2H); <sup>13</sup>C NMR (100 MHz, CDCl<sub>3</sub>) δ 177.8, 166.8, 152.8, 148.5, 136.0, 135.9, 135.4, 133.1, 128.8, 128.9, 128.6, 127.2, 123.7, 119.8, 104.1, 35.5; HRMS (ESI) *m/z* calcd for C<sub>18</sub>H<sub>12</sub>NaO<sub>2</sub> [M + Na]<sup>+</sup> 283.0730, found 283.0730.

*2-Phenyl-8H-indeno[2,1-b]furan-8-one (3e)*. Yellow solid (93 mg, 76%); mp 118.5 – 119.0 °C; IR (KBr): 3063, 2929, 2848, 1700, 1611, 1466, 1417, 1311, 1235, 1021, 757, 713 cm<sup>-1</sup>; <sup>1</sup>H NMR (400 MHz, CDCl<sub>3</sub>) δ 7.73 (d, *J* = 7.8 Hz, 2H), 7.46 – 7.32 (m, 4H), 7.26 (t, *J* = 7.5 Hz, 1H), 7.13 (t, *J* = 7.5 Hz, 1H), 7.03 (d, *J* = 7.1 Hz, 1H), 6.75 (s, 1H); <sup>13</sup>C NMR (100 MHz, CDCl<sub>3</sub>) δ 177.8, 164.3, 152.8, 148.8, 136.3, 135.1, 133.2, 129.7, 129.3, 129.0, 128.8, 125.0, 123.7, 120.1, 101.6; HRMS (ESI) *m/z* calcd for C<sub>17</sub>H<sub>10</sub>NaO<sub>2</sub> [M + Na]<sup>+</sup> 269.0573, found 269.0575.

*2-(p-Tolyl)-8H-indeno[2,1-b]furan-8-one (3f)*. Yellow solid (95 mg, 73%); mp 136.7 – 137.2 °C; IR (KBr): 2918, 2851, 1703, 1611, 1467, 1415, 1372, 1146, 1020, 809, 755 cm<sup>-1</sup>; <sup>1</sup>H NMR (400 MHz, CDCl<sub>3</sub>) δ 7.62 (d, *J* = 7.8 Hz, 2H), 7.34 (d, *J* = 7.1 Hz, 1H), 7.22 (t, *J* = 8.1 Hz, 3H), 7.12 (t, *J* = 7.5 Hz, 1H), 7.01 (d, *J* = 7.1 Hz, 1H), 6.69 (s, 1H), 2.36 (s, 3H); <sup>13</sup>C NMR (100 MHz, CDCl<sub>3</sub>) δ 177.6, 164.7, 152.5, 149.0, 140.1, 136.5, 135.1, 133.1, 129.7, 128.8, 126.6, 125.0, 123.6, 120.0, 101.0, 21.5; HRMS (ESI) *m/z* calcd for C<sub>18</sub>H<sub>12</sub>NaO<sub>2</sub> [M + Na]<sup>+</sup> 283.0730, found 283.0733.

*2-(o-Tolyl)-8H-indeno[2,1-b]furan-8-one (3g)*. Yellow solid (91 mg, 70%); mp 116.7 – 117.2 °C; IR (KBr): 3052, 1703, 1610, 1481, 1374, 1274, 1020, 750 cm<sup>-1</sup>; <sup>1</sup>H NMR (400 MHz, CDCl<sub>3</sub>) δ 7.74 (d, *J* = 7.4 Hz, 1H), 7.39 (d, *J* = 7.1 Hz, 1H), 7.34 – 7.25 (m, 4H), 7.16 (t, *J* = 7.5 Hz, 1H), 7.07 (d, *J* = 7.1 Hz, 1H), 6.68 (s, 1H), 2.57 (s, 3H); <sup>13</sup>C NMR (100 MHz, CDCl<sub>3</sub>) δ 177.9, 164.4, 152.6, 148.6, 136.3, 135.9, 135.3, 133.2, 131.6, 129.5, 128.8, 128.7, 128.0, 126.3, 123.8, 120.0, 105.1, 22.0; HRMS (ESI) *m/z* calcd for C<sub>18</sub>H<sub>12</sub>NaO<sub>2</sub> [M + Na]<sup>+</sup> 283.0730, found 283.0729.

*2-(4-Fluorophenyl)-8H-indeno[2,1-b]furan-8-one (3h)*. Yellow solid (106 mg, 80%); mp 159.2 – 159.8 °C; IR (KBr): 2922, 2853, 1714, 1605, 1516, 1469, 1422, 1225, 1022, 811, 753 cm<sup>-1</sup>; <sup>1</sup>H NMR (400 MHz, CDCl<sub>3</sub>) δ 7.72 – 7.63 (m, 2H), 7.31 (d, *J* = 7.1 Hz, 1H), 7.23 (t, *J* = 7.5 Hz, 1H), 7.09 (dd, *J* = 17.7, 8.4 Hz, 3H), 6.99 (d, *J* = 7.1 Hz, 1H), 6.65 (s, 1H); <sup>13</sup>C NMR (100 MHz, CDCl<sub>3</sub>) δ 177.7, 163.4 (d, *J*<sub>CF</sub> = 249.6 Hz), 163.2, 152.7, 148.8, 136.2, 134.9, 133.2, 128.8, 126.9

(d,  $J_{CF}$  = 8.4 Hz), 125.63 (d,  $J_{CF}$  = 3.3 Hz), 123.7, 120.1, 116.2 (d,  $J_{CF}$  = 22.1 Hz), 101.3; HRMS (ESI) m/z calcd for  $C_{17}H_9FNaO_2$  [M + Na]<sup>+</sup> 287.0479, found 287.0474.

*Methyl 8-oxo-8H-indeno[2,1-b]furan-2-carboxylate (3i)*. Yellow solid (82 mg, 72%); mp 172.8 – 172.9 °C; IR (KBr): 3009, 1711, 1613, 1451, 1387, 1256, 1119, 752  $cm^{-1}$ ; <sup>1</sup>H NMR (400 MHz, CDCl<sub>3</sub>) δ 7.43 (d,  $J$  = 7.2 Hz, 1H), 7.35 (t,  $J$  = 7.5 Hz, 1H), 7.25 – 7.16 (m, 2H), 7.11 (d,  $J$  = 7.2 Hz, 1H), 3.95 (s, 3H); <sup>13</sup>C NMR (100 MHz, CDCl<sub>3</sub>) δ 178.8, 158.6, 156.0, 152.2, 145.6, 135.1, 134.7, 134.3, 129.2, 124.5, 120.7, 112.4, 52.6; HRMS (ESI) m/z calcd for  $C_{13}H_9O_4$  [M + H]<sup>+</sup> 229.0495, found 229.0493.

*2-Methyl-3-(methylthio)-8H-indeno[2,1-b]furan-8-one (3j)*. Yellow solid (101 mg, 88%); mp 117.3 – 117.8 °C; IR (KBr): 2923, 2854, 1706, 1610, 1505, 1474, 1417, 1141, 1022, 762  $cm^{-1}$ ; <sup>1</sup>H NMR (400 MHz, CDCl<sub>3</sub>) δ 7.22 (d,  $J$  = 7.1 Hz, 1H), 7.19 – 7.13 (m, 1H), 7.10 (d,  $J$  = 6.9 Hz, 1H), 7.06 – 6.99 (m, 1H), 2.35 (s, 3H), 2.25 (s, 3H); <sup>13</sup>C NMR (100 MHz, CDCl<sub>3</sub>) δ 177.2, 166.5, 151.5, 149.8, 135.6, 135.0, 133.2, 128.7, 123.8, 120.0, 112.4, 19.4, 12.9; HRMS (ESI) m/z calcd for  $C_{13}H_{10}NaO_2S$  [M + Na]<sup>+</sup> 253.0294, found 253.0296.

*6H-indeno[2,1-b]benzofuran-6-one (3k)*. Yellow solid (99 mg, 90%); mp 107.8 – 108.2 °C; IR (KBr): 2923, 2852, 1715, 1610, 1547, 1493, 1450, 1400, 1260, 1020, 745  $cm^{-1}$ ; <sup>1</sup>H NMR (400 MHz, CDCl<sub>3</sub>) δ 7.73 (d,  $J$  = 7.8 Hz, 1H), 7.54 (d,  $J$  = 8.4 Hz, 1H), 7.45 (t,  $J$  = 7.8 Hz, 1H), 7.42 – 7.28 (m, 3H), 7.19 (d,  $J$  = 7.1 Hz, 1H), 7.15 (t,  $J$  = 7.5 Hz, 1H); <sup>13</sup>C NMR (100 MHz, CDCl<sub>3</sub>) δ 180.6, 161.6, 154.7, 141.3, 136.0, 134.9, 133.8, 128.7, 128.6, 124.8, 124.1, 122.0, 122.0, 120.2, 113.8; HRMS (ESI) m/z calcd for  $C_{15}H_8NaO_2$  [M + Na]<sup>+</sup> 243.0417, found 243.0415.

*2,5-Dimethyl-8H-indeno[2,1-b]furan-8-one (3l)*. Yellow solid (92 mg, 93%); mp 100.5 – 100.9 °C; IR (KBr): 2953, 2921, 1716, 1697, 1613, 1561, 1507, 1477, 1401, 1271, 1021, 832, 798, 766  $cm^{-1}$ ; <sup>1</sup>H NMR (400 MHz, CDCl<sub>3</sub>) δ 7.19 (d,  $J$  = 7.3 Hz, 1H), 6.86 (d,  $J$  = 7.3 Hz, 1H), 6.77 (s, 1H), 6.13 (s, 1H), 2.37 (s, 3H), 2.28 (s, 3H); <sup>13</sup>C NMR (100 MHz, CDCl<sub>3</sub>) δ 177.7, 164.1, 152.7, 148.3, 143.8, 135.8, 133.5, 128.1, 123.7, 121.3, 103.6, 21.9, 14.6; HRMS (ESI) m/z calcd for  $C_{13}H_{10}NaO_2$  [M + Na]<sup>+</sup> 221.0573, found 221.0574.

*2-Benzyl-5-methyl-8H-indeno[2,1-b]furan-8-one (3m)*. Yellow solid (126 mg, 92%); mp 107.9 – 108.3 °C; IR (KBr): 2923, 2856, 1699, 1617, 1563, 1498, 1446, 1409, 1367, 1244, 1017, 770, 730, 701  $cm^{-1}$ ; <sup>1</sup>H NMR (400 MHz, CDCl<sub>3</sub>) δ 7.36 – 7.30 (m, 2H), 7.28 – 7.24 (m, 3H), 7.19 (d,  $J$  = 7.3 Hz, 1H), 6.85 (d,  $J$  = 7.3 Hz, 1H), 6.73 (s, 1H), 6.10 (s, 1H), 3.99 (s, 2H), 2.26 (s, 3H); <sup>13</sup>C NMR

(100 MHz, CDCl<sub>3</sub>)  $\delta$  178.0, 166.4, 153.2, 147.9, 144.0, 136.1, 135.7, 133.3, 128.9, 128.8, 128.2, 127.1, 123.8, 121.4, 104.0, 35.5, 22.0; HRMS (ESI)  $m/z$  calcd for C<sub>19</sub>H<sub>14</sub>NaO<sub>2</sub> [M + Na]<sup>+</sup> 297.0886, found 297.0892.

*5-Methyl-2-phenyl-8H-indeno[2,1-b]furan-8-one (3n)*. Yellow solid (117 mg, 90%); mp 122.9 – 123.2 °C; IR (KBr): 2920, 2856, 1698, 1614, 1443, 1407, 1368, 1213, 1119, 752, 712 cm<sup>-1</sup>; <sup>1</sup>H NMR (400 MHz, CDCl<sub>3</sub>)  $\delta$  7.74 – 7.68 (m, 2H), 7.46 – 7.34 (m, 3H), 7.23 (d,  $J$  = 7.3 Hz, 1H), 6.90 (d,  $J$  = 7.4 Hz, 1H), 6.85 (s, 1H), 6.71 (s, 1H); <sup>13</sup>C NMR (100 MHz, CDCl<sub>3</sub>)  $\delta$  178.0, 163.9, 153.2, 148.3, 144.1, 135.3, 133.7, 129.5, 129.4, 129.0, 128.5, 124.9, 123.8, 121.6, 101.5, 22.0; HRMS (ESI)  $m/z$  calcd for C<sub>18</sub>H<sub>13</sub>O<sub>2</sub> [M + H]<sup>+</sup> 261.0910, found 261.0908.

*5-Methyl-2-(o-tolyl)-8H-indeno[2,1-b]furan-8-one (3o)*. Yellow solid (111 mg, 81%); mp 140.4 – 140.5 °C; IR (KBr): 2921, 2851, 1691, 1618, 1461, 1270, 1019, 848, 816, 755, 714 cm<sup>-1</sup>; <sup>1</sup>H NMR (400 MHz, CDCl<sub>3</sub>)  $\delta$  7.77 – 7.69 (m, 1H), 7.31 – 7.25 (m, 4H), 6.96 – 6.88 (m, 2H), 6.65 (s, 1H), 2.56 (s, 3H), 2.34 (s, 3H); <sup>13</sup>C NMR (100 MHz, CDCl<sub>3</sub>)  $\delta$  178.2, 164.1, 153.1, 148.0, 144.1, 135.8, 135.6, 133.8, 131.6, 129.4, 128.9, 128.4, 128.0, 126.3, 123.9, 121.6, 105.0, 22.0; HRMS (ESI)  $m/z$  calcd for C<sub>19</sub>H<sub>14</sub>NaO<sub>2</sub> [M + Na]<sup>+</sup> 297.0886, found 297.0878.

*2-(4-Fluorophenyl)-5-methyl-8H-indeno[2,1-b]furan-8-one (3p)*. Yellow solid (124 mg, 89%); mp 155.6 – 155.9 °C; IR (KBr): 2922, 2850, 1693, 1615, 1469, 1421, 1231, 1013, 828, 761 cm<sup>-1</sup>; <sup>1</sup>H NMR (400 MHz, CDCl<sub>3</sub>)  $\delta$  7.74 – 7.69 (m, 2H), 7.25 (d,  $J$  = 7.4 Hz, 1H), 7.16 – 7.07 (m, 2H), 6.92 (d,  $J$  = 7.4 Hz, 1H), 6.87 (s, 1H), 6.68 (s, 1H), 2.32 (s, 3H); <sup>13</sup>C NMR (100 MHz, CDCl<sub>3</sub>)  $\delta$  177.9, 163.4 (d,  $J_{CF}$  = 249.4 Hz), 163.0, 153.2, 148.3, 144.2, 135.2, 133.7, 128.6, 126.9 (d,  $J_{CF}$  = 8.4 Hz), 125.8 (d,  $J_{CF}$  = 3.3 Hz), 123.9, 121.6, 116.2 (d,  $J_{CF}$  = 22.1 Hz), 101.2, 22.0; HRMS (ESI)  $m/z$  calcd for C<sub>18</sub>H<sub>12</sub>FO<sub>2</sub> [M + H]<sup>+</sup> 279.0816, found 279.0824.

*2-Ethyl-5-fluoro-8H-indeno[2,1-b]furan-8-one (3r)*. Yellow solid (91 mg, 84%); mp 59.3 – 59.5 °C; IR (KBr): 2921, 2851, 1708, 1659, 1633, 1451, 1415, 1380, 1198, 1111, 769 cm<sup>-1</sup>; <sup>1</sup>H NMR (400 MHz, CDCl<sub>3</sub>)  $\delta$  7.08 – 7.01 (m, 1H), 6.93 – 6.81 (m, 2H), 6.17 (s, 1H), 2.72 (q,  $J$  = 7.5 Hz, 2H), 1.30 (t,  $J$  = 7.6 Hz, 3H); <sup>13</sup>C NMR (100 MHz, CDCl<sub>3</sub>)  $\delta$  175.6, 170.7, 163.2 (d,  $J_{CF}$  = 247.8 Hz), 152.0, 148.8, 138.7 (d,  $J_{CF}$  = 6.7 Hz), 131.1 (d,  $J_{CF}$  = 3.9 Hz), 120.7 (d,  $J_{CF}$  = 7.5 Hz), 117.6 (d,  $J_{CF}$  = 22.5 Hz), 112.9 (d,  $J_{CF}$  = 25.2 Hz), 102.4, 22.4, 11.6; HRMS (ESI)  $m/z$  calcd for C<sub>13</sub>H<sub>9</sub>FNaO<sub>2</sub> [M + Na]<sup>+</sup> 239.0479, found 239.0482.

*2-(4-methoxyphenyl)-8H-indeno[2,1-b]furan-8-one(3s)*. Yellow solid (76 mg, 72%); mp 144.4 – 144.5 °C; IR (KBr): 3110, 2923, 2854, 1691, 1603, 1515, 1461, 1423, 1250, 816, 746; <sup>1</sup>H NMR (400 MHz, CDCl<sub>3</sub>) δ 7.69 (d, *J* = 8.1 Hz, 2H), 7.35 (d, *J* = 7.1 Hz, 1H), 7.26 (t, *J* = 7.4 Hz, 1H), 7.14 (t, *J* = 7.5 Hz, 1H), 7.03 (d, *J* = 7.1 Hz, 1H), 6.95 (d, *J* = 8.1 Hz, 2H), 6.65 (s, 1H), 3.85 (s, 3H). <sup>13</sup>C NMR (100 MHz, CDCl<sub>3</sub>) δ 177.44, 164.70, 160.91, 152.15, 149.35, 136.62, 135.09, 133.01, 128.79, 126.71, 123.58, 122.13, 119.97, 114.51, 100.25, 55.43; HRMS (ESI) *m/z* calcd for C<sub>18</sub>H<sub>13</sub>O<sub>3</sub>[M-H]<sup>-</sup> 277.0853, found 277.0859.

# NMR Spectra for All Compounds

## $^1\text{H}$ NMR and $^{13}\text{C}$ NMR of 1a

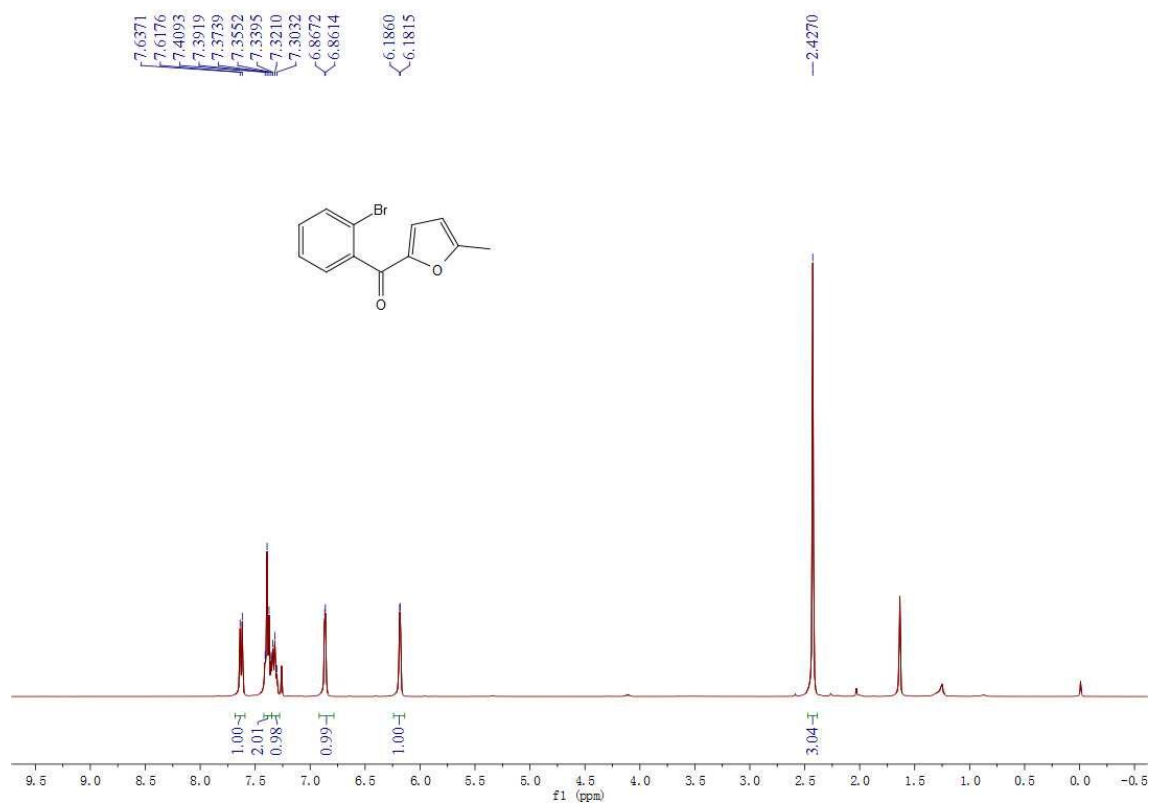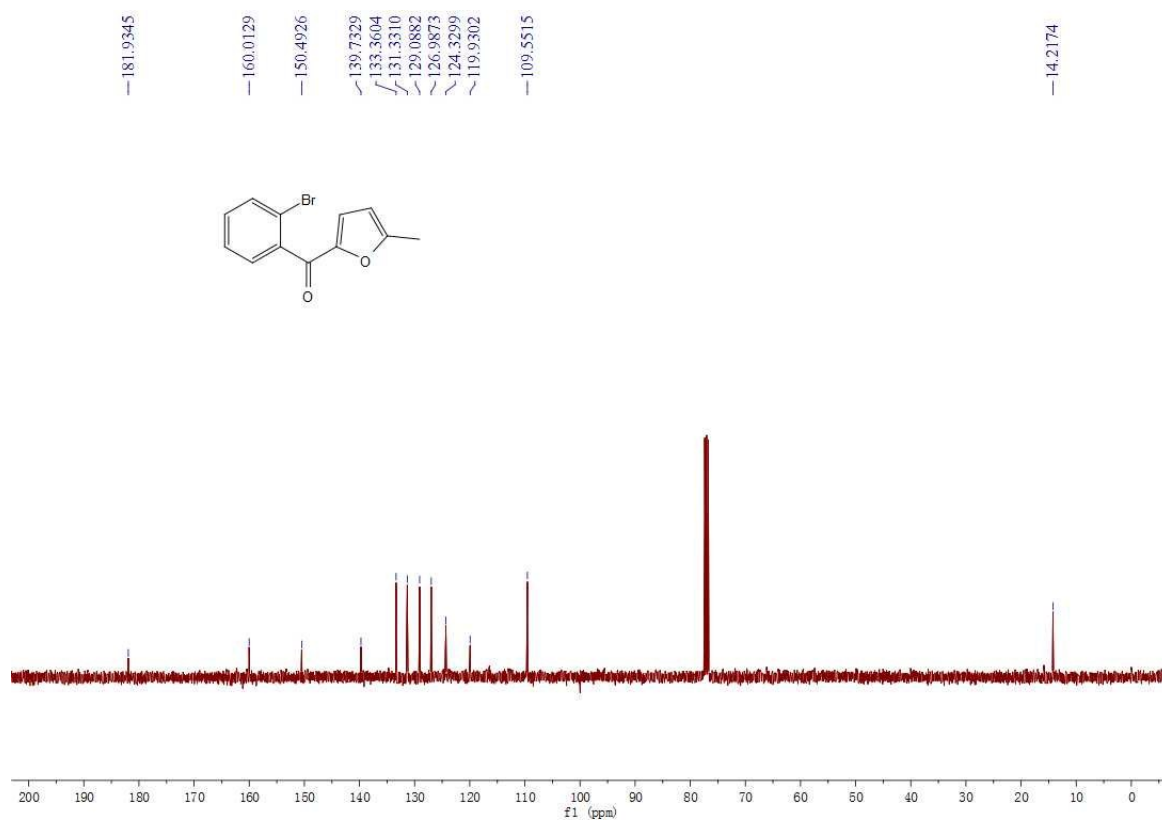



# <sup>1</sup>H NMR and <sup>13</sup>C NMR of 1b

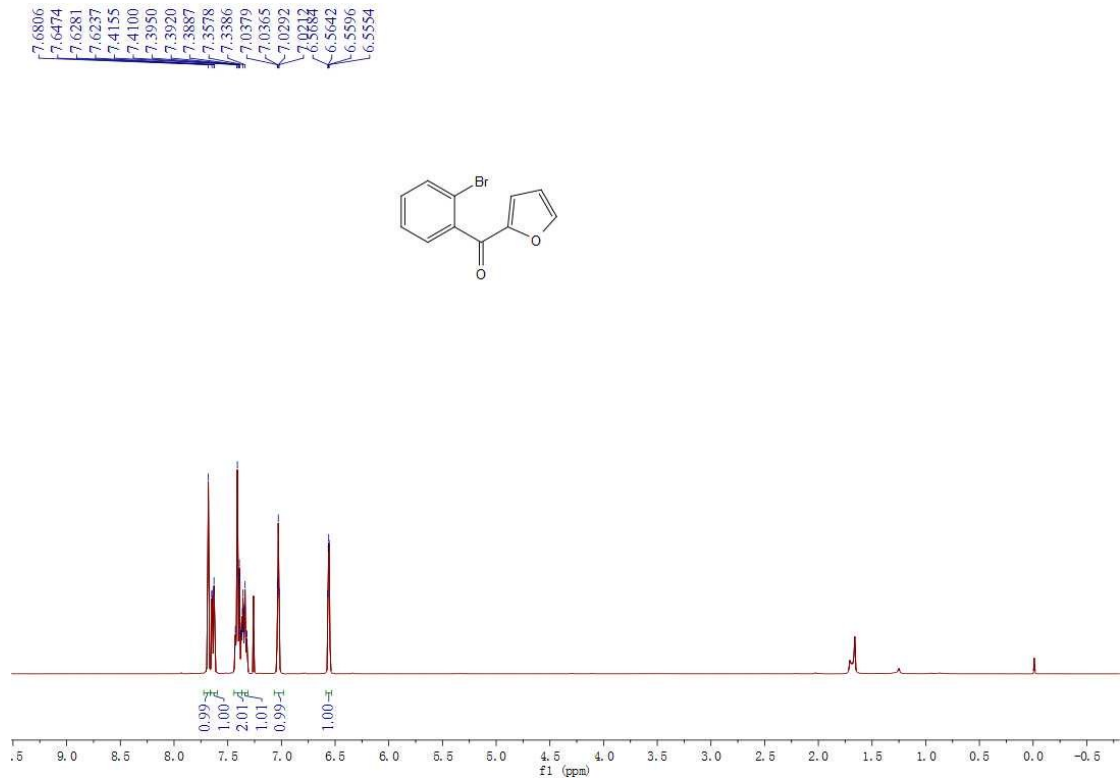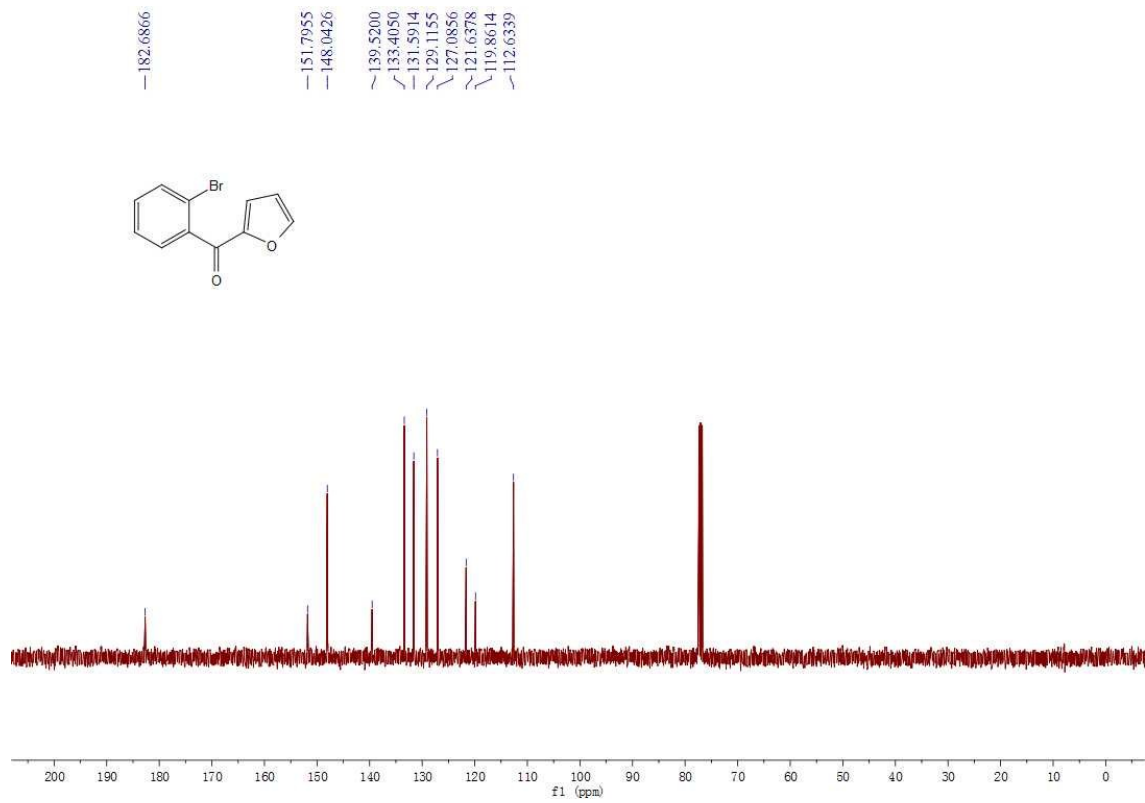

# <sup>1</sup>H NMR and <sup>13</sup>C NMR of 1c

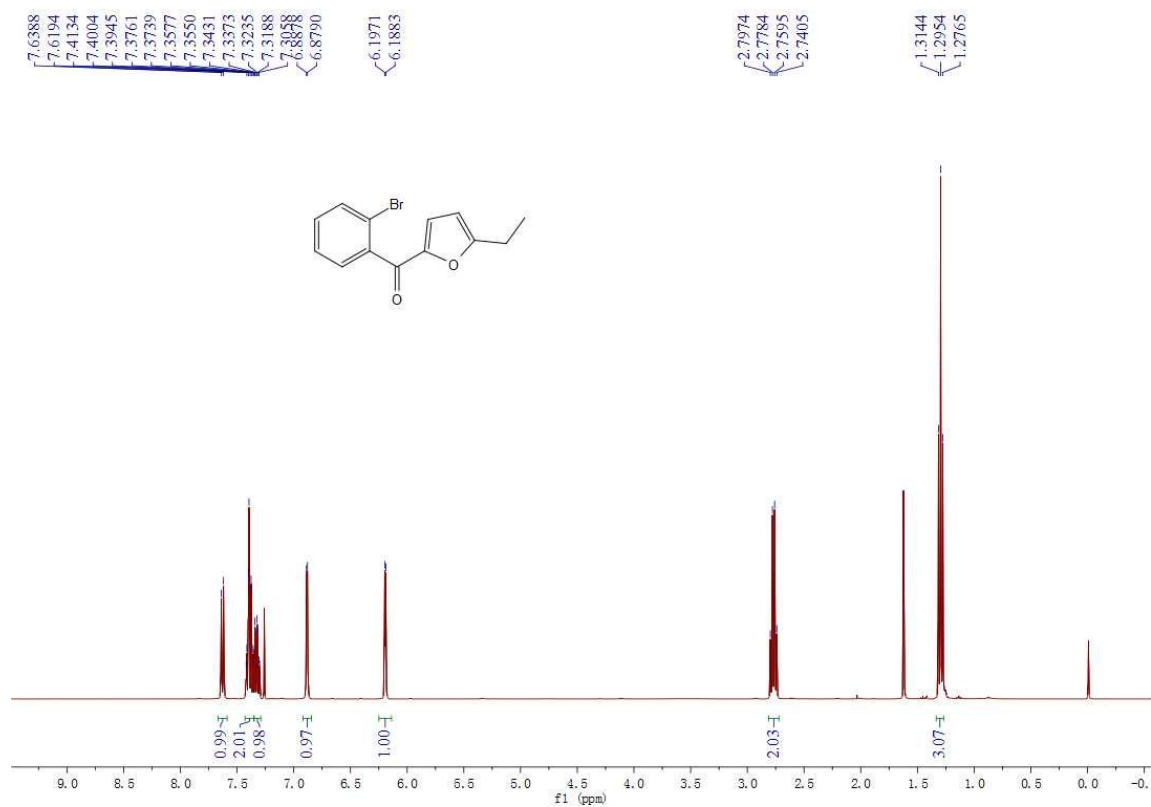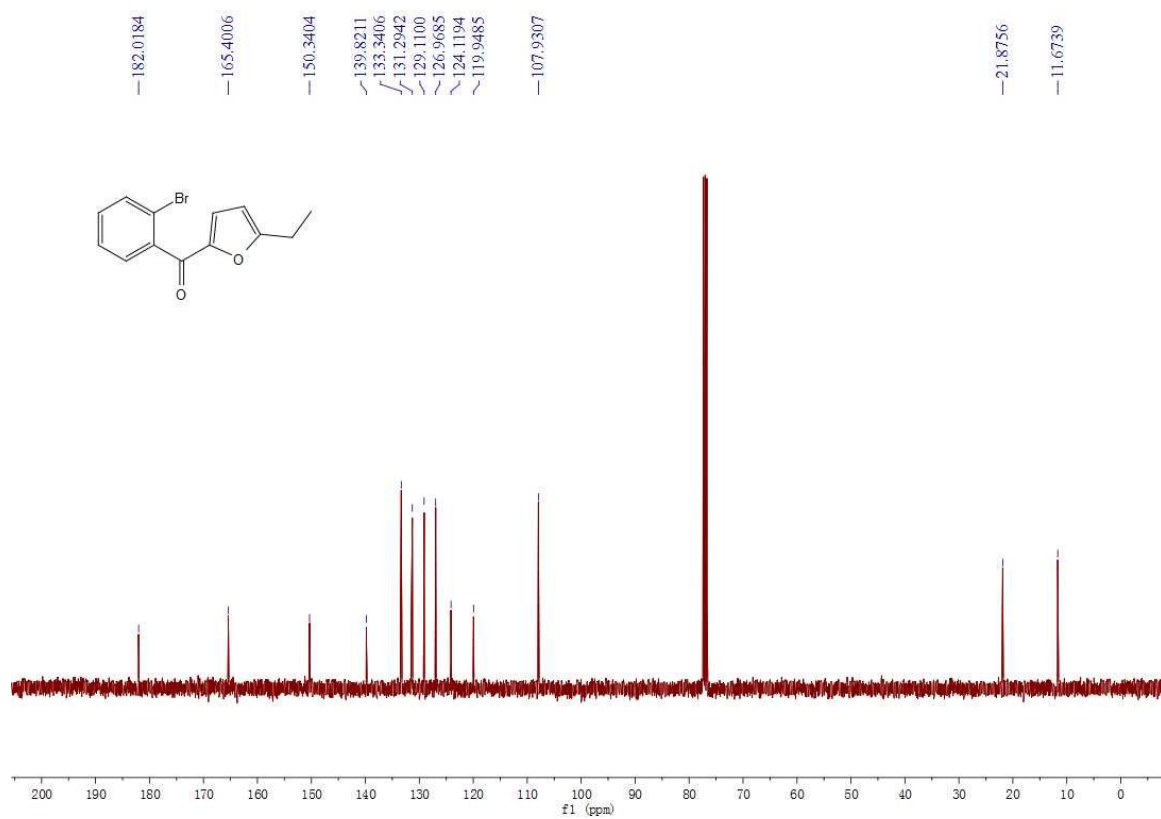

# <sup>1</sup>H NMR and <sup>13</sup>C NMR of 1d

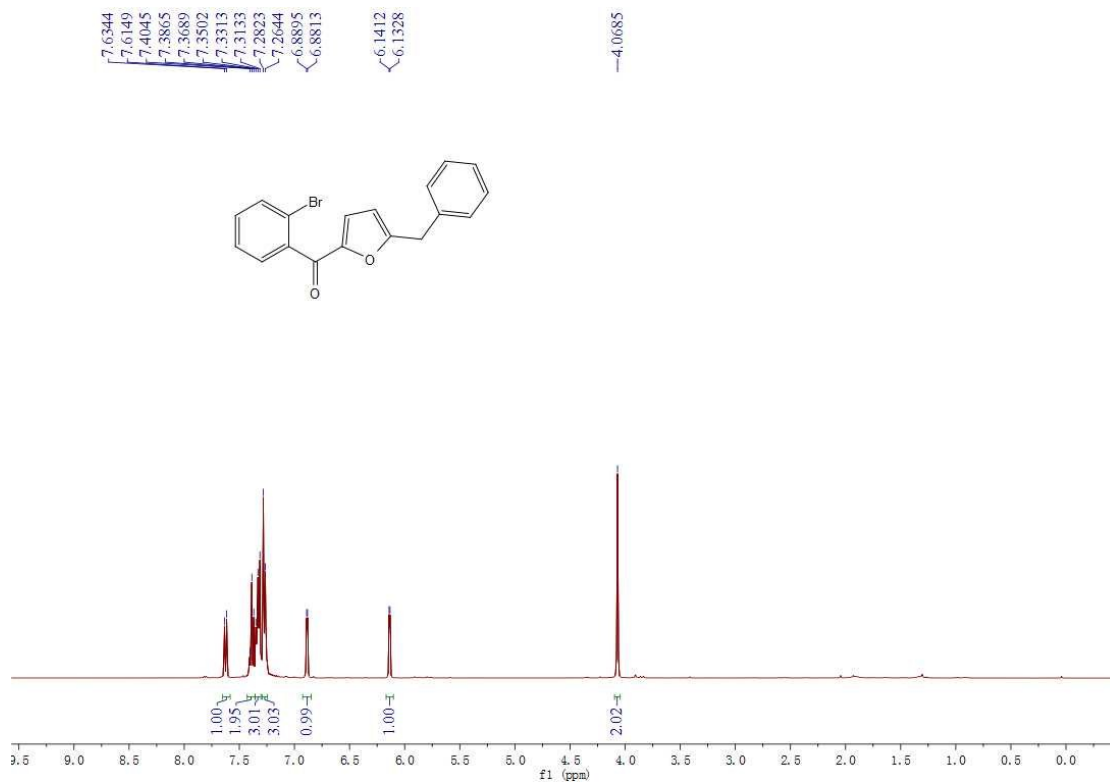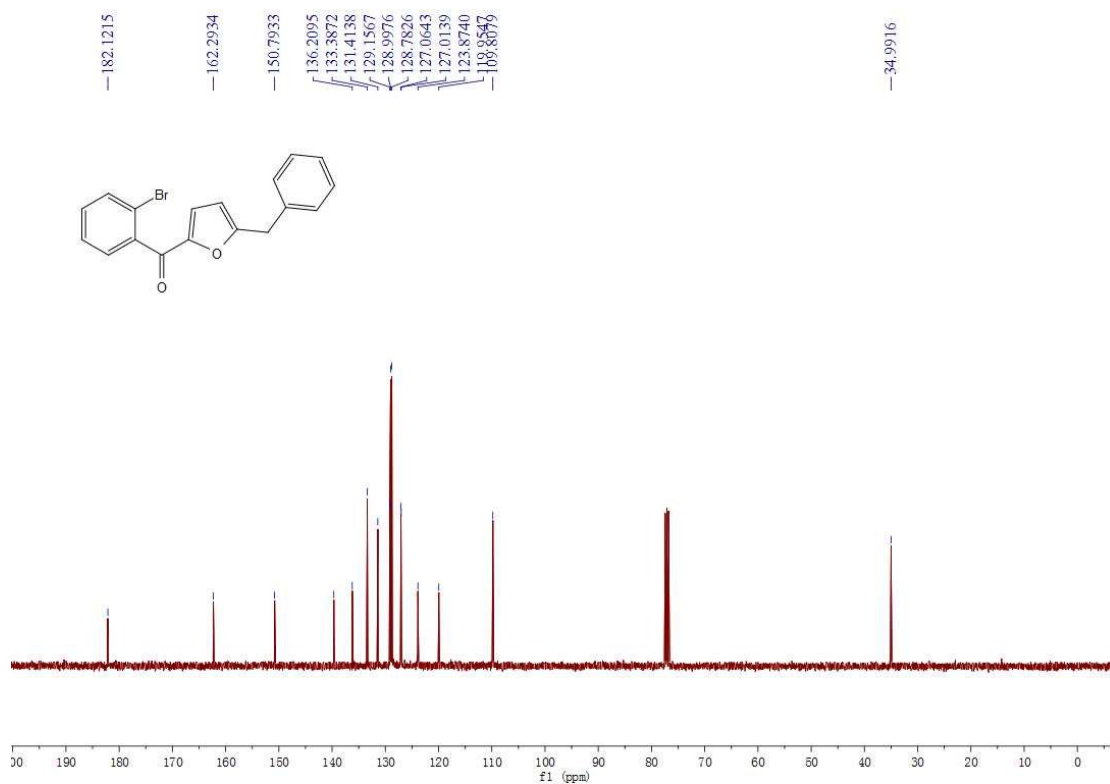

### $^1\text{H}$ NMR and $^{13}\text{C}$ NMR of 1e

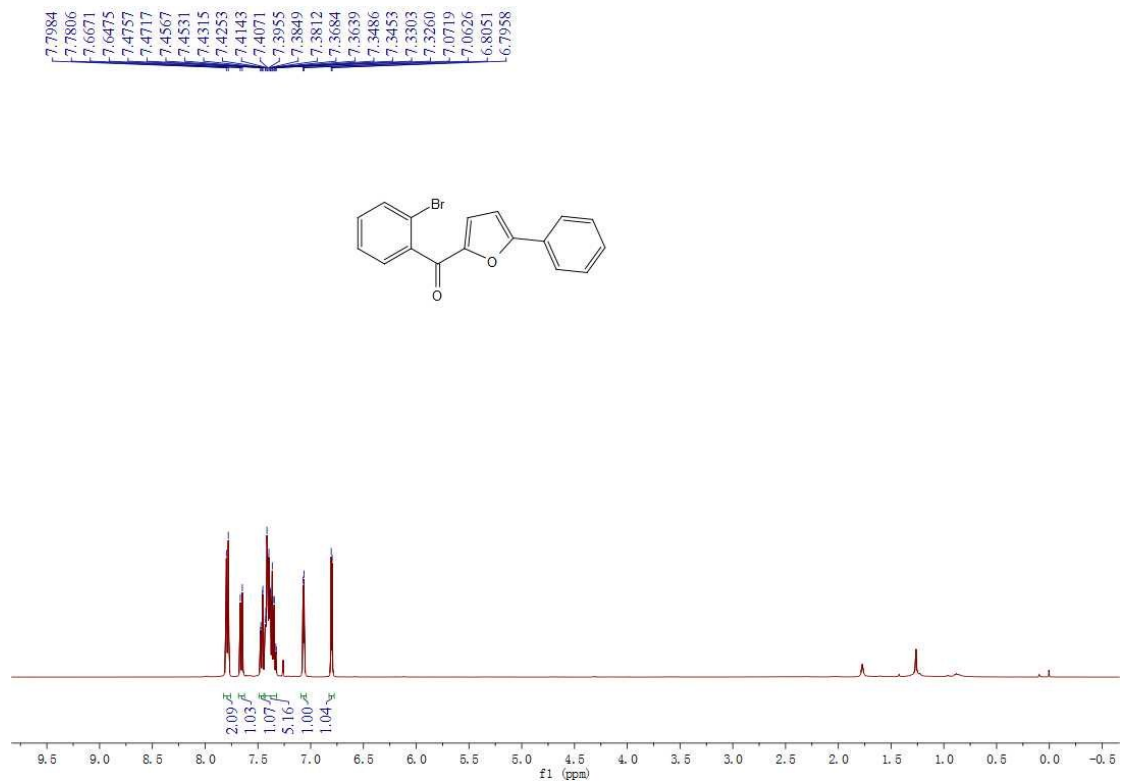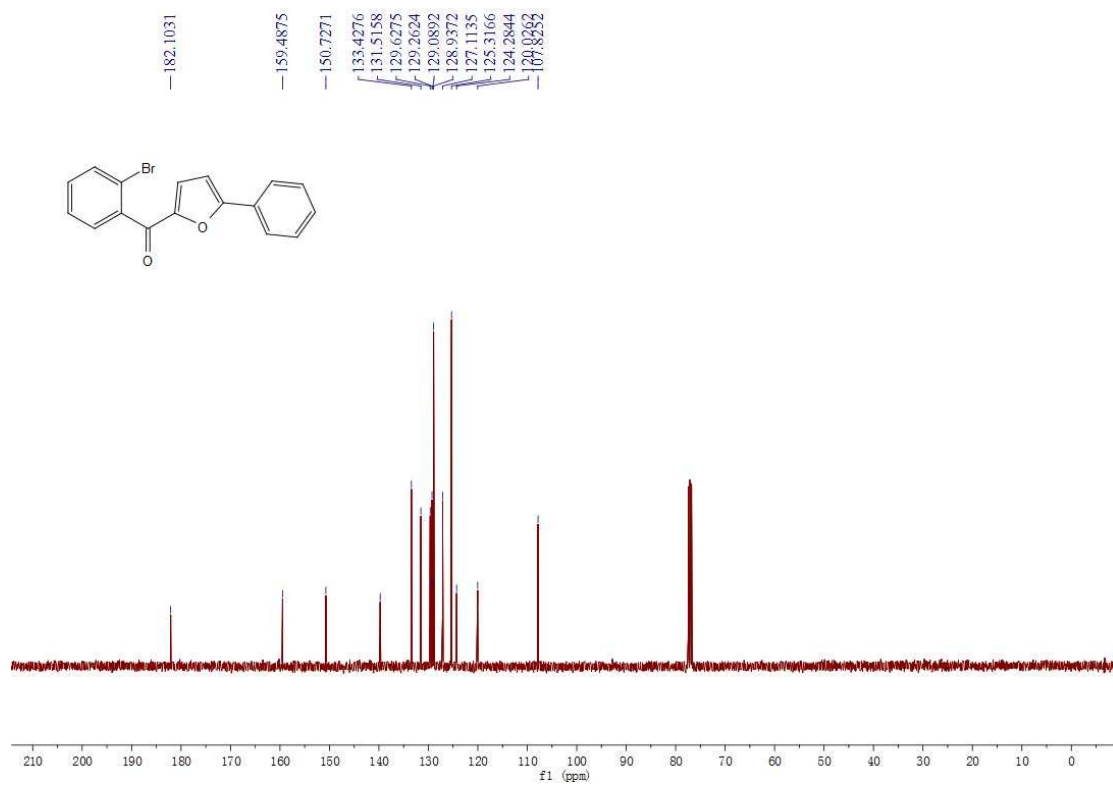

### $^1\text{H}$ NMR and $^{13}\text{C}$ NMR of 1f

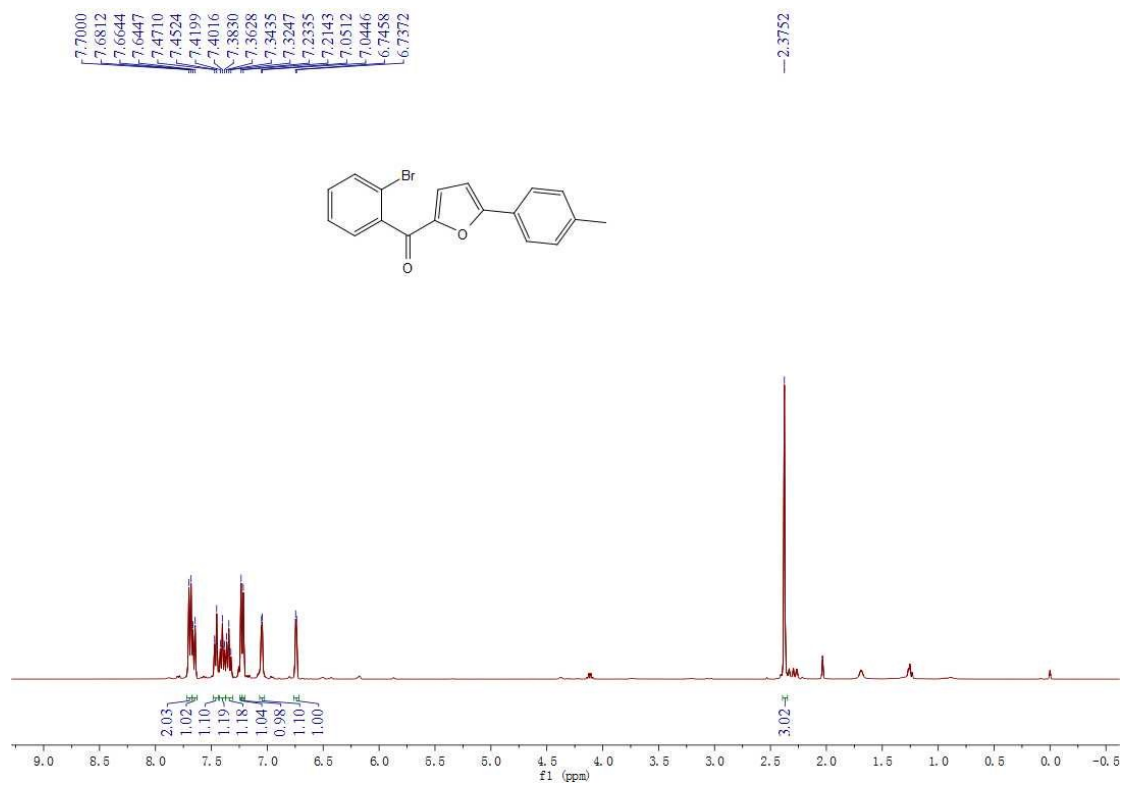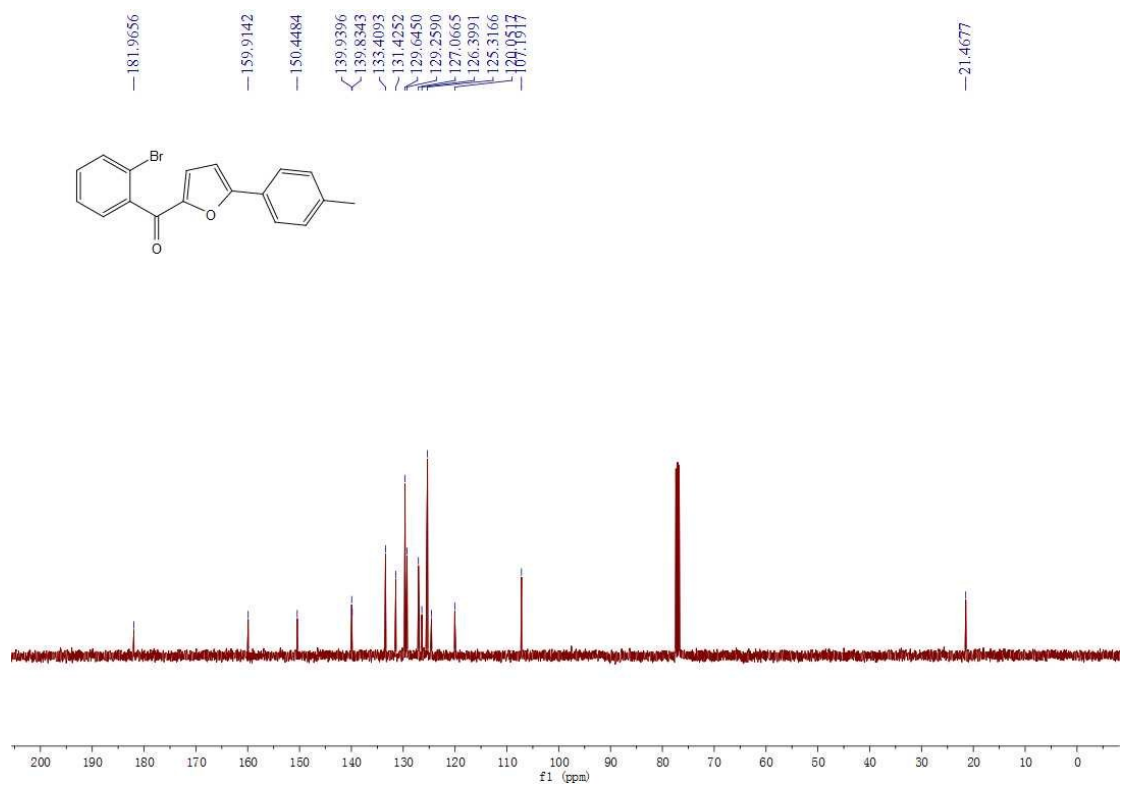

$^1\text{H}$  NMR and  $^{13}\text{C}$  NMR of 1g

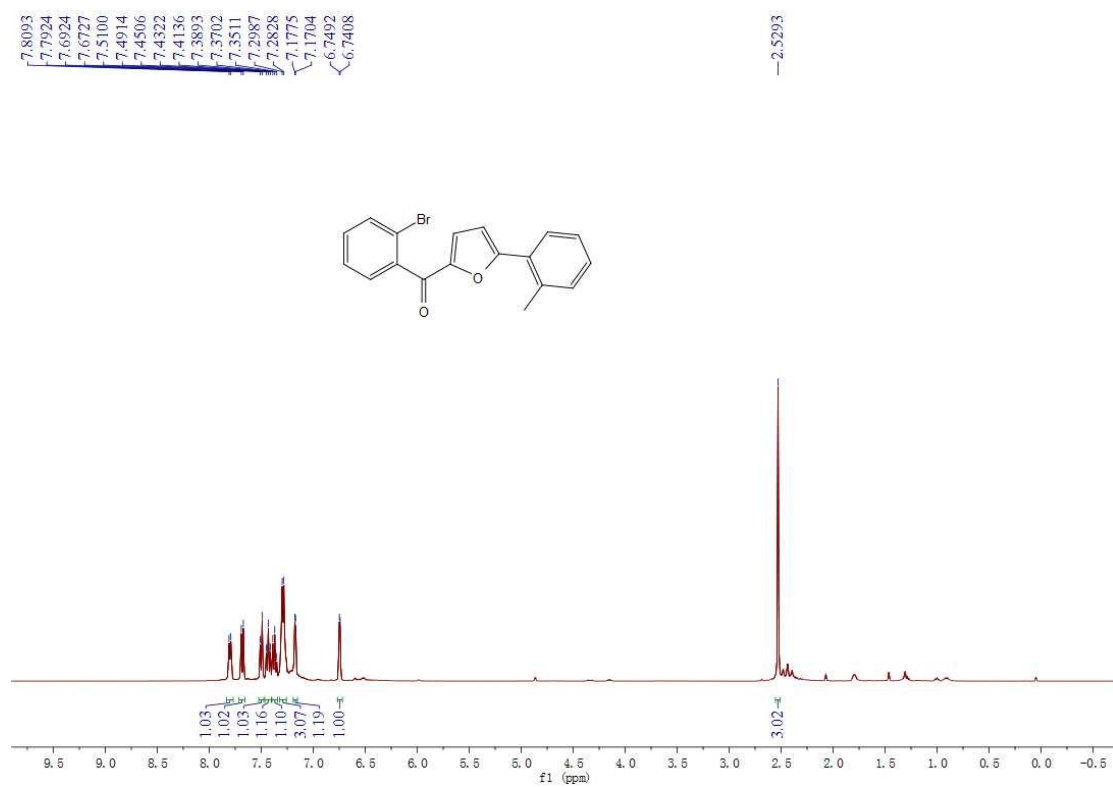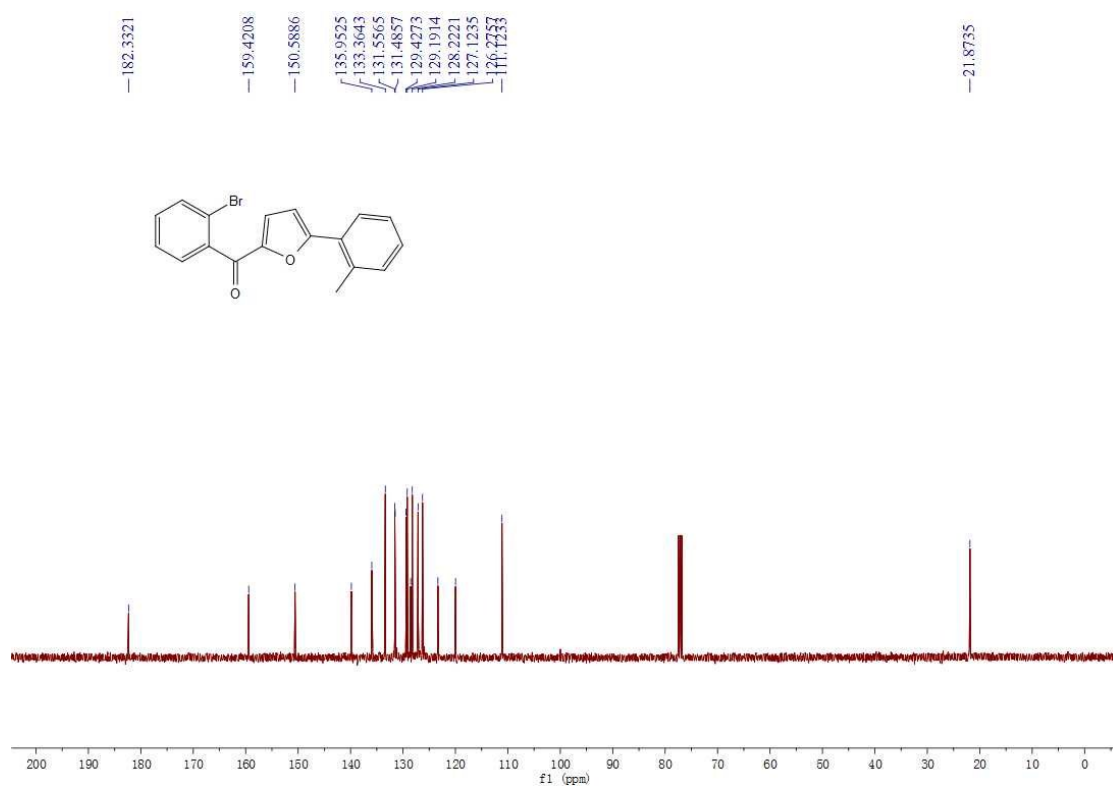

<sup>1</sup>H NMR and <sup>13</sup>C NMR of 1h

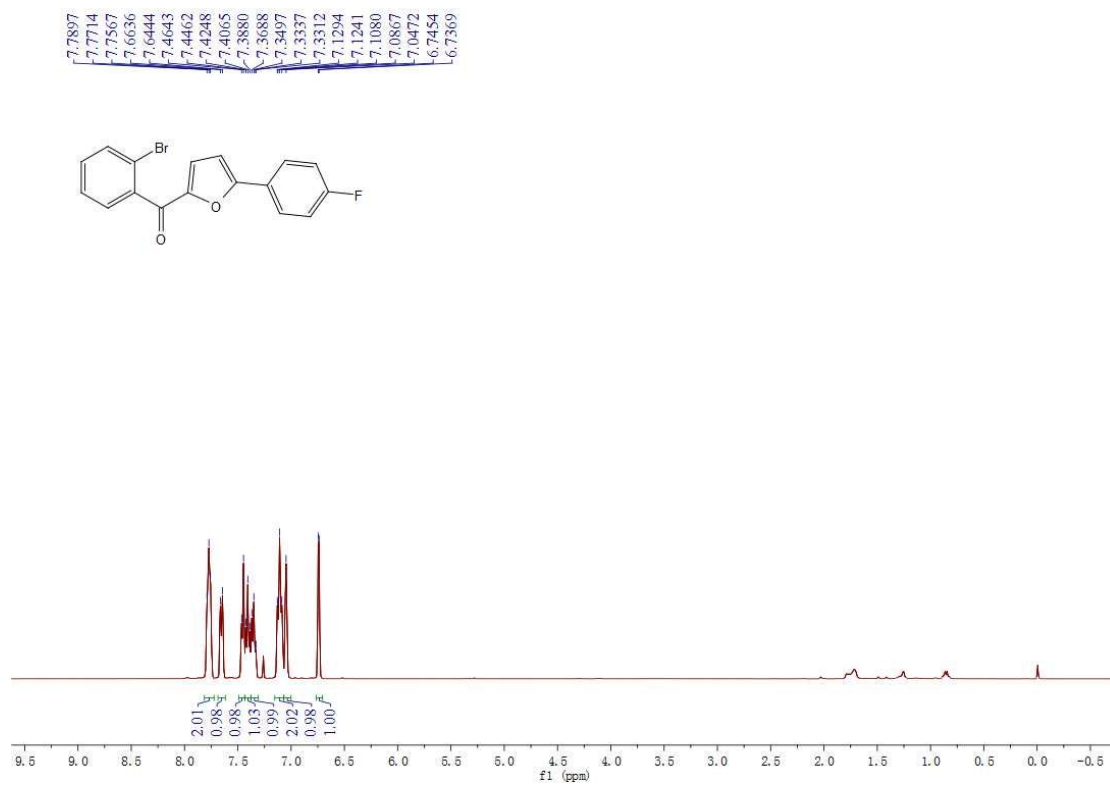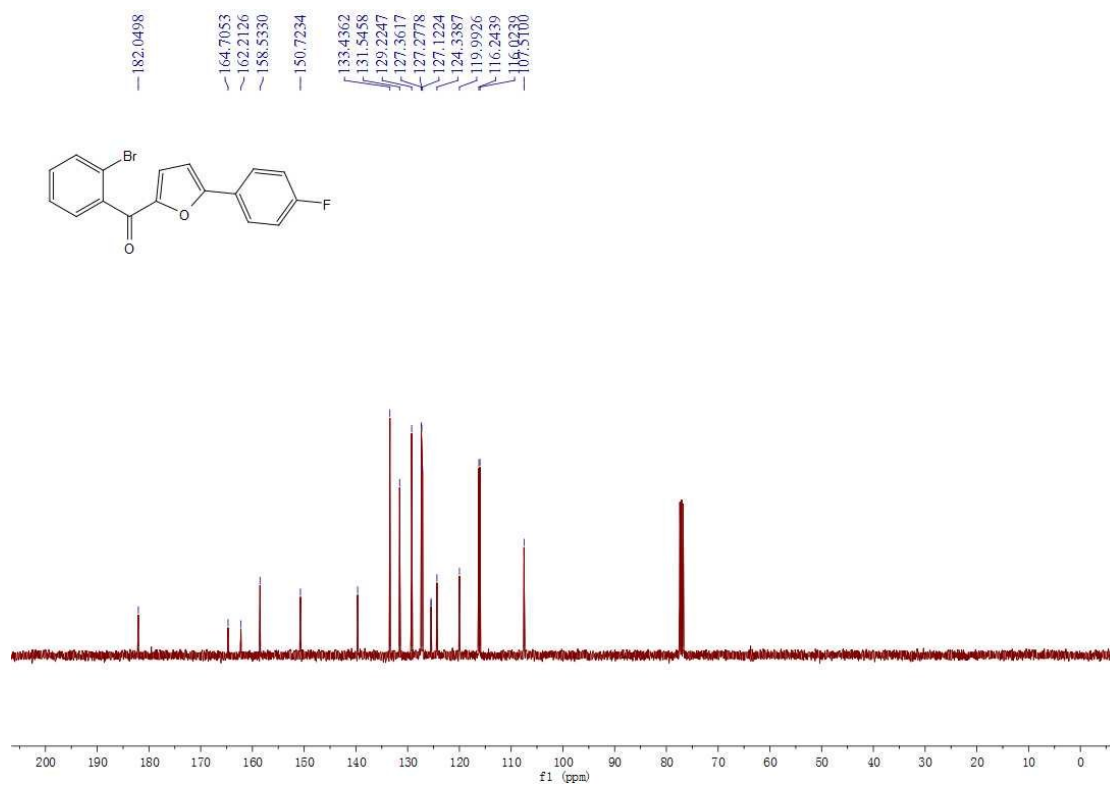

**$^1\text{H}$  NMR and  $^{13}\text{C}$  NMR of 1i**

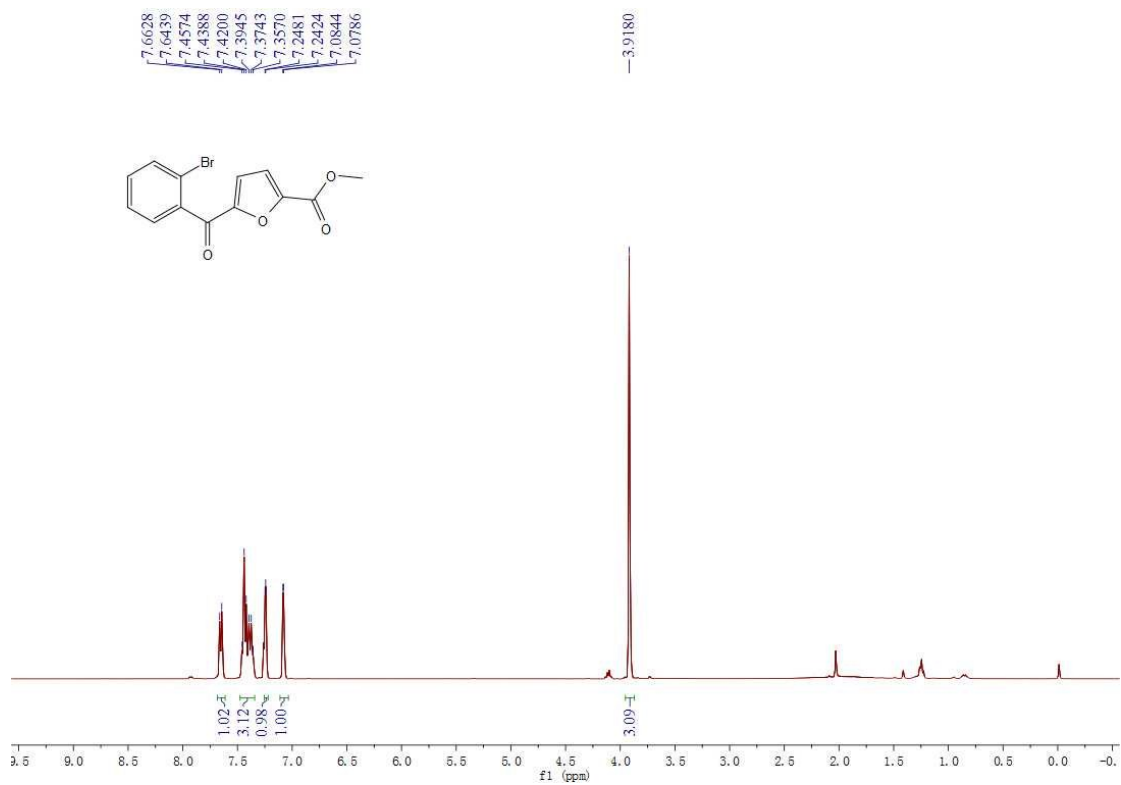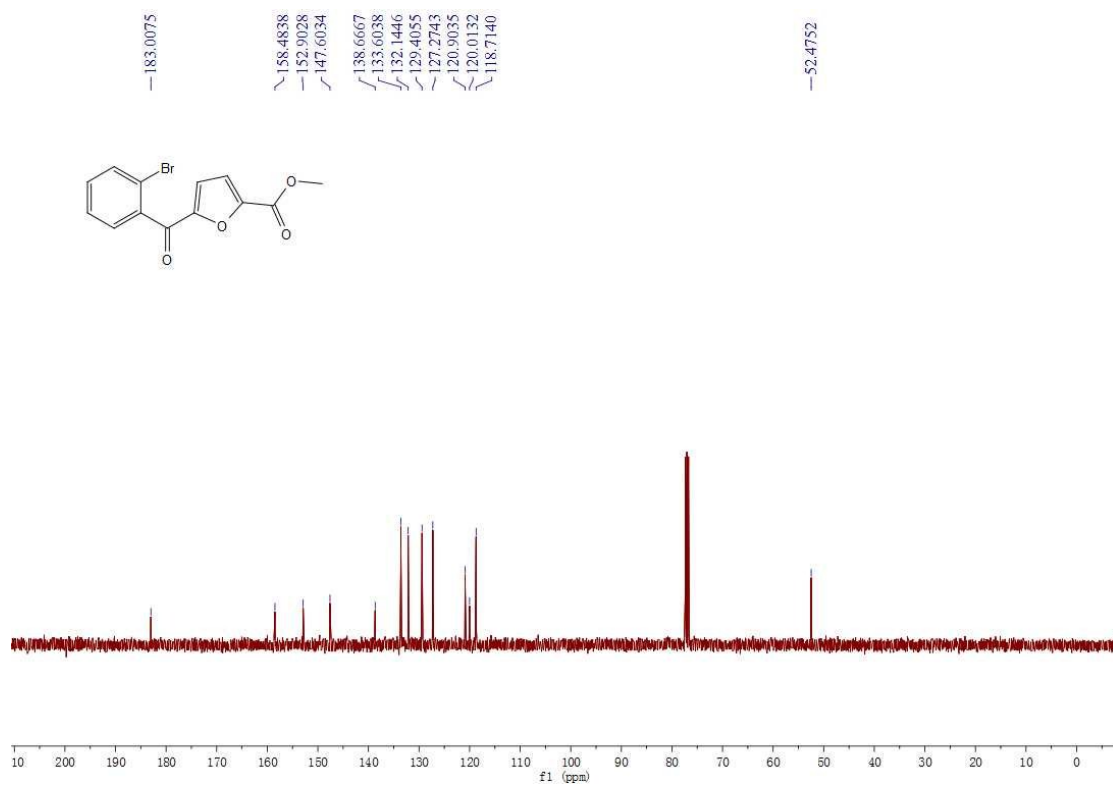

$^1\text{H}$  NMR and  $^{13}\text{C}$  NMR of 1j



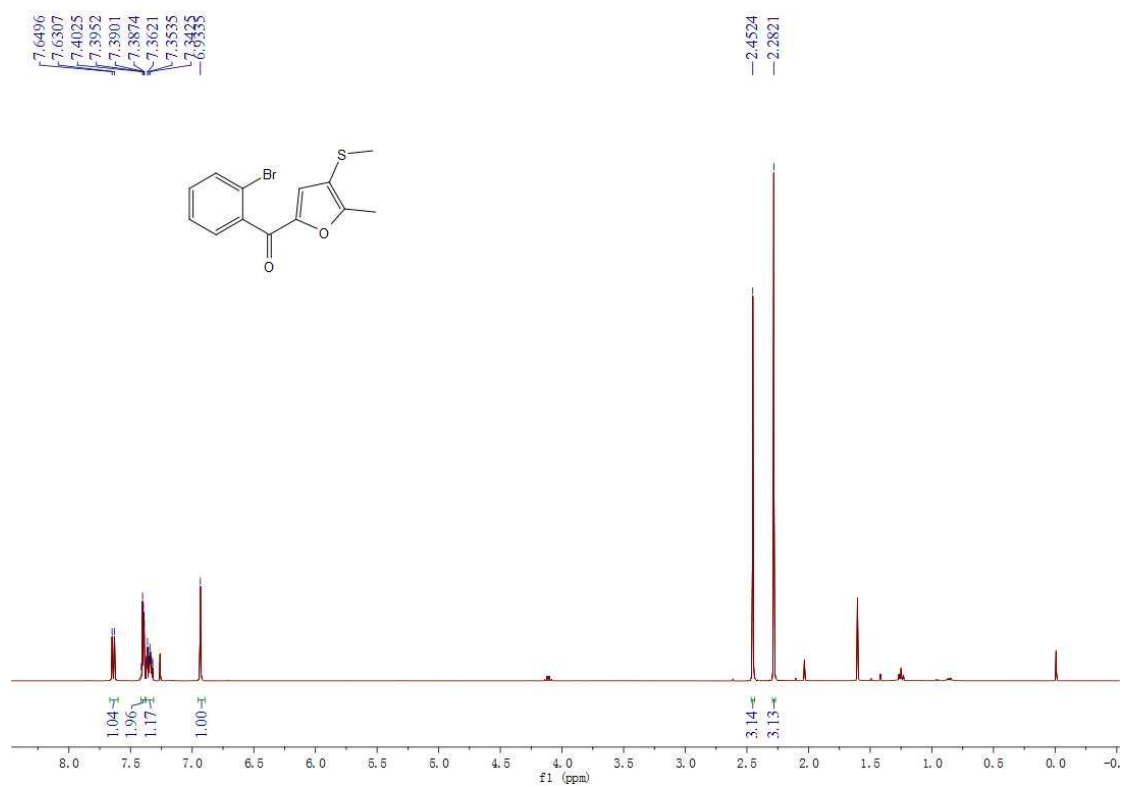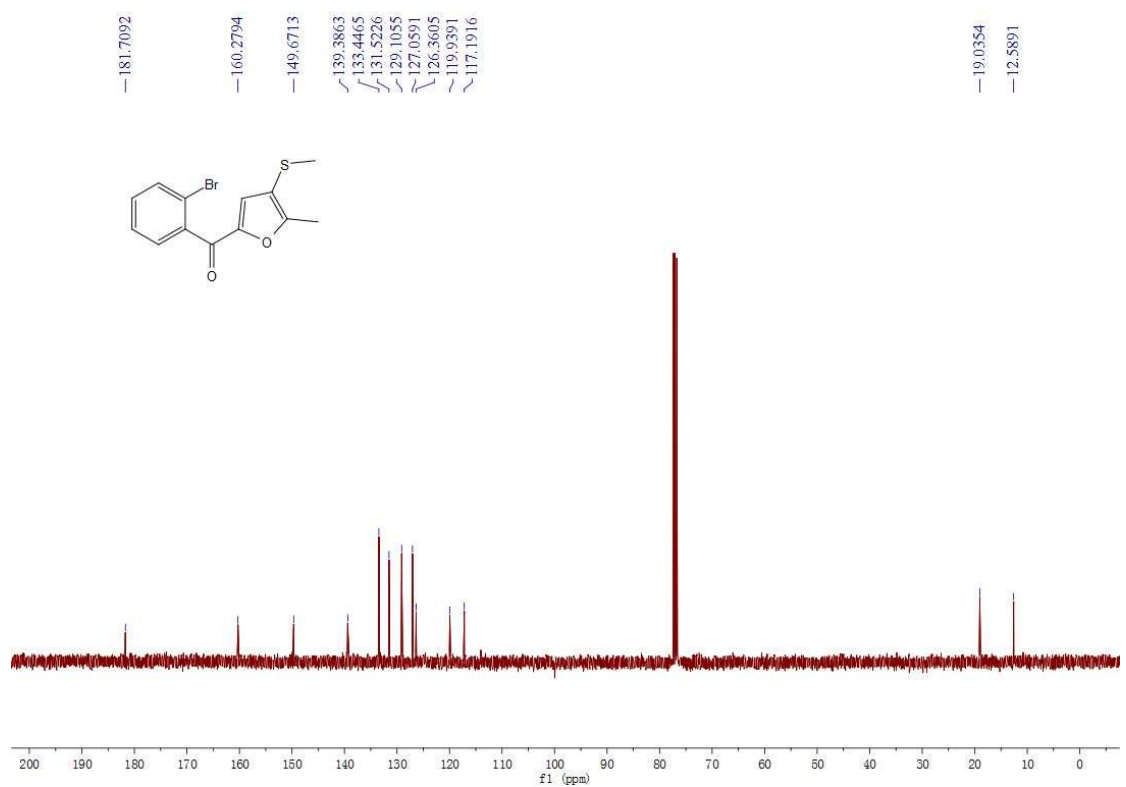

<sup>1</sup>H NMR and <sup>13</sup>C NMR of 1k

7.6721  
7.6524  
7.6005  
7.5991  
7.5794  
7.5780  
7.5030  
7.5002  
7.4940  
7.4891  
7.4851  
7.4821  
7.4756  
7.4708  
7.4641  
7.4611  
7.4428  
7.4400  
7.4244  
7.4215  
7.4060  
7.4028  
7.3915  
7.3866  
7.3720  
7.3675  
7.3533  
7.3487  
7.3149  
7.3131  
7.2951  
7.2887  
7.2871  
7.2773

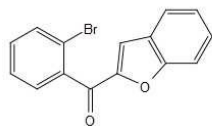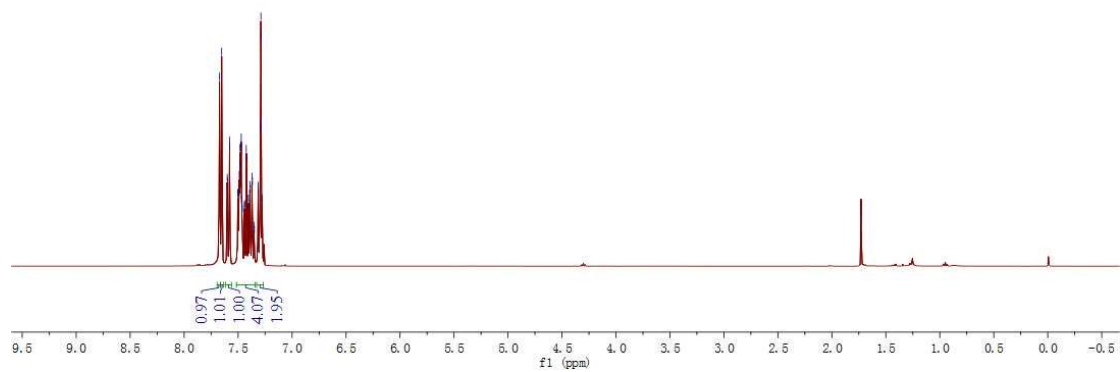

184.5906  
156.4413  
151.6591  
139.3903  
133.5186  
131.8613  
129.2628  
129.0065  
127.2031  
127.0048  
124.1539  
123.5996  
119.9750  
117.9721  
112.6868

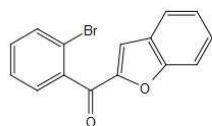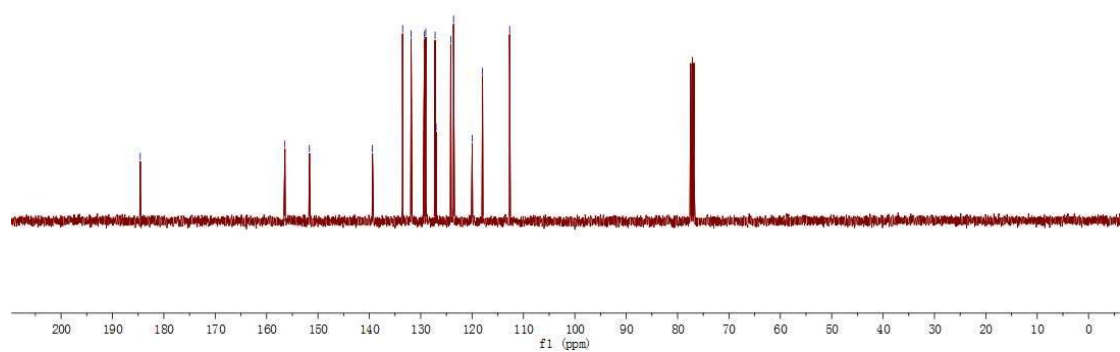

$^1\text{H}$  NMR and  $^{13}\text{C}$  NMR of 11

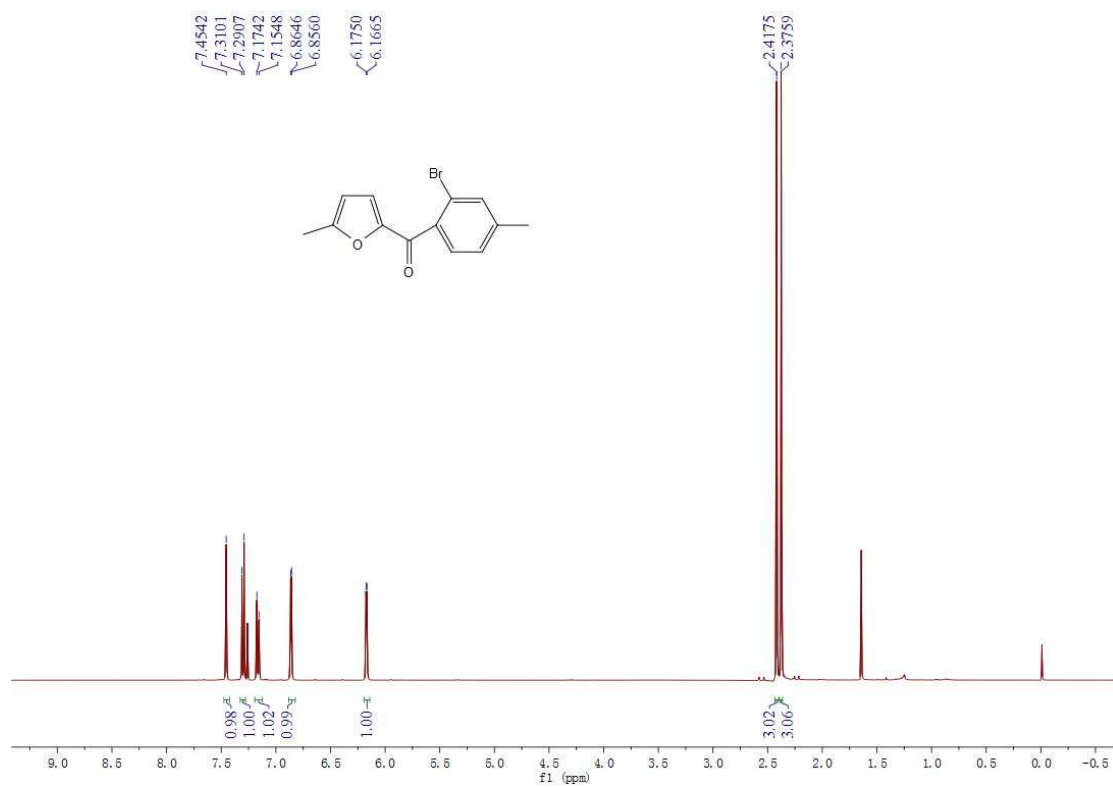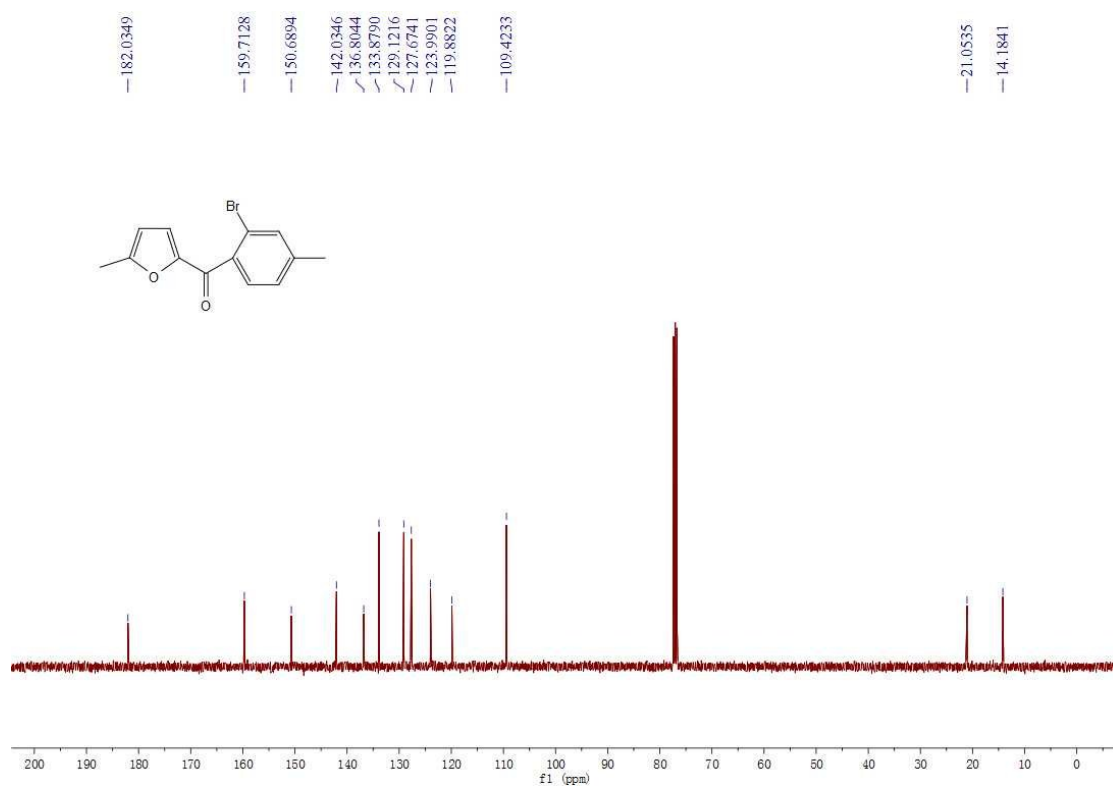

**<sup>1</sup>H NMR and <sup>13</sup>C NMR of 1m**

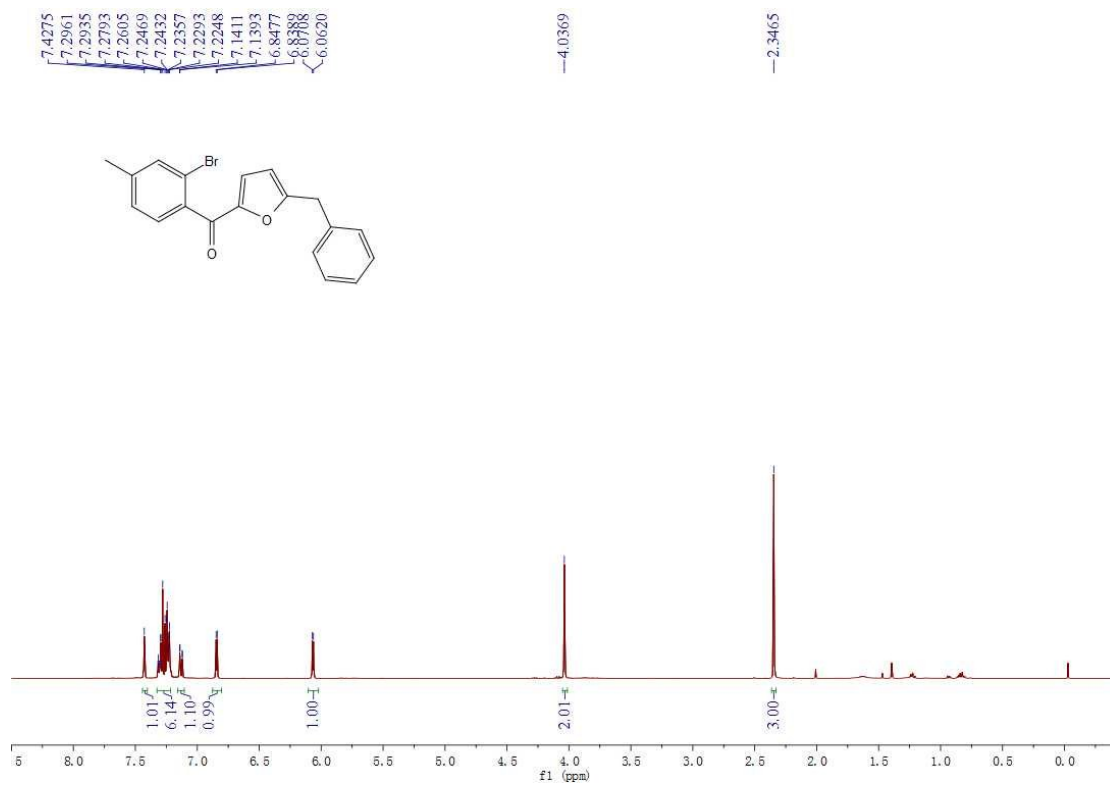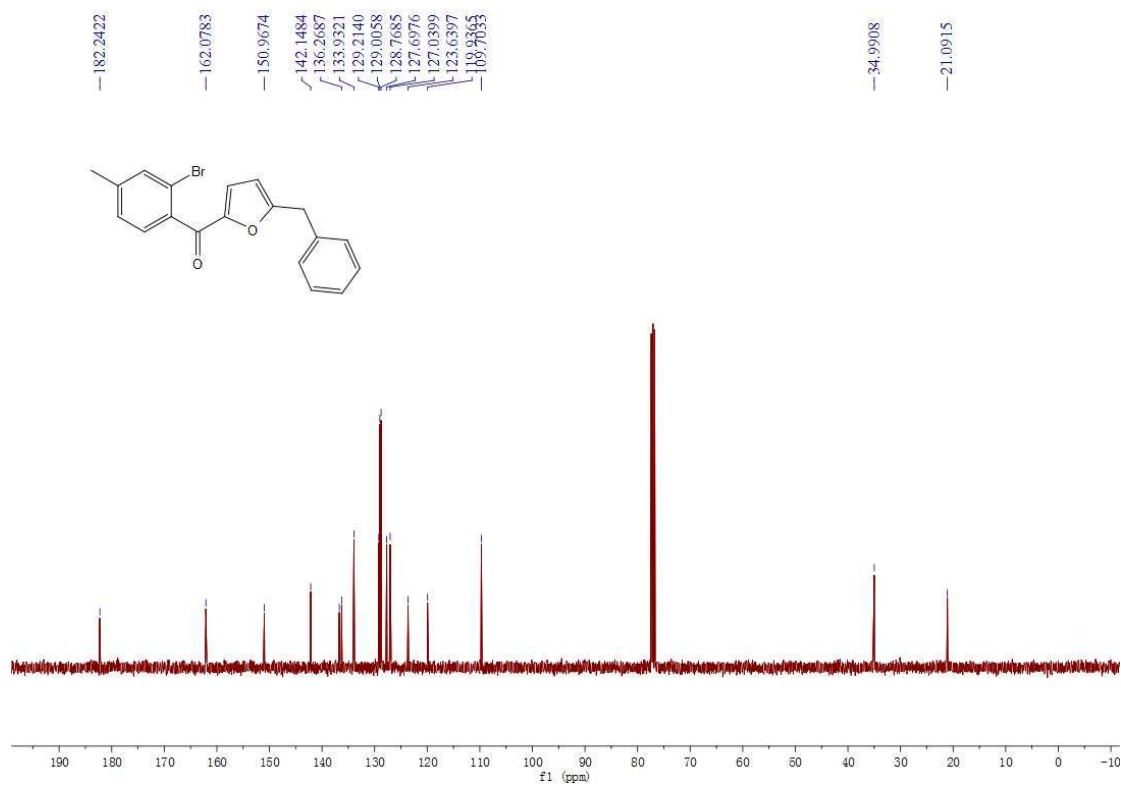

**<sup>1</sup>H NMR and <sup>13</sup>C NMR of 1n**

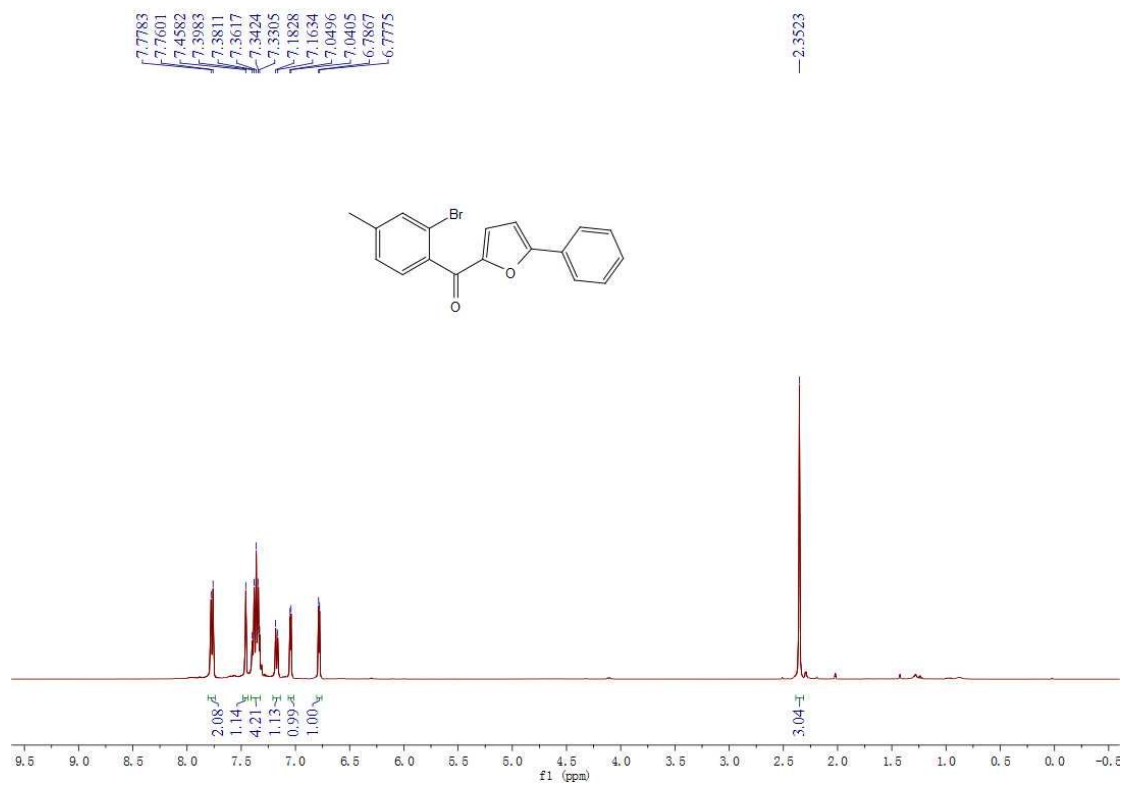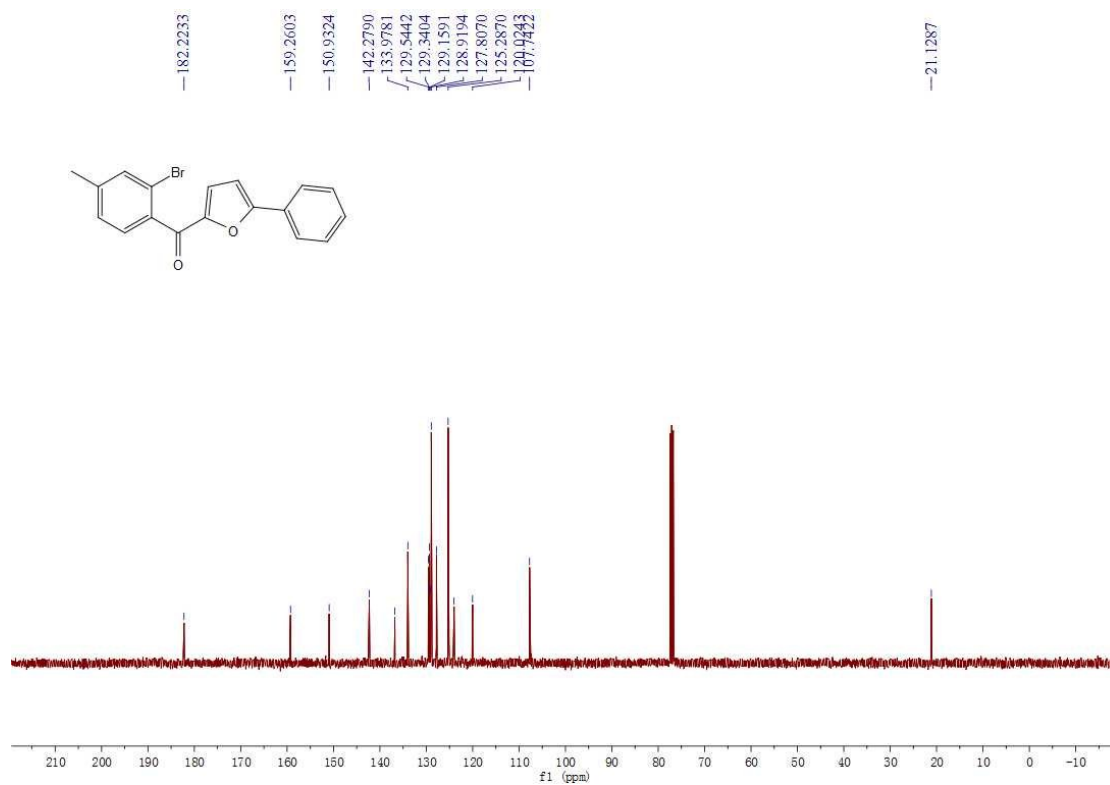

**<sup>1</sup>H NMR and <sup>13</sup>C NMR of 1o**

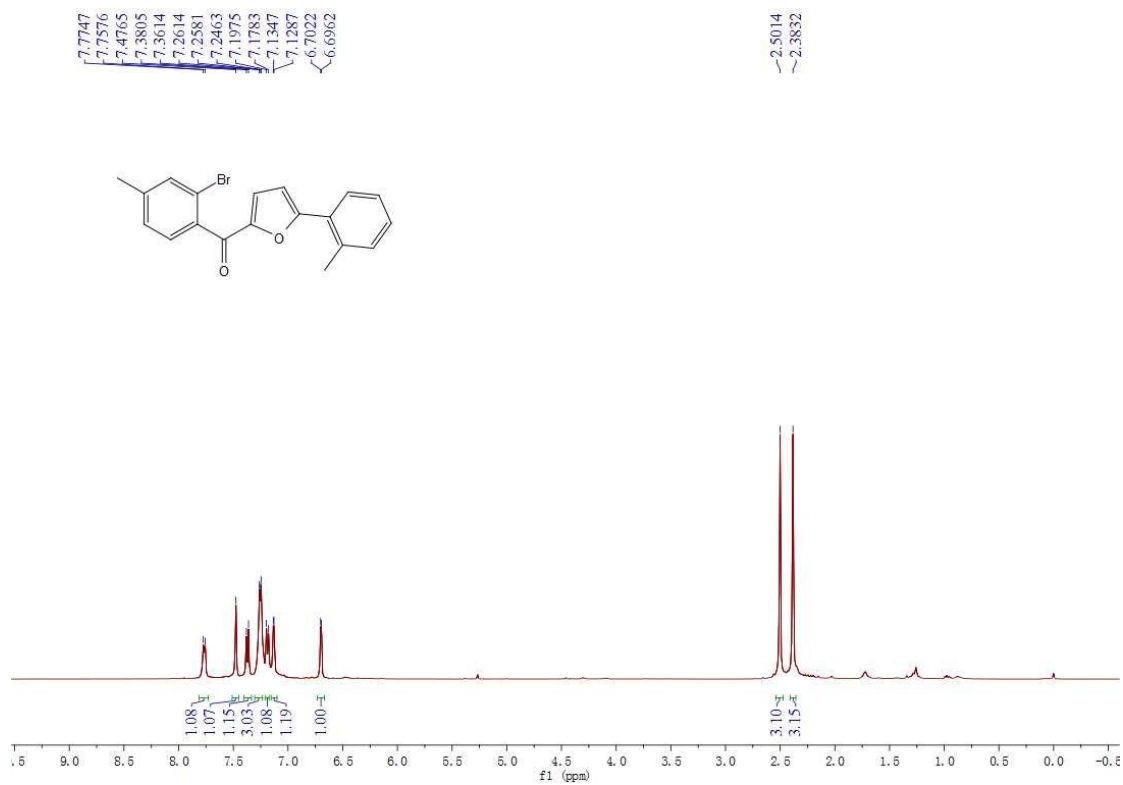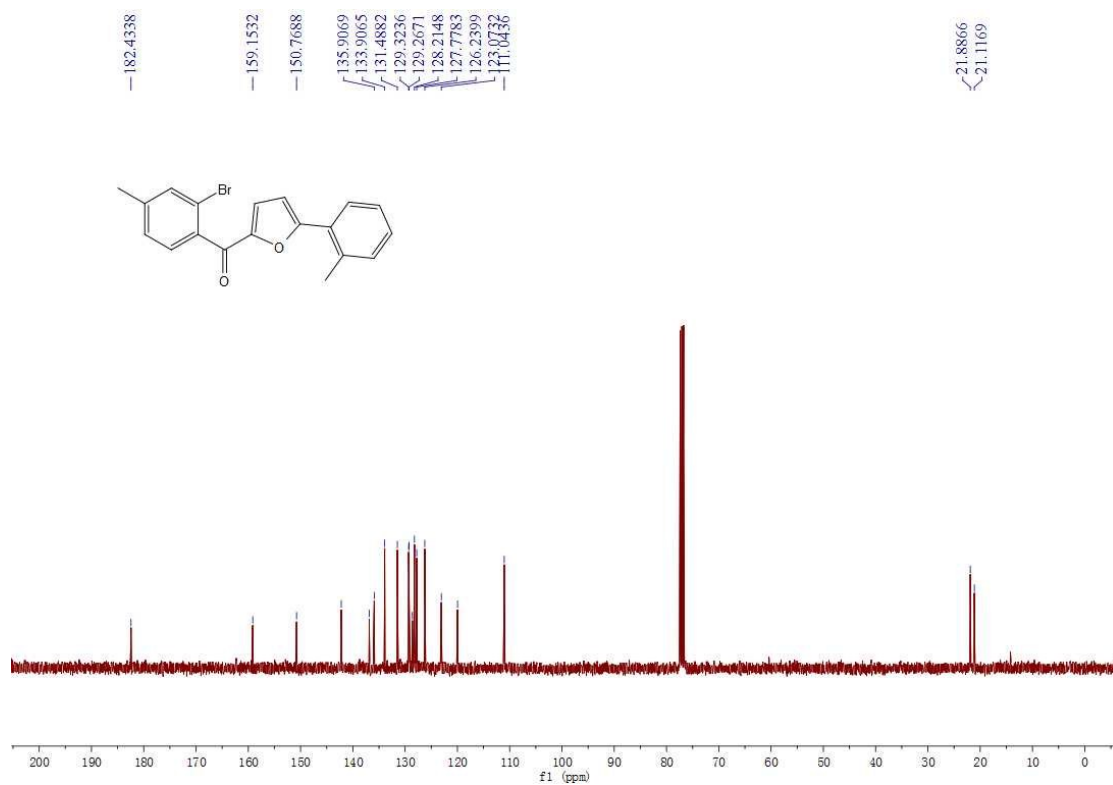

**<sup>1</sup>H NMR and <sup>13</sup>C NMR of 1p**

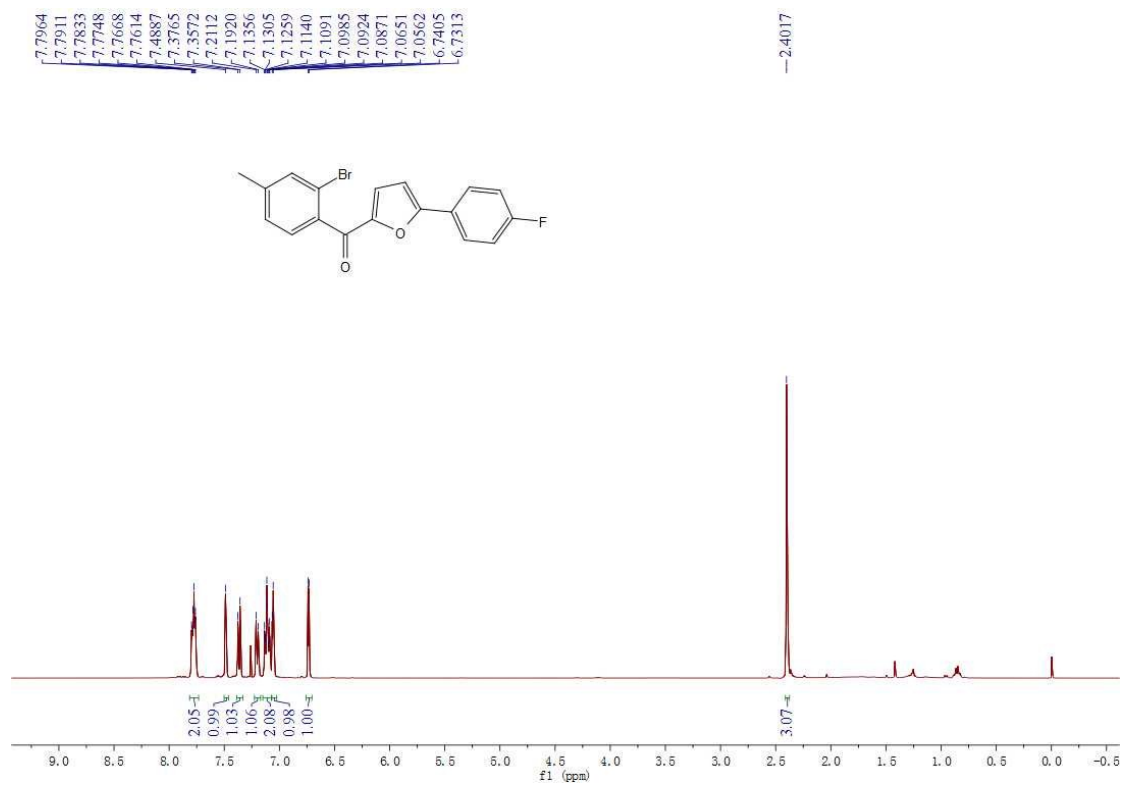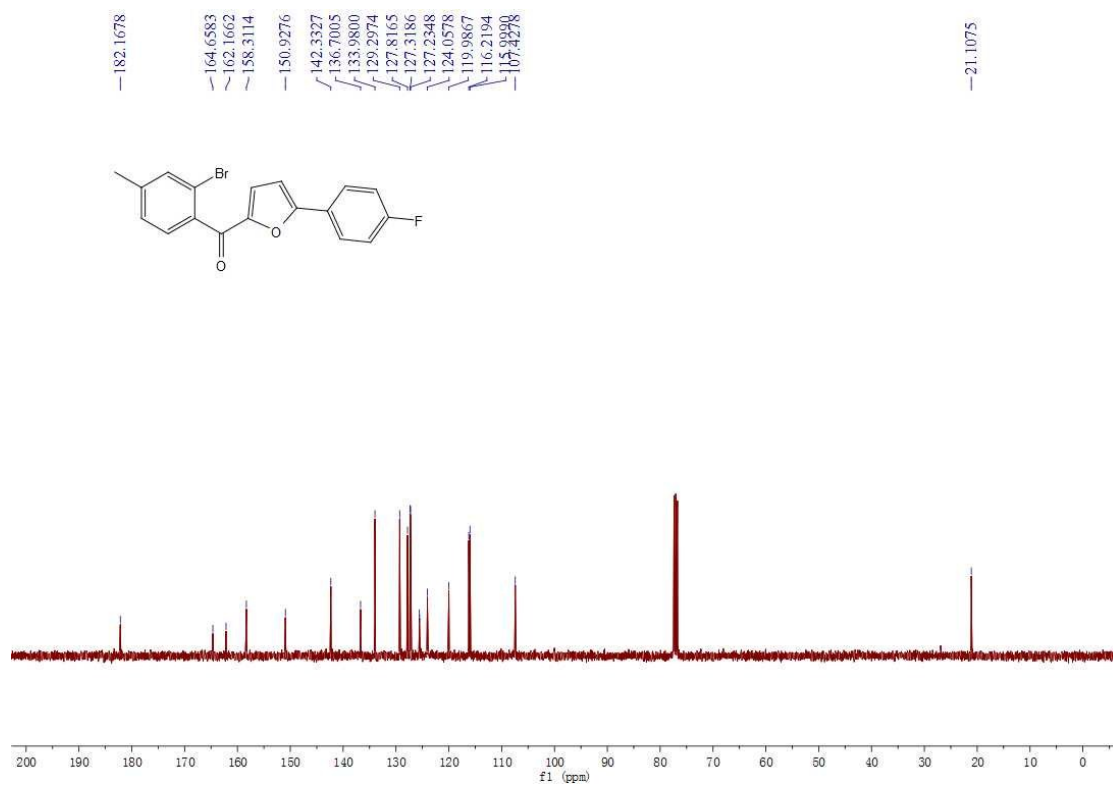

<sup>1</sup>H NMR and <sup>13</sup>C NMR of 1r

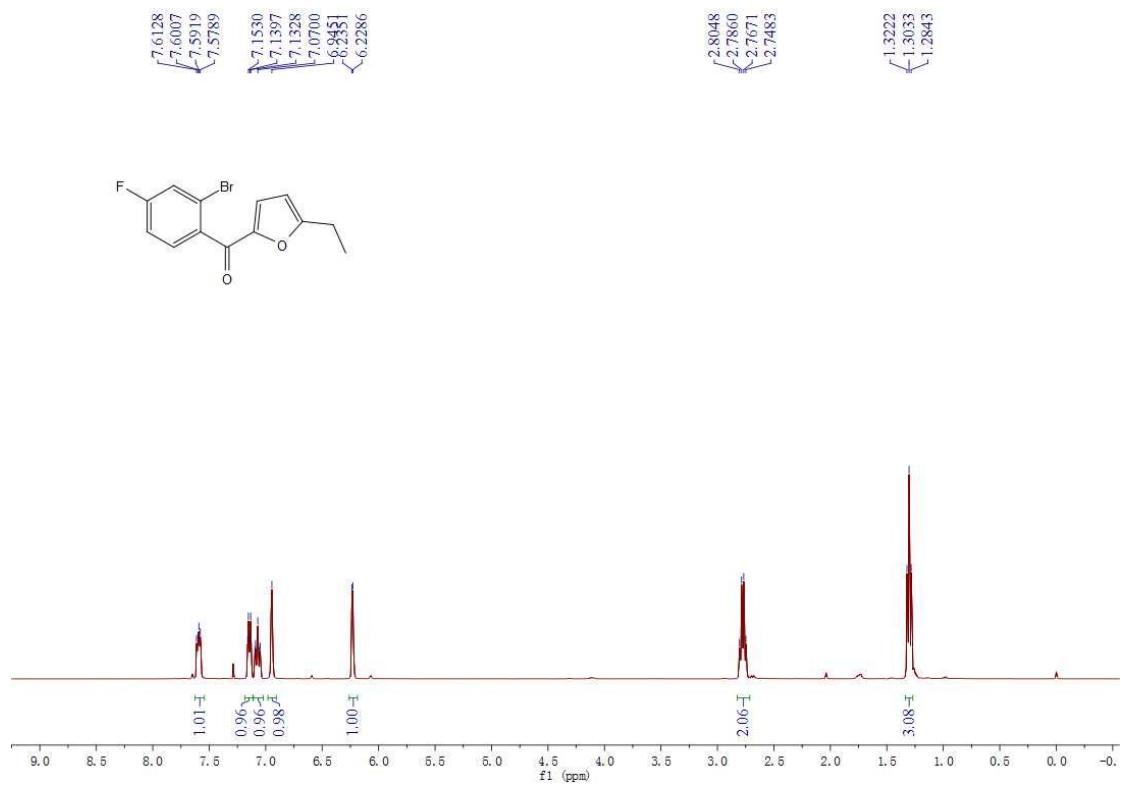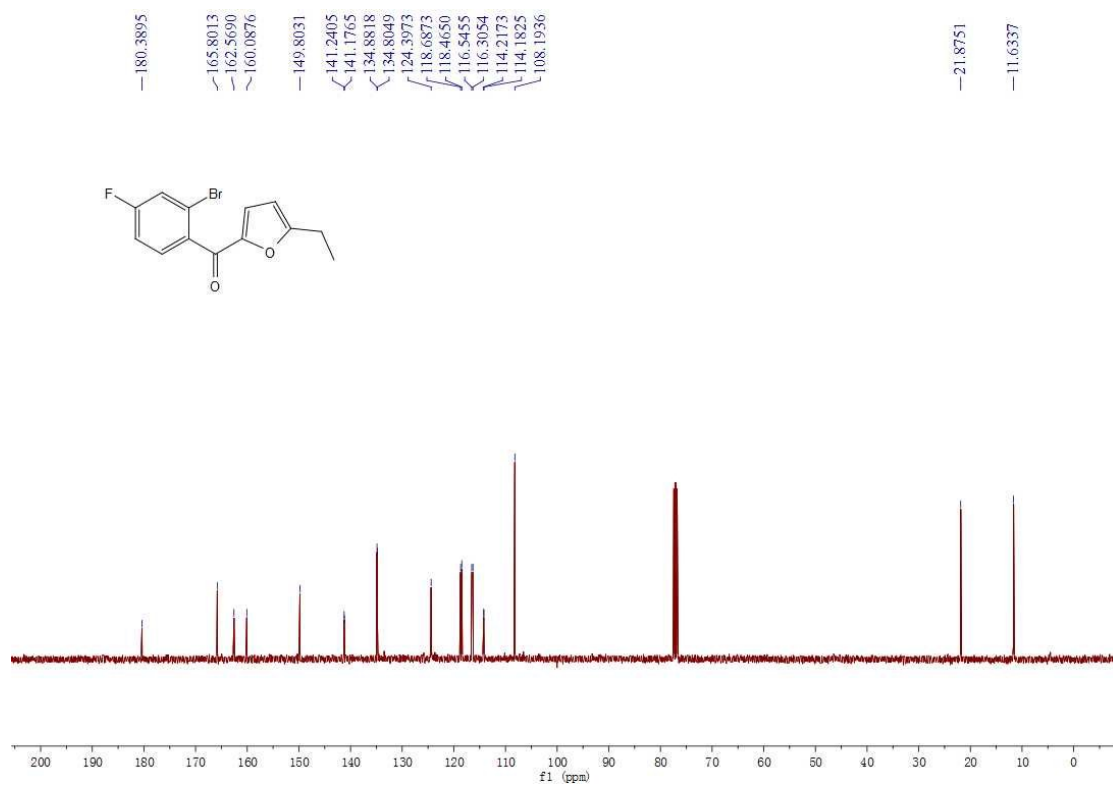

**<sup>1</sup>H NMR and <sup>13</sup>C NMR of 4a**



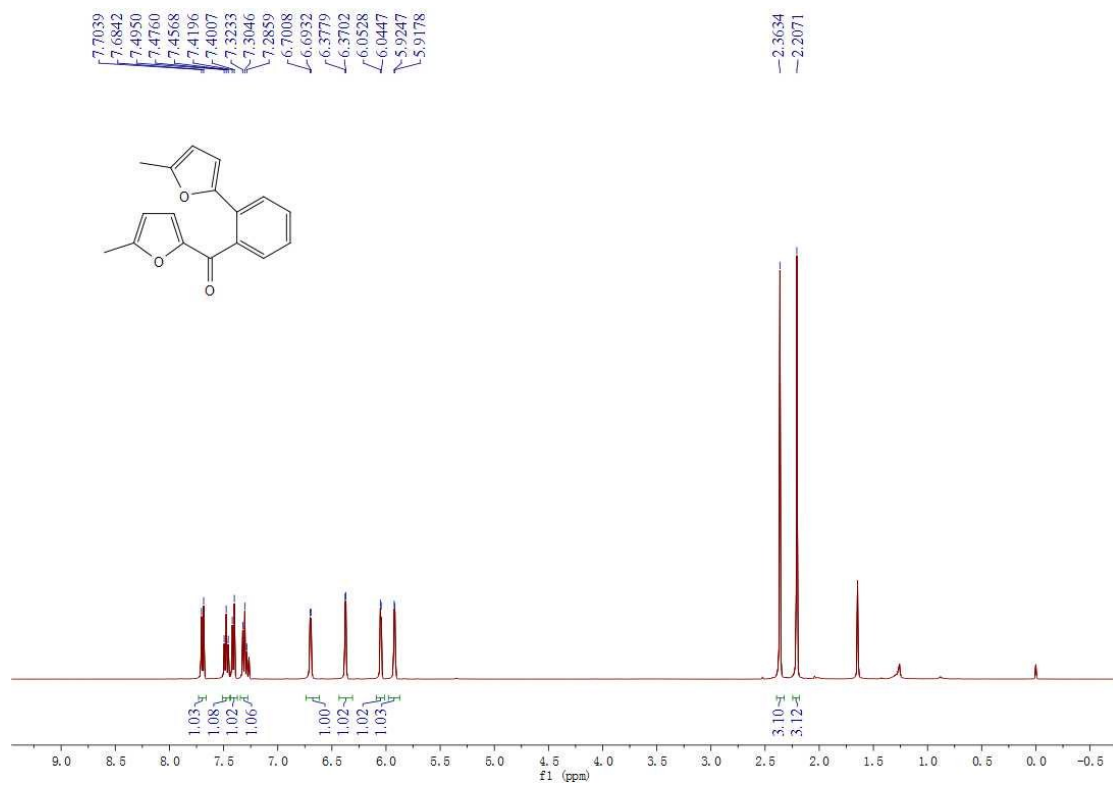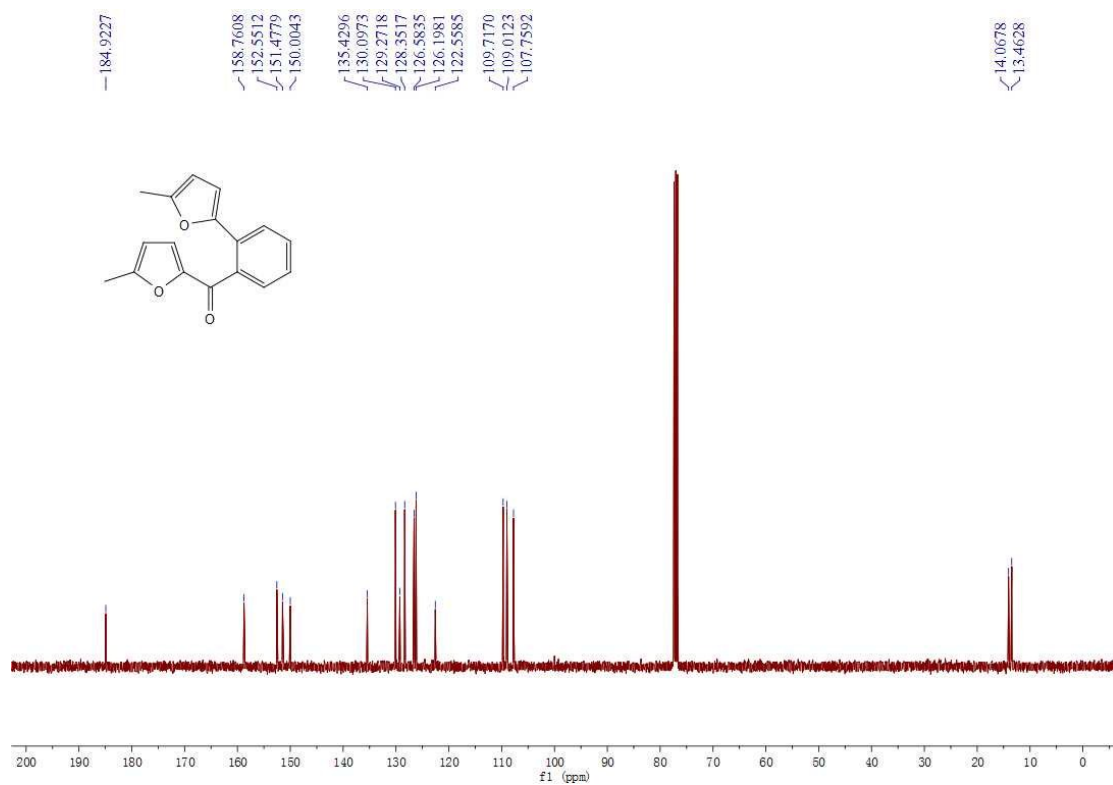

**<sup>1</sup>H NMR and <sup>13</sup>C NMR of 4b**

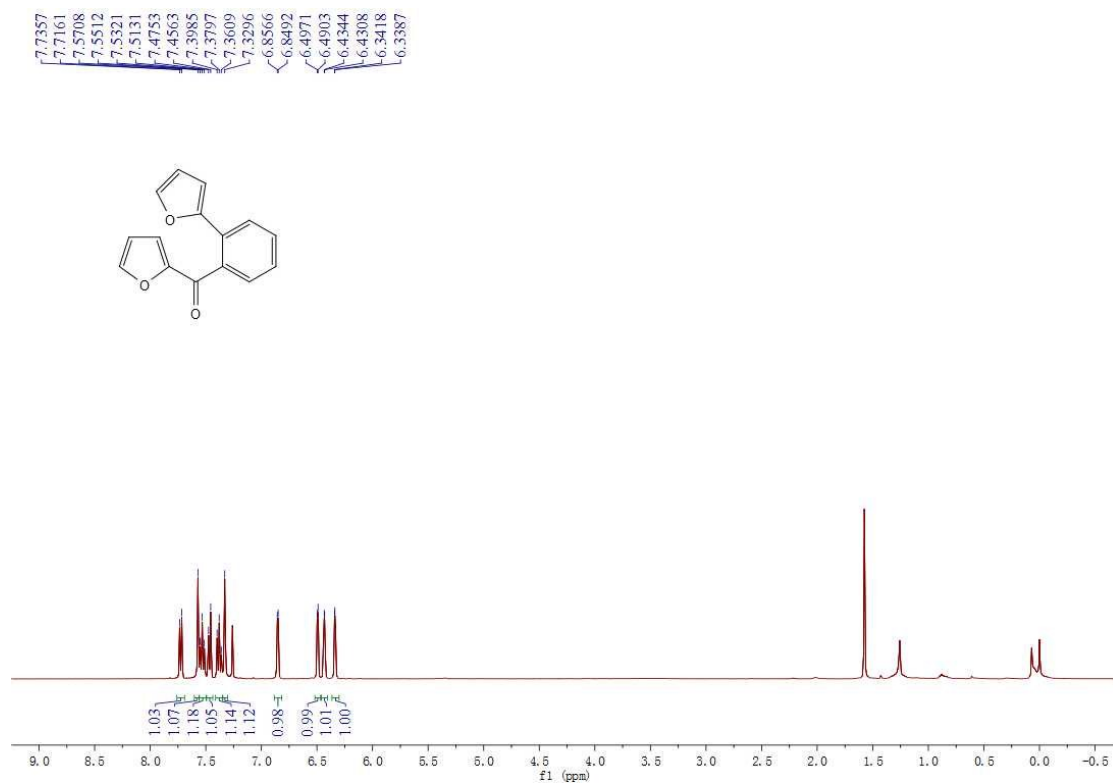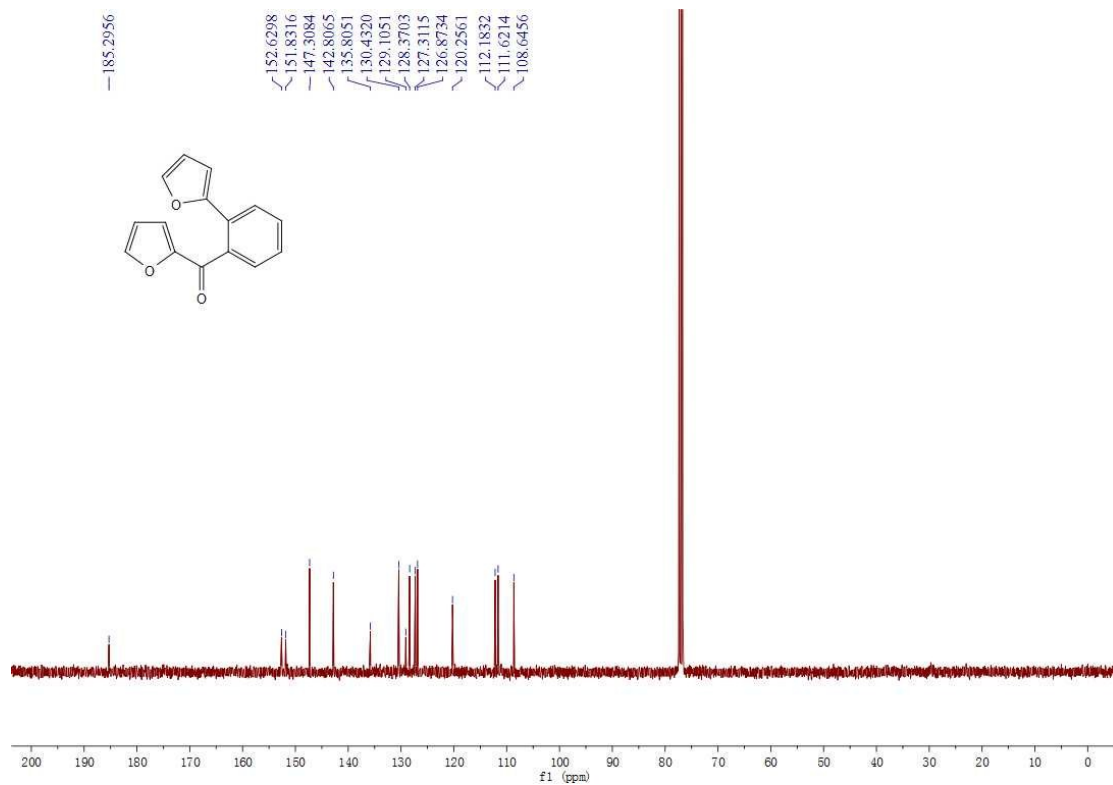

**$^1\text{H}$  NMR and  $^{13}\text{C}$  NMR of 4c**

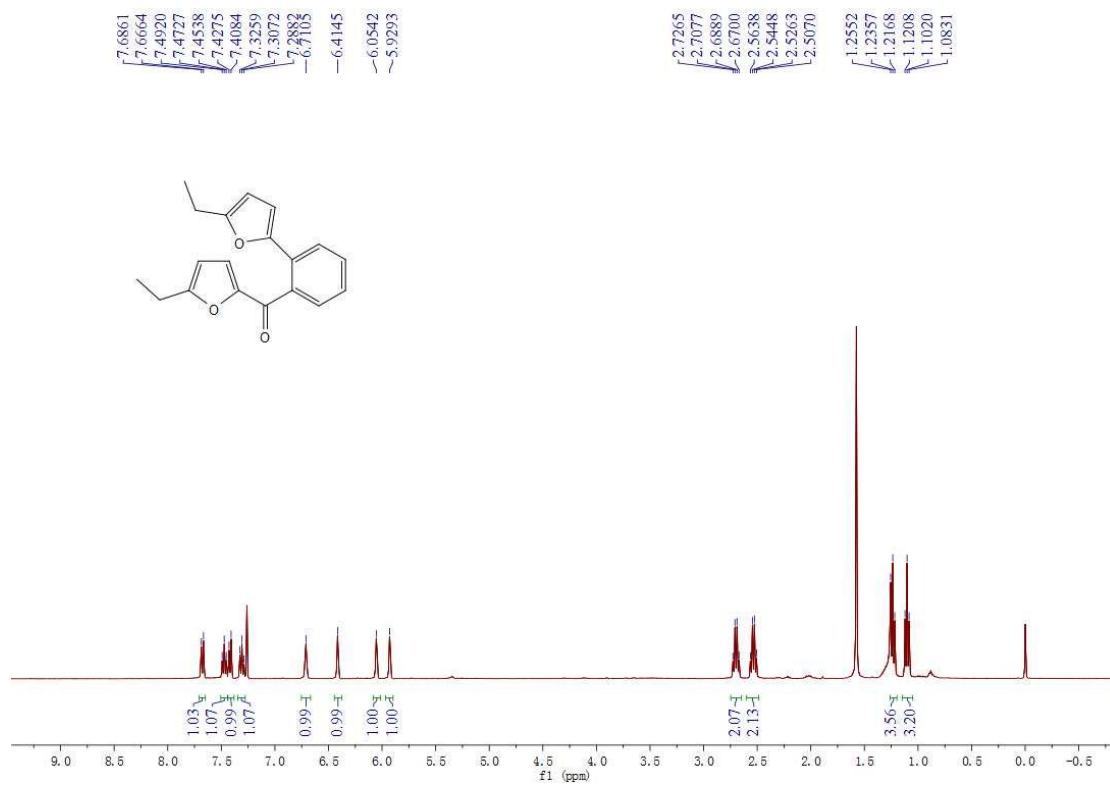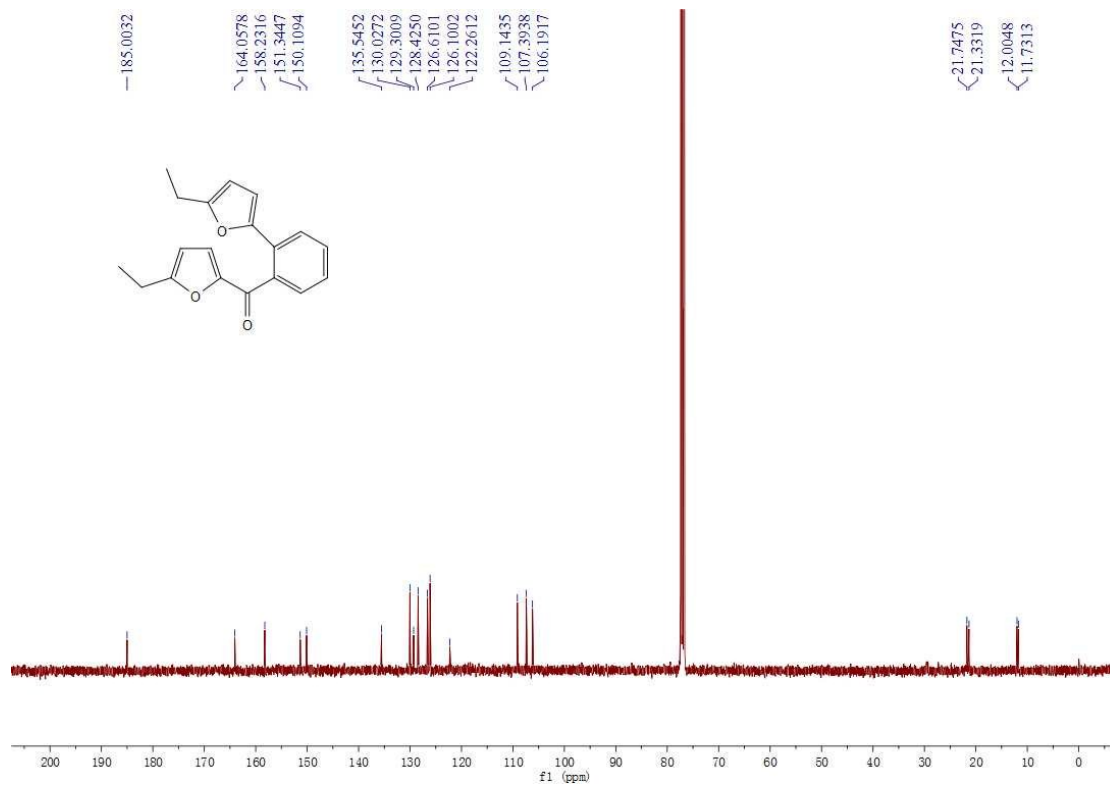

**<sup>1</sup>H NMR and <sup>13</sup>C NMR of 4d**

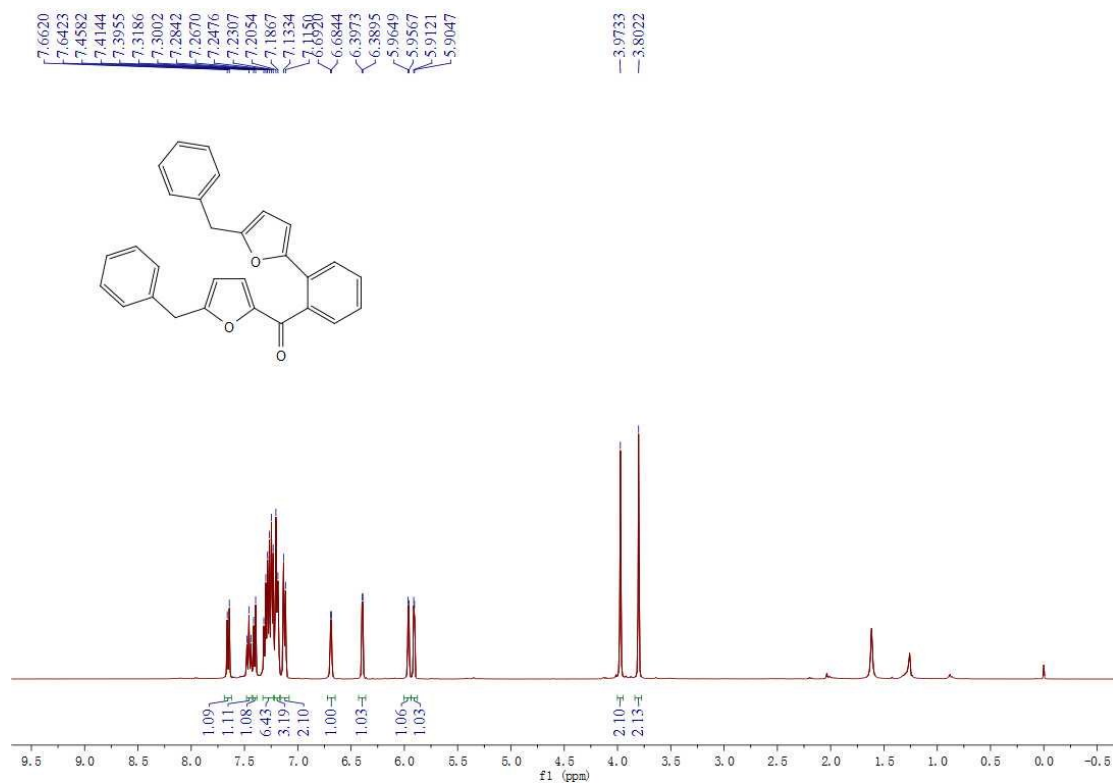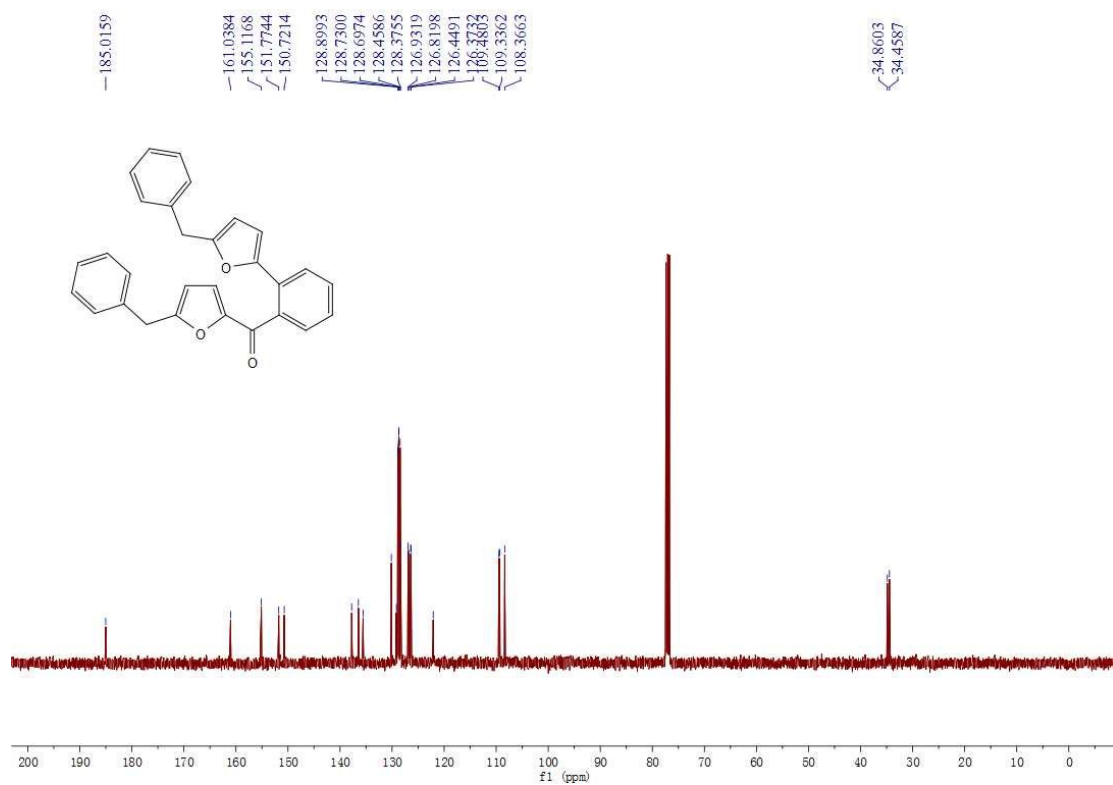

**<sup>1</sup>H NMR and <sup>13</sup>C NMR of 4e**

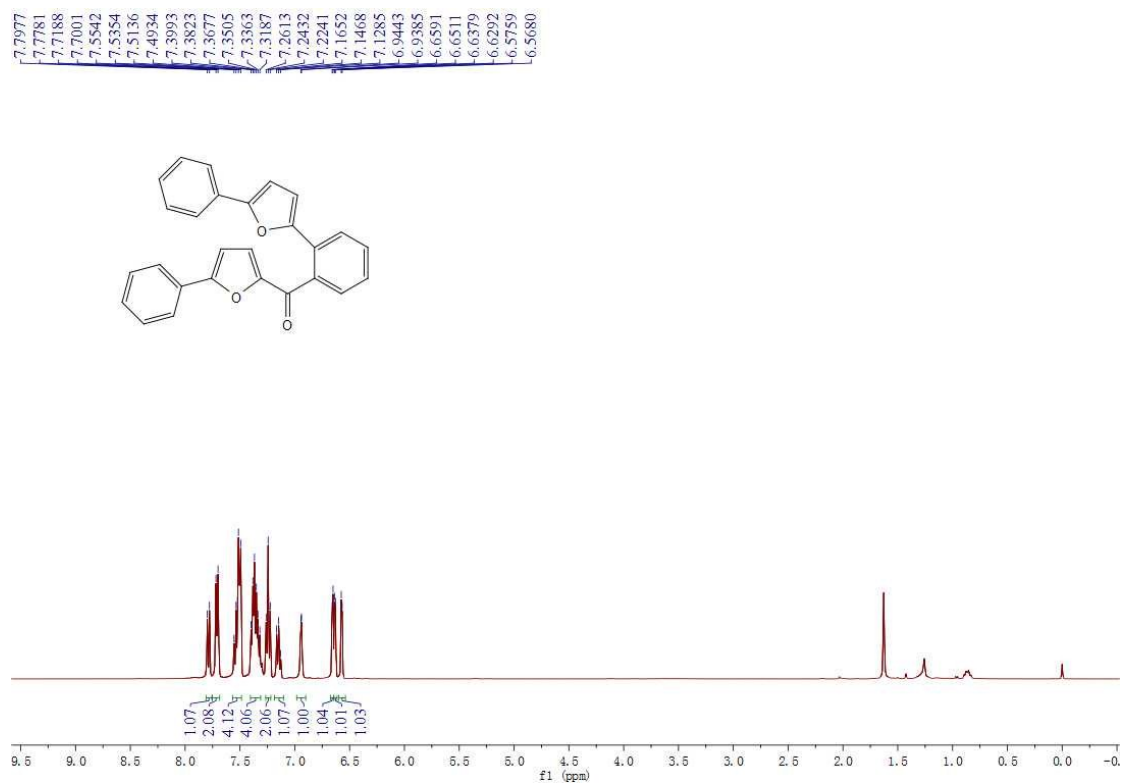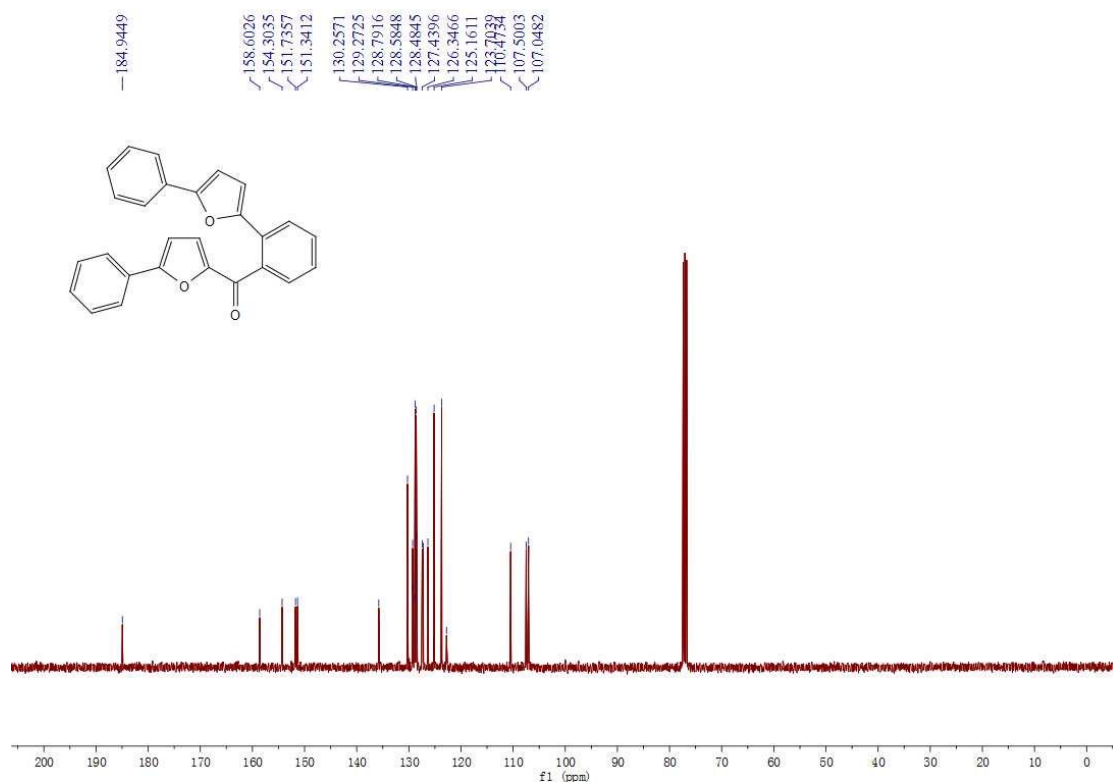

$^1\text{H}$  NMR and  $^{13}\text{C}$  NMR of 4f

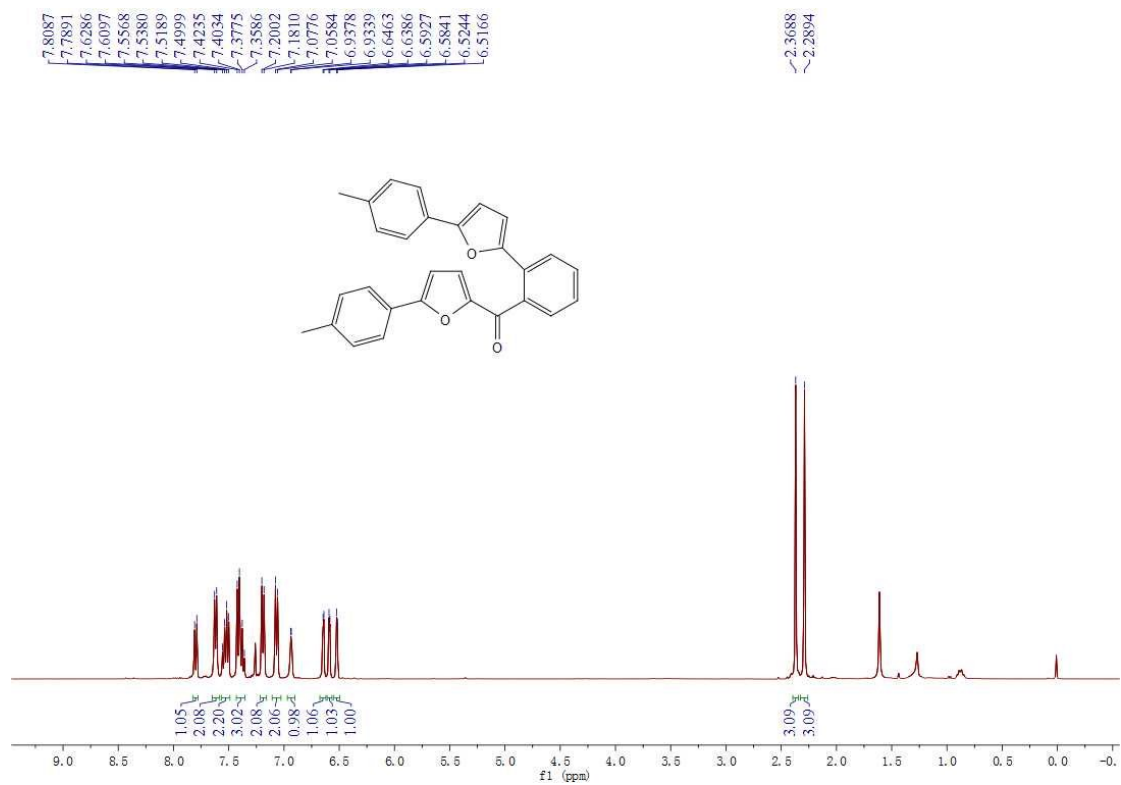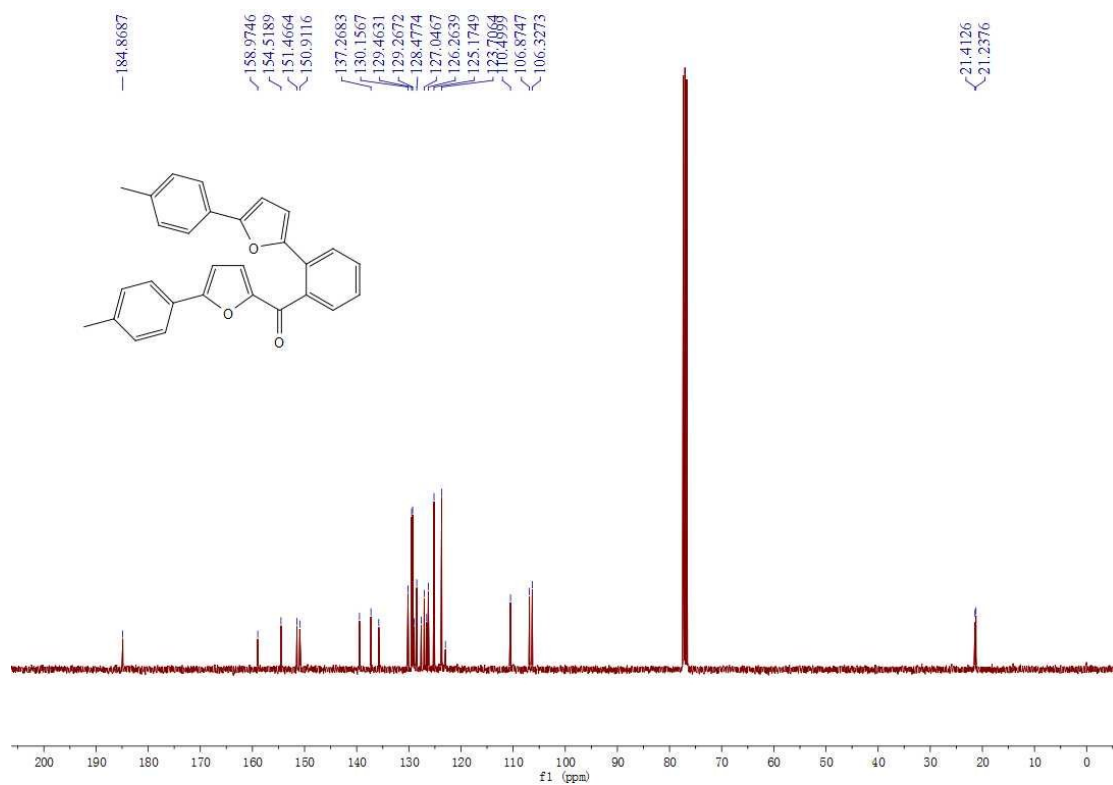

<sup>1</sup>H NMR and <sup>13</sup>C NMR of 4g

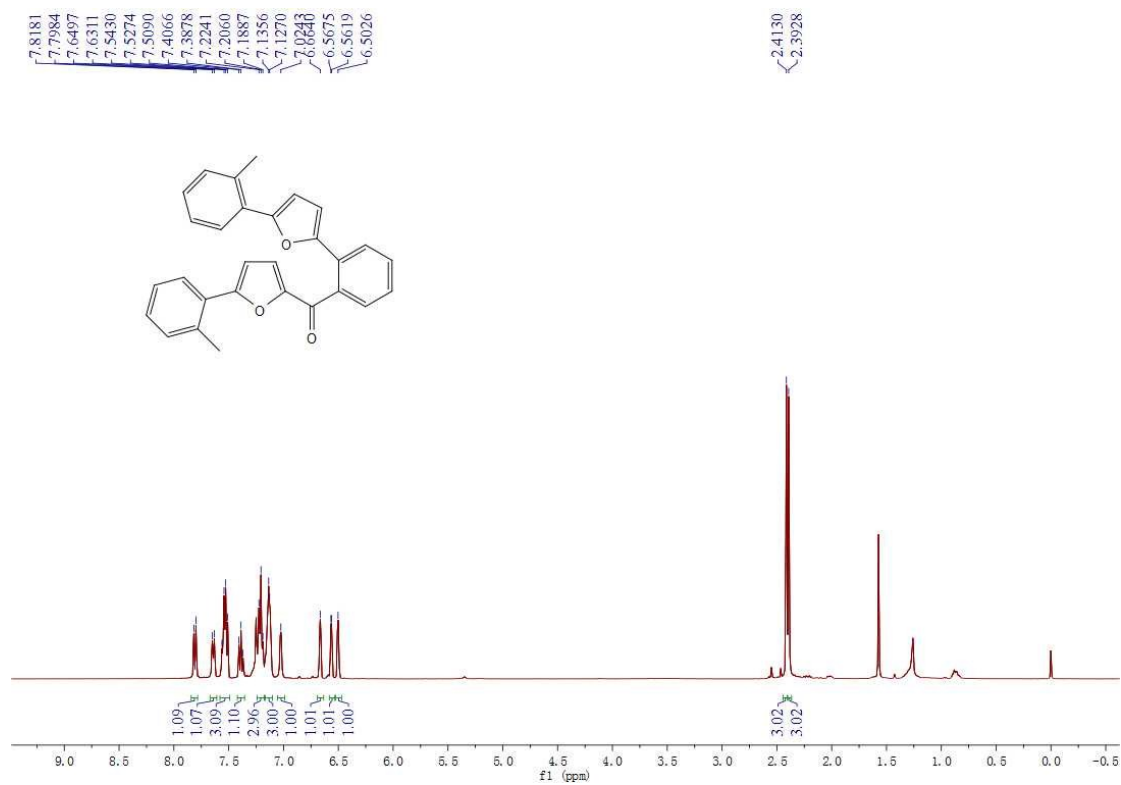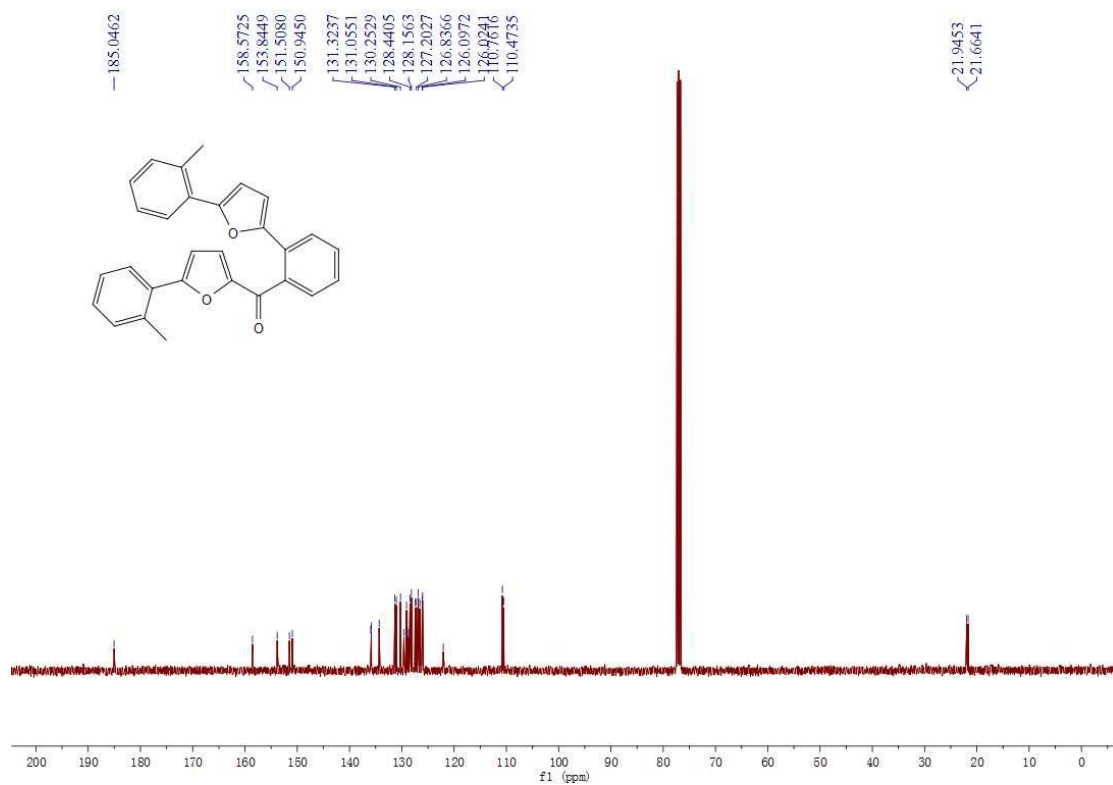

<sup>1</sup>H NMR and <sup>13</sup>C NMR of 4h

7.7774  
7.7577  
7.6943  
7.6799  
7.6620  
7.5647  
7.5458  
7.5263  
7.5070  
7.4729  
7.4592  
7.4545  
7.4408  
7.4148  
7.3961  
7.3773  
7.0935  
7.0734  
7.0527  
6.9600  
6.9393  
6.9195  
6.6531  
6.6453  
6.5807  
6.5727  
6.5119  
6.5045

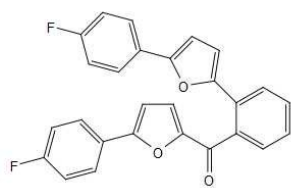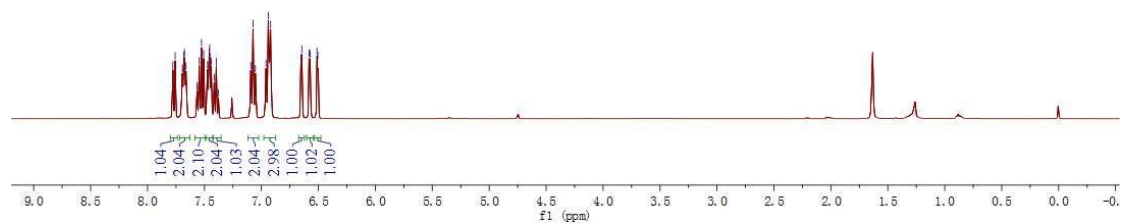

184.8615  
164.5398  
163.4024  
162.0509  
160.9419  
157.6100  
153.4260  
151.7156  
151.3886  
135.6552  
130.3461  
128.7812  
128.5162  
127.3544  
127.0888  
127.0055  
126.6258  
126.5931  
126.3286  
125.5575  
125.5242  
125.4808  
125.4005  
122.6712  
116.1248  
115.9048  
115.7236  
115.5053  
110.3800  
107.1471  
106.6737

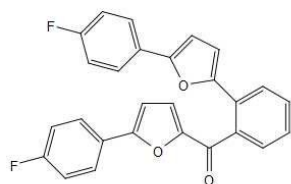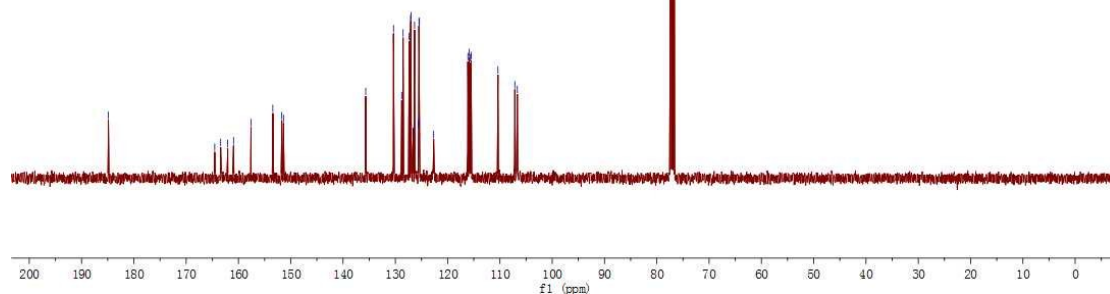

$^1\text{H}$  NMR and  $^{13}\text{C}$  NMR of 4l



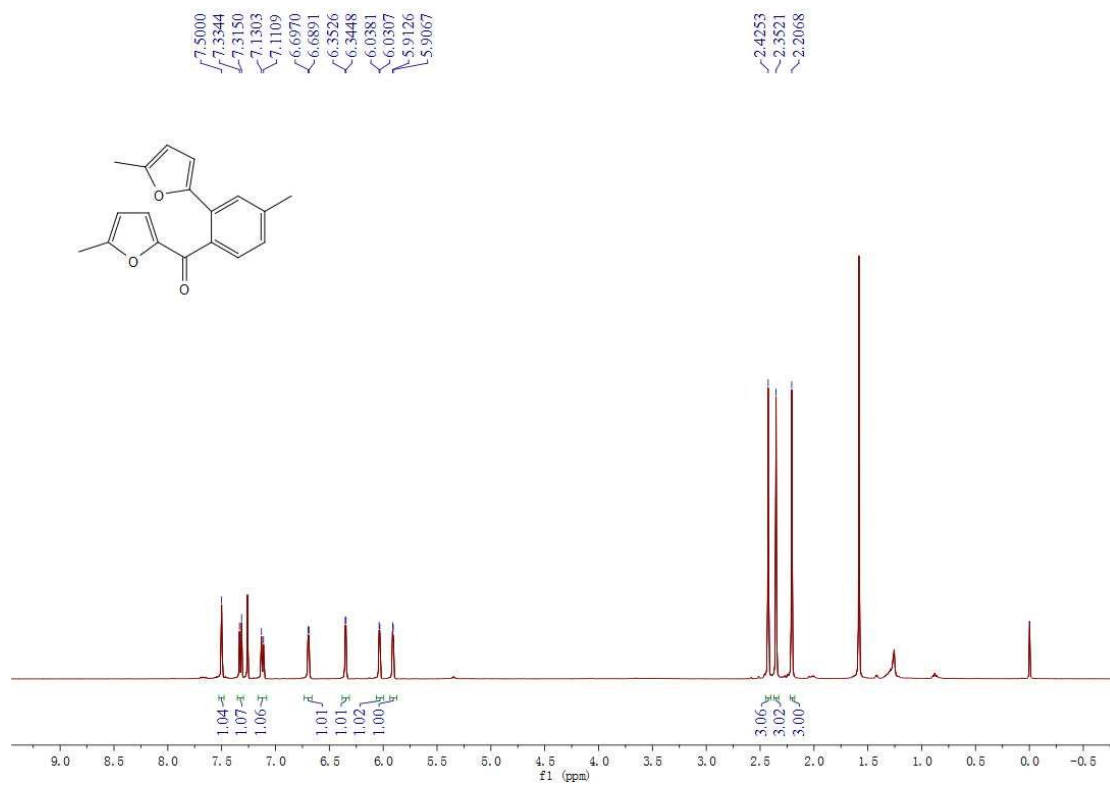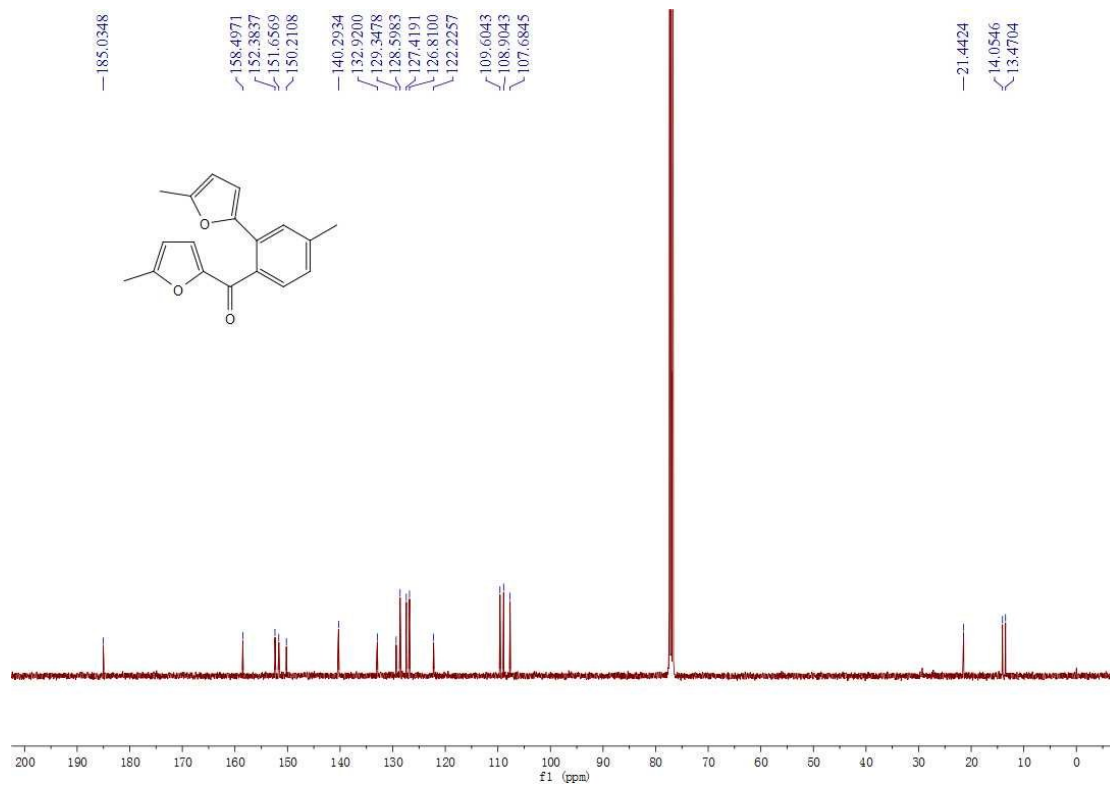

**<sup>1</sup>H NMR and <sup>13</sup>C NMR of 4m**

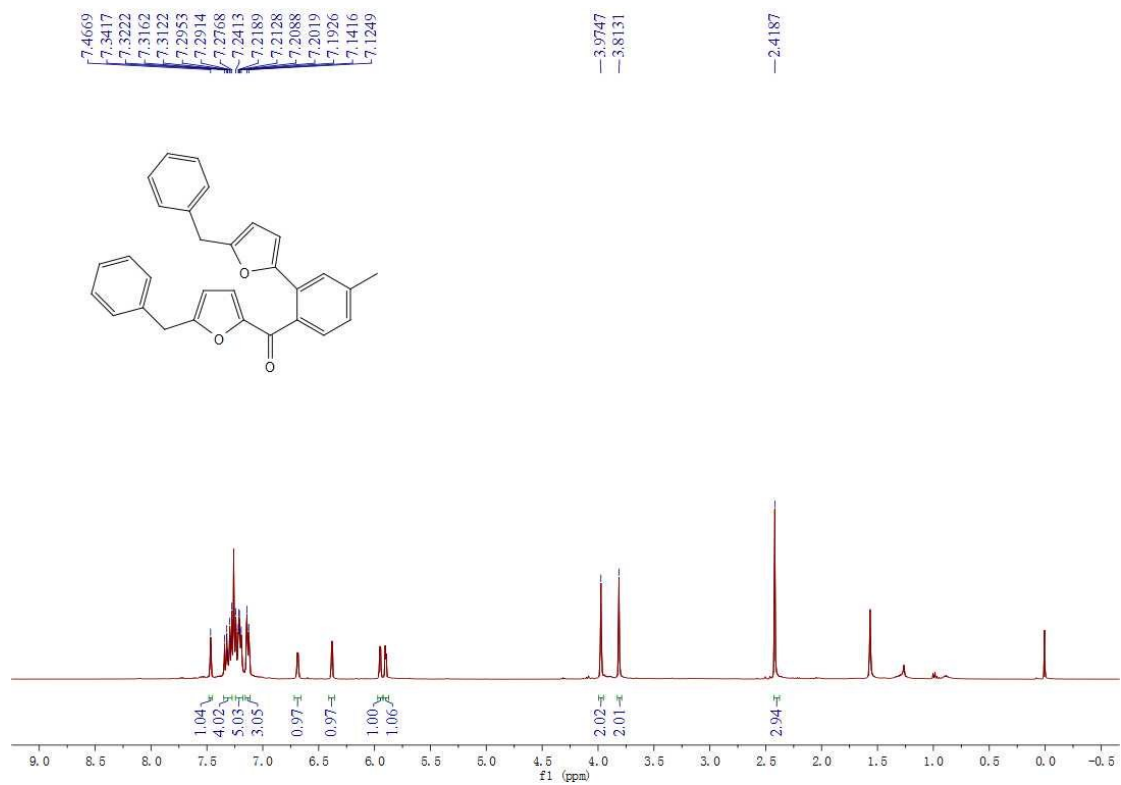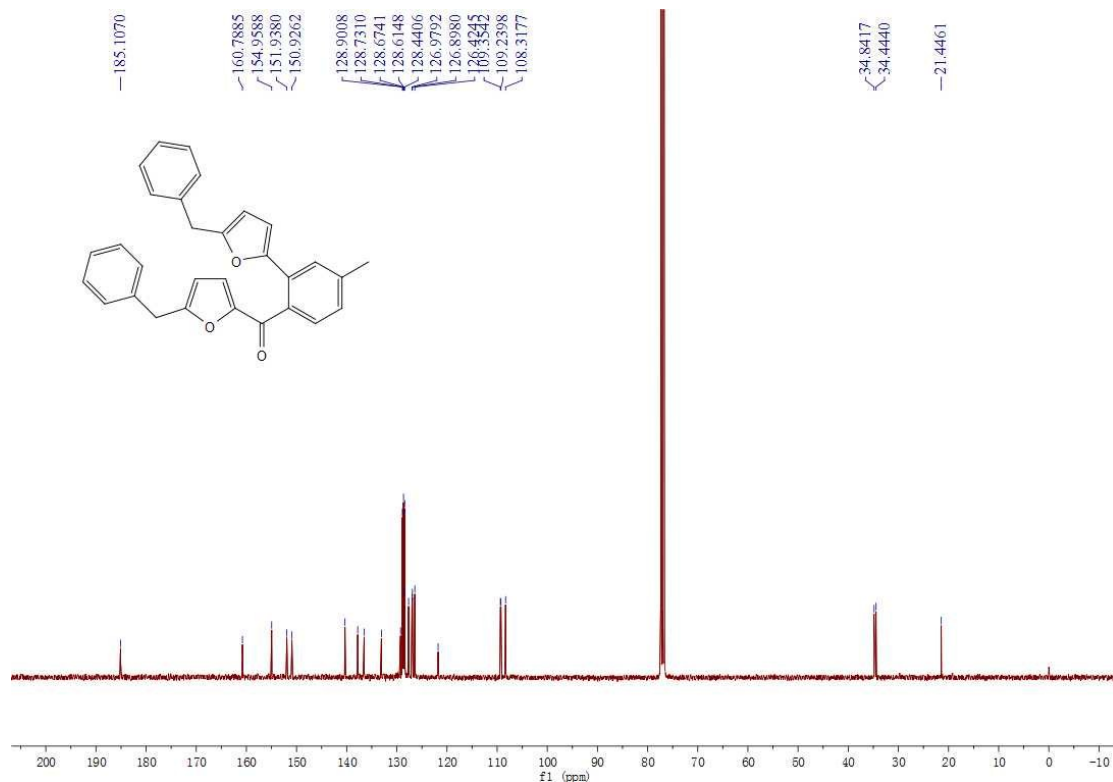

**<sup>1</sup>H NMR and <sup>13</sup>C NMR of 4n**

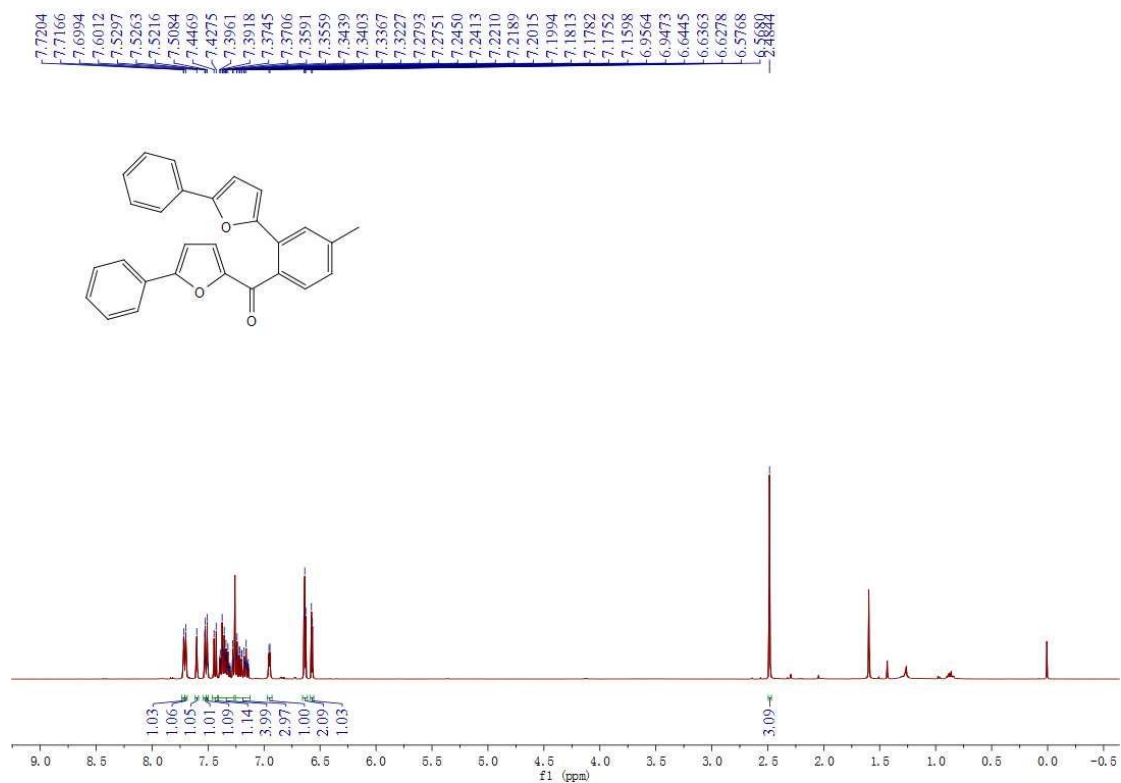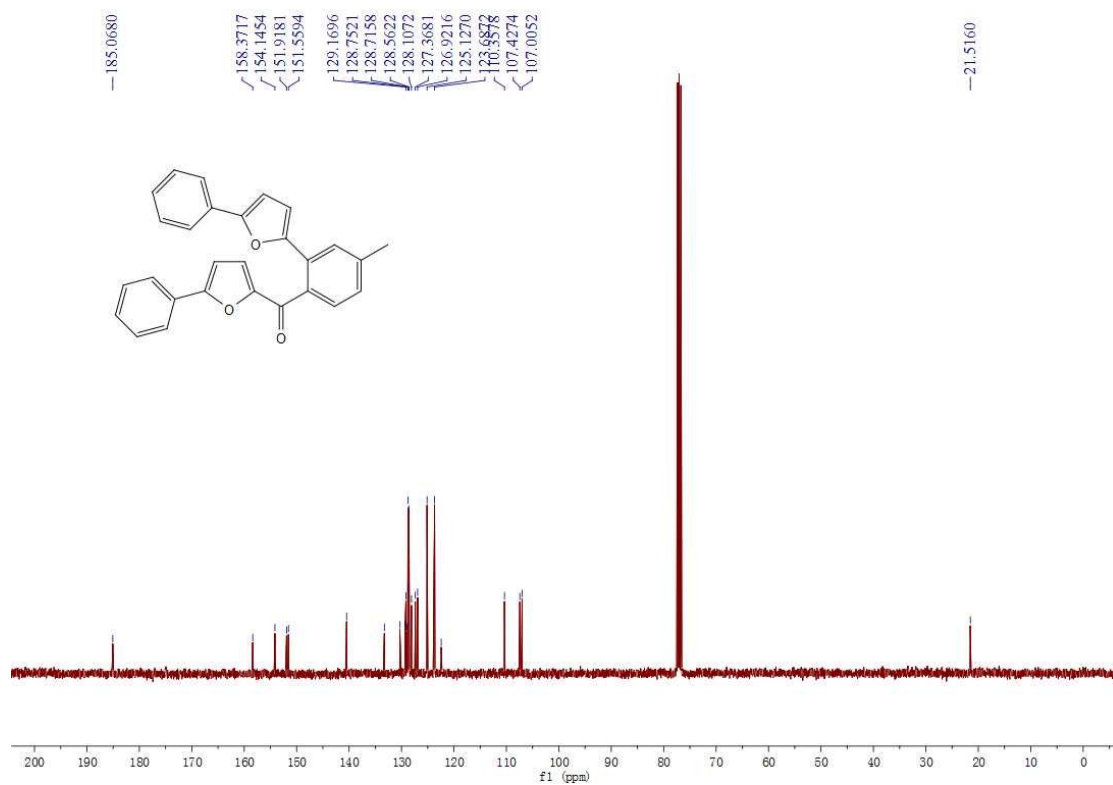

**<sup>1</sup>H NMR and <sup>13</sup>C NMR of 4o**

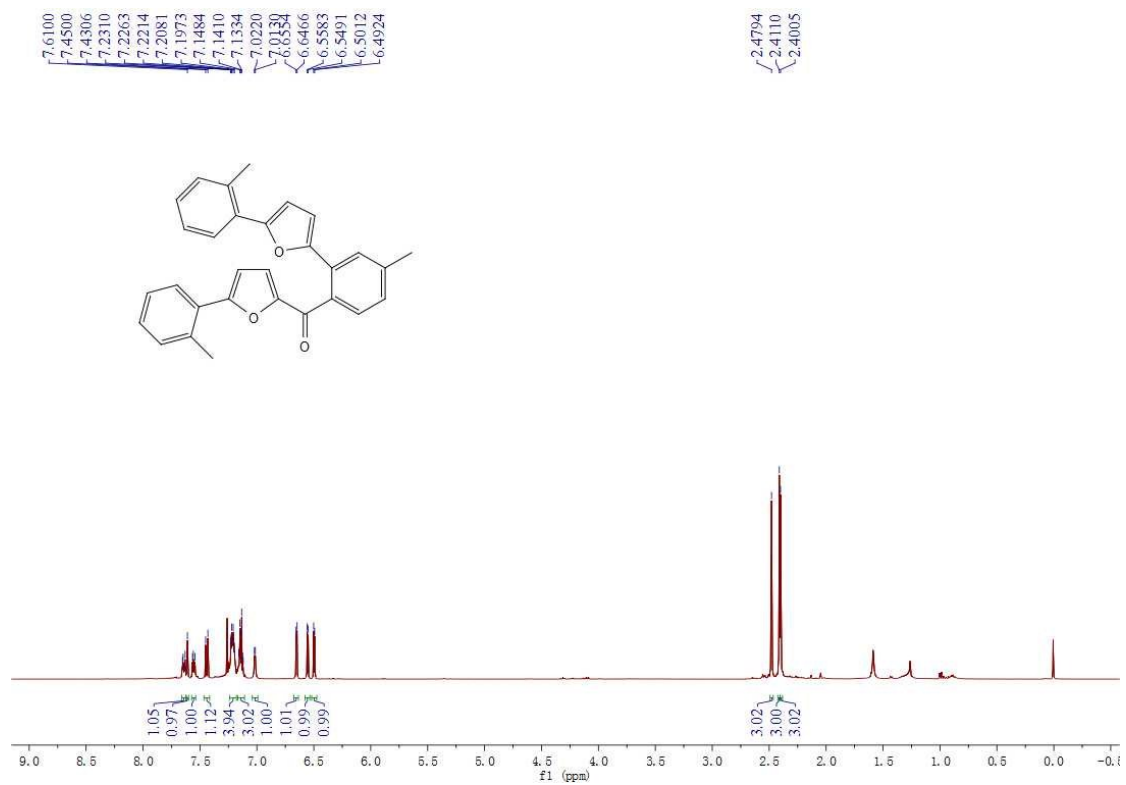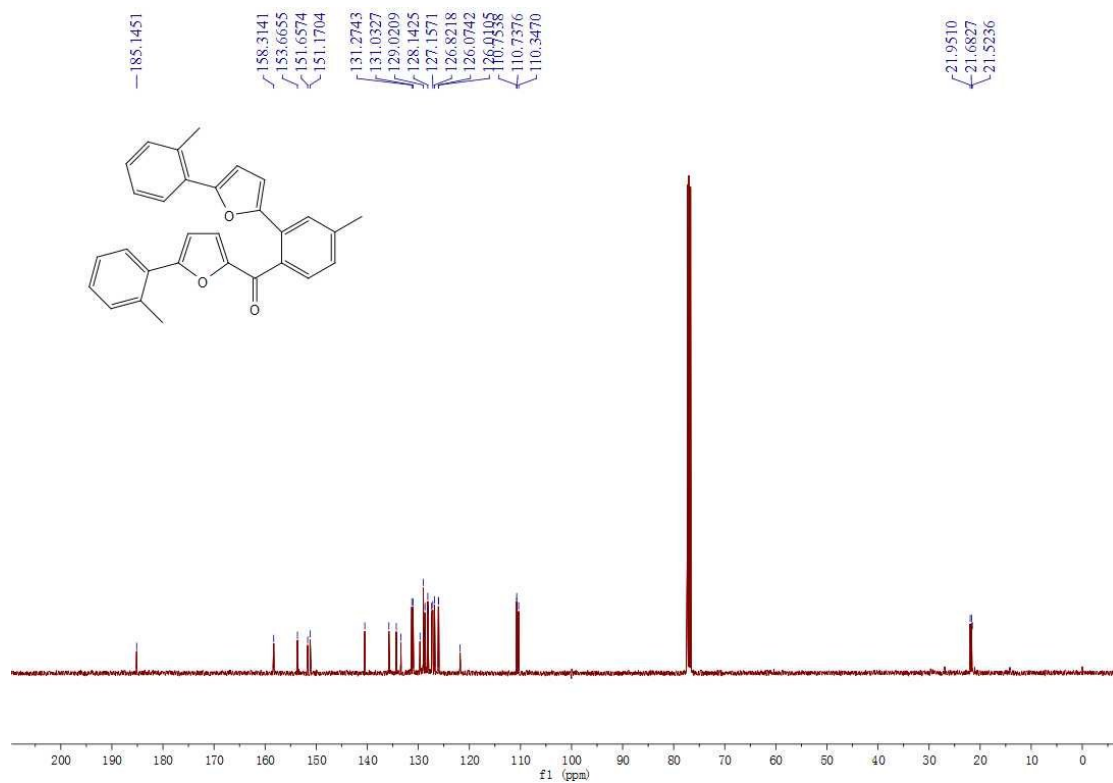

**<sup>1</sup>H NMR and <sup>13</sup>C NMR of 4p**

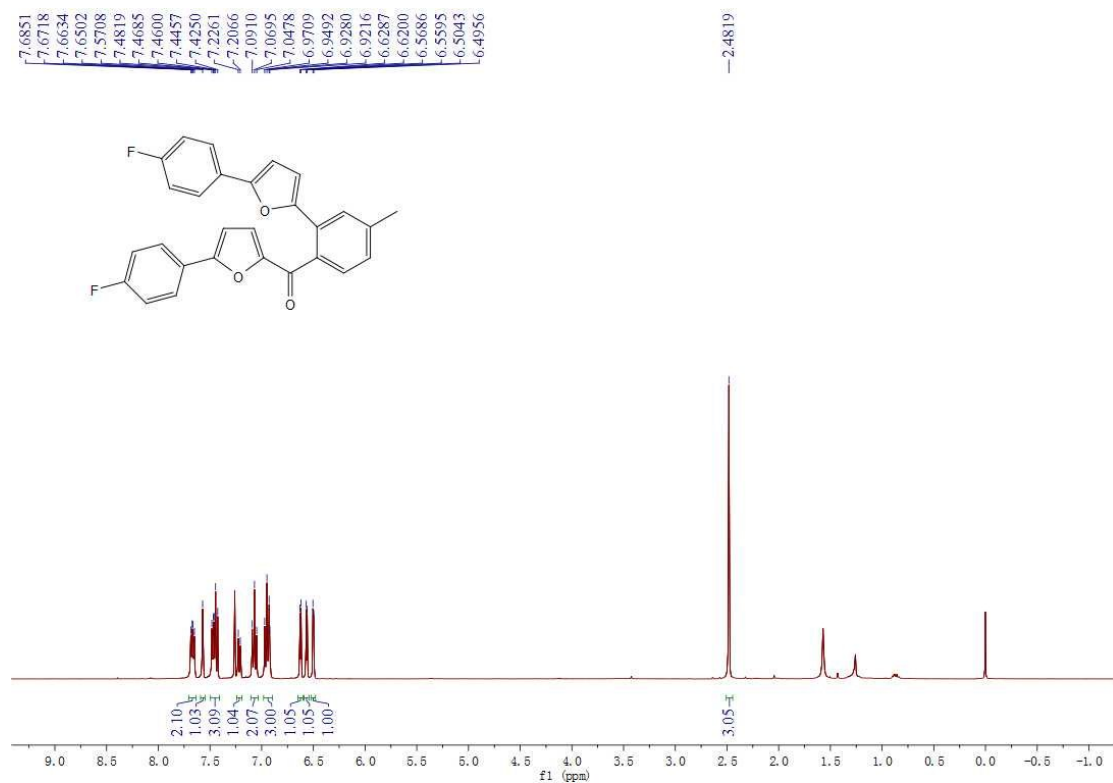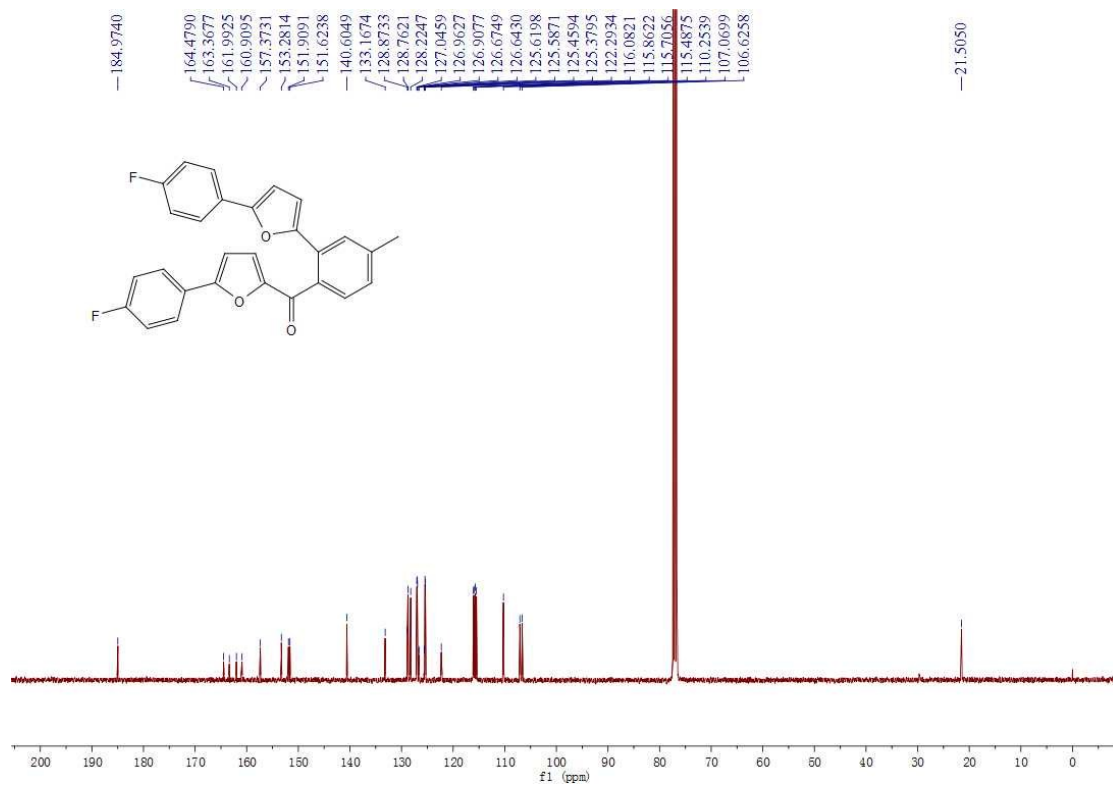

**<sup>1</sup>H NMR and <sup>13</sup>C NMR of 3a**

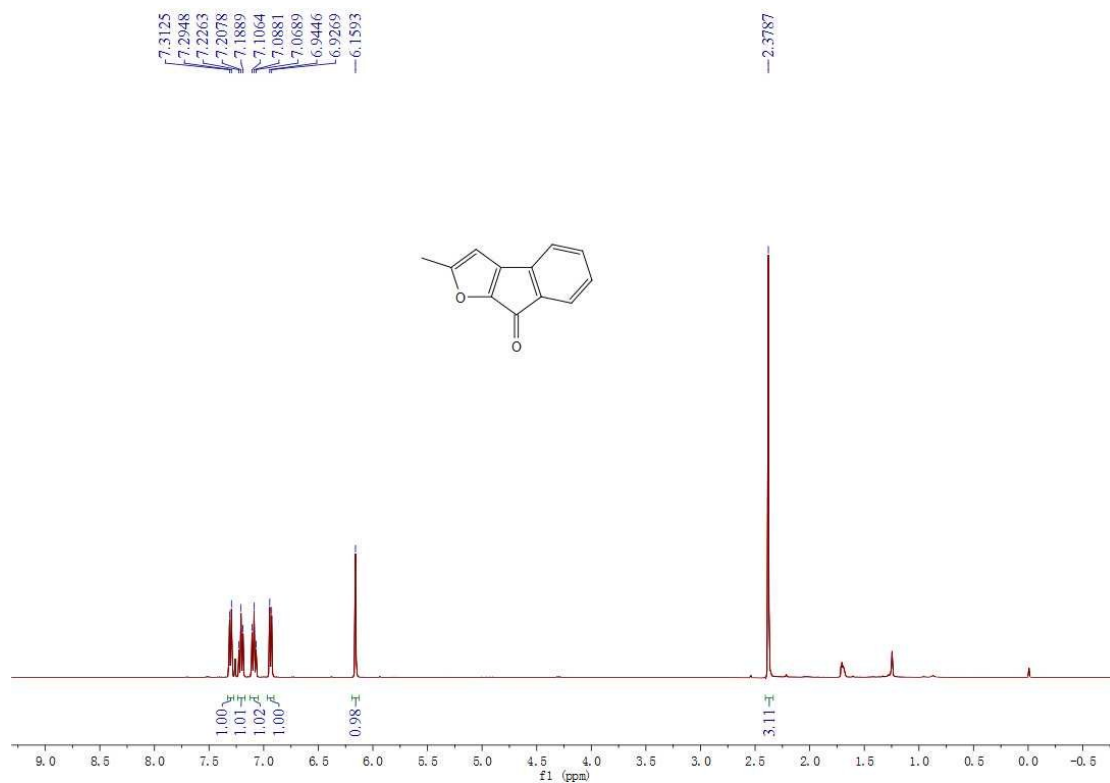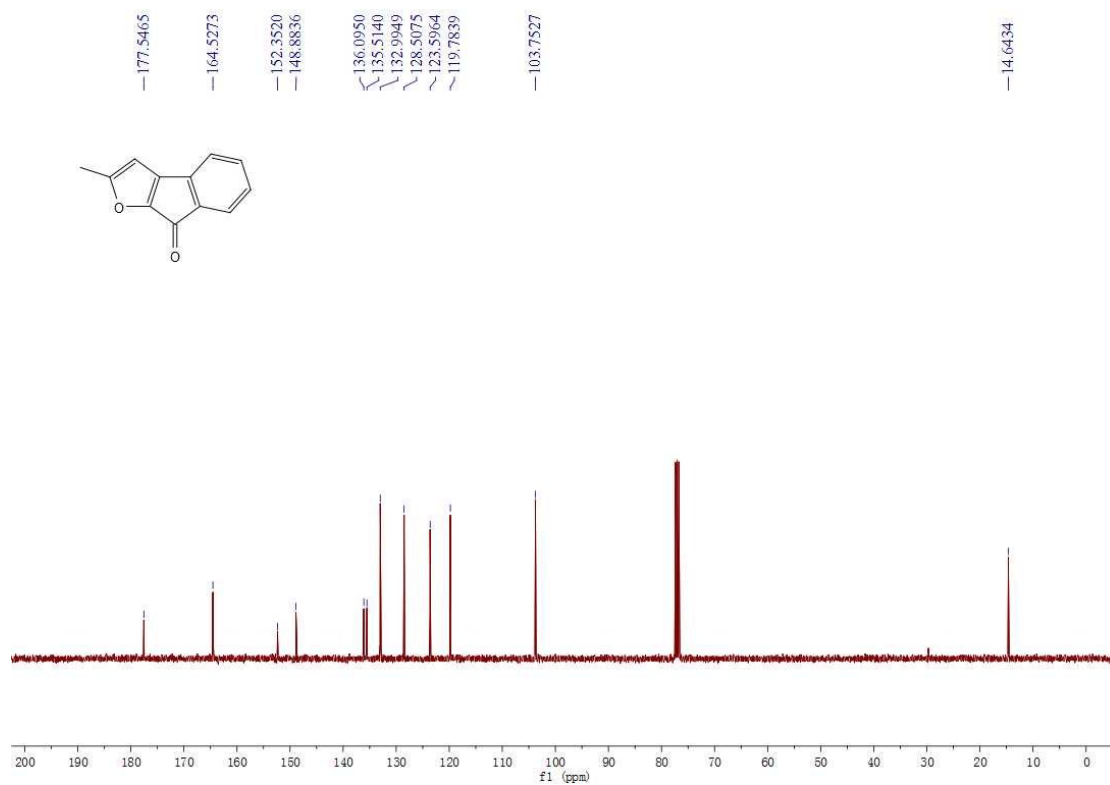

**<sup>1</sup>H NMR and <sup>13</sup>C NMR of 3b**

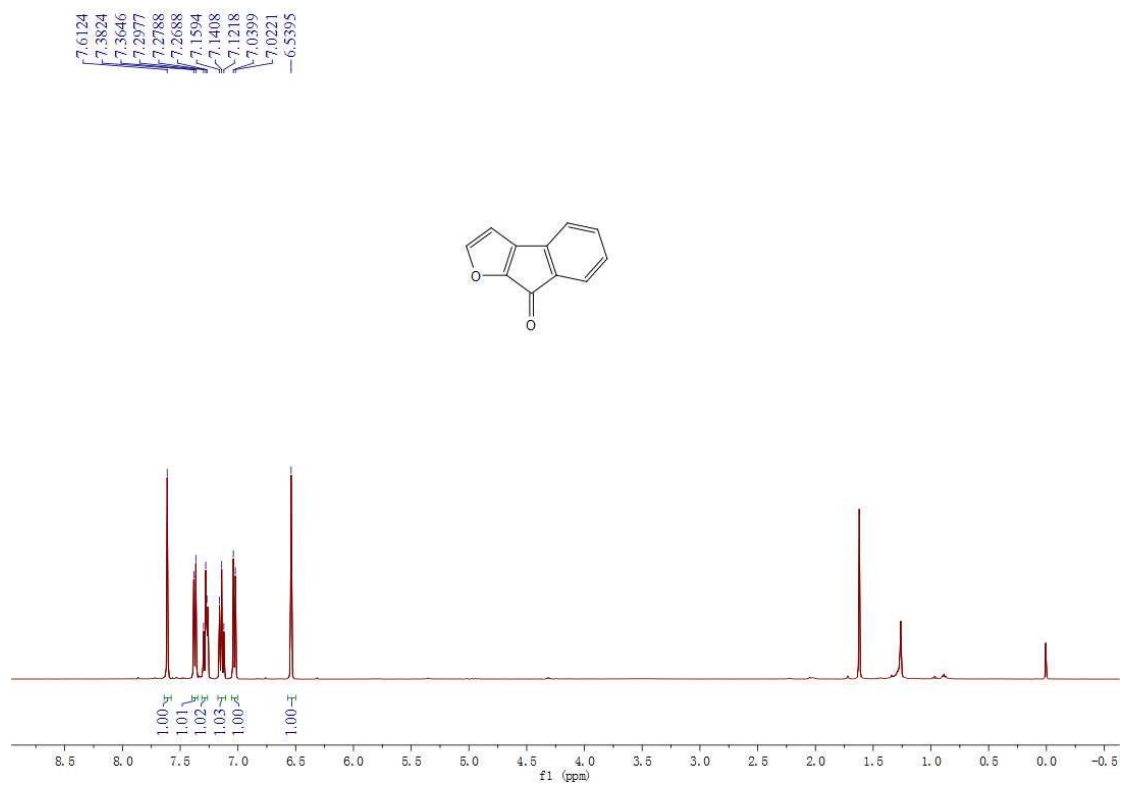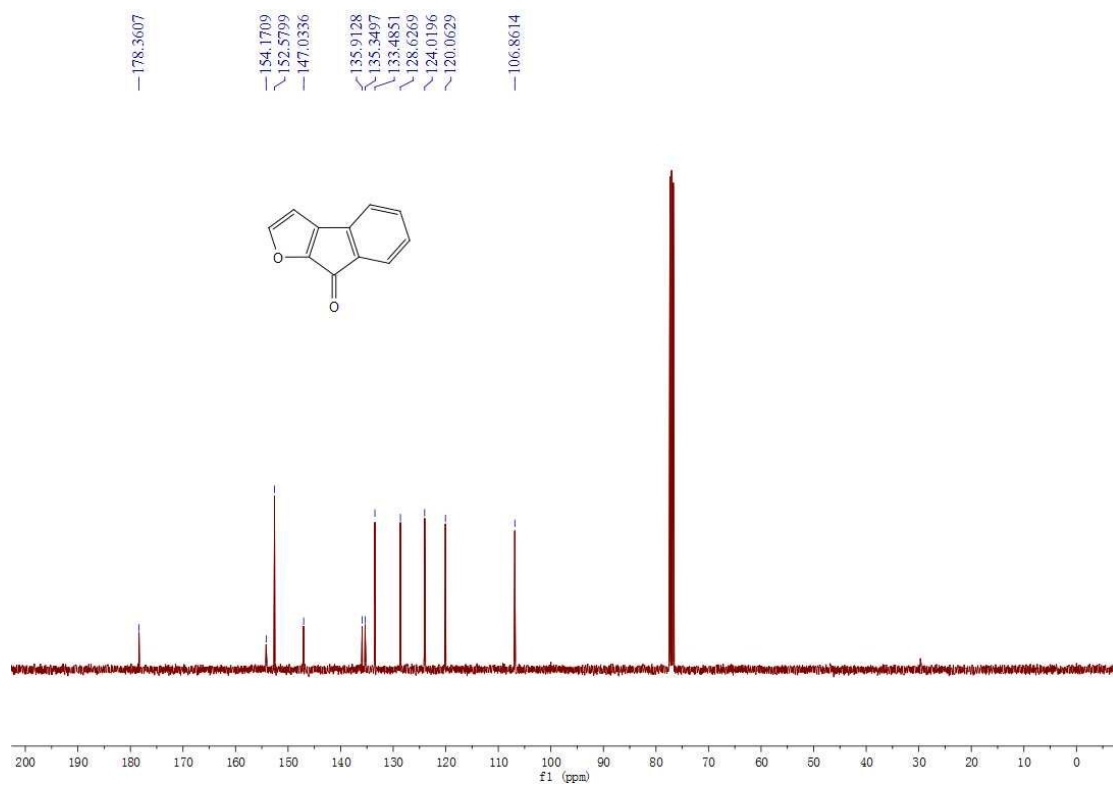

**<sup>1</sup>H NMR and <sup>13</sup>C NMR of 3c**

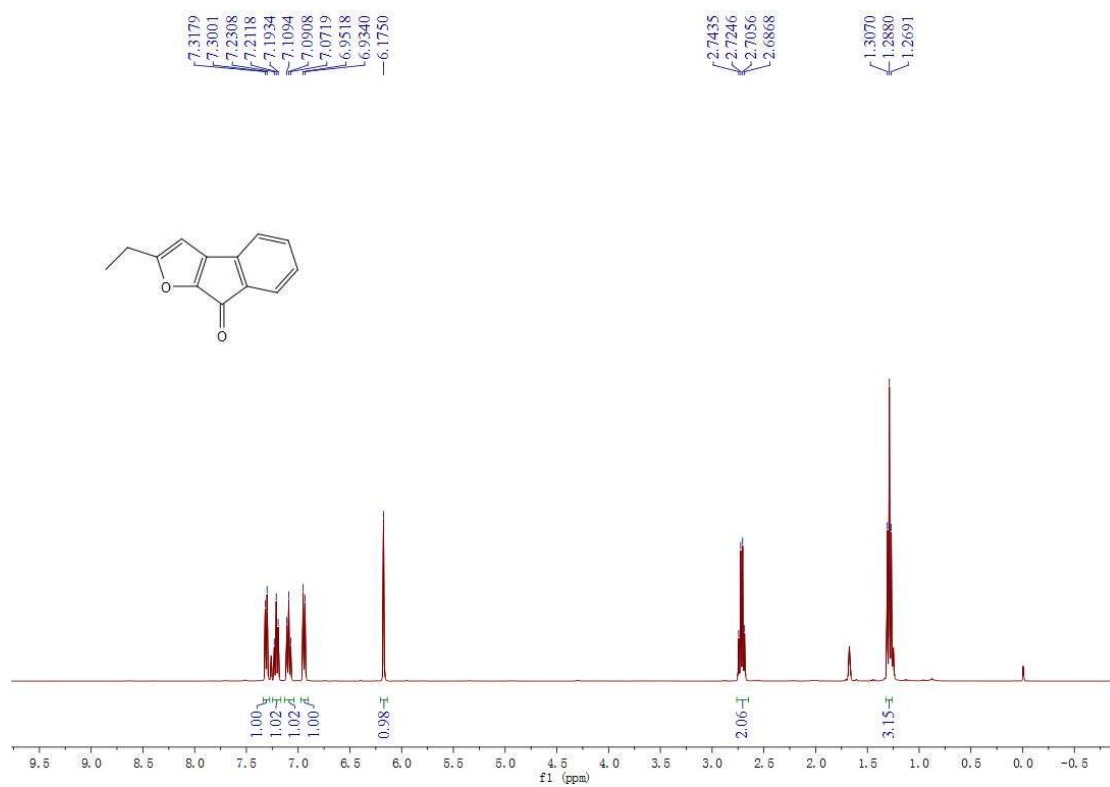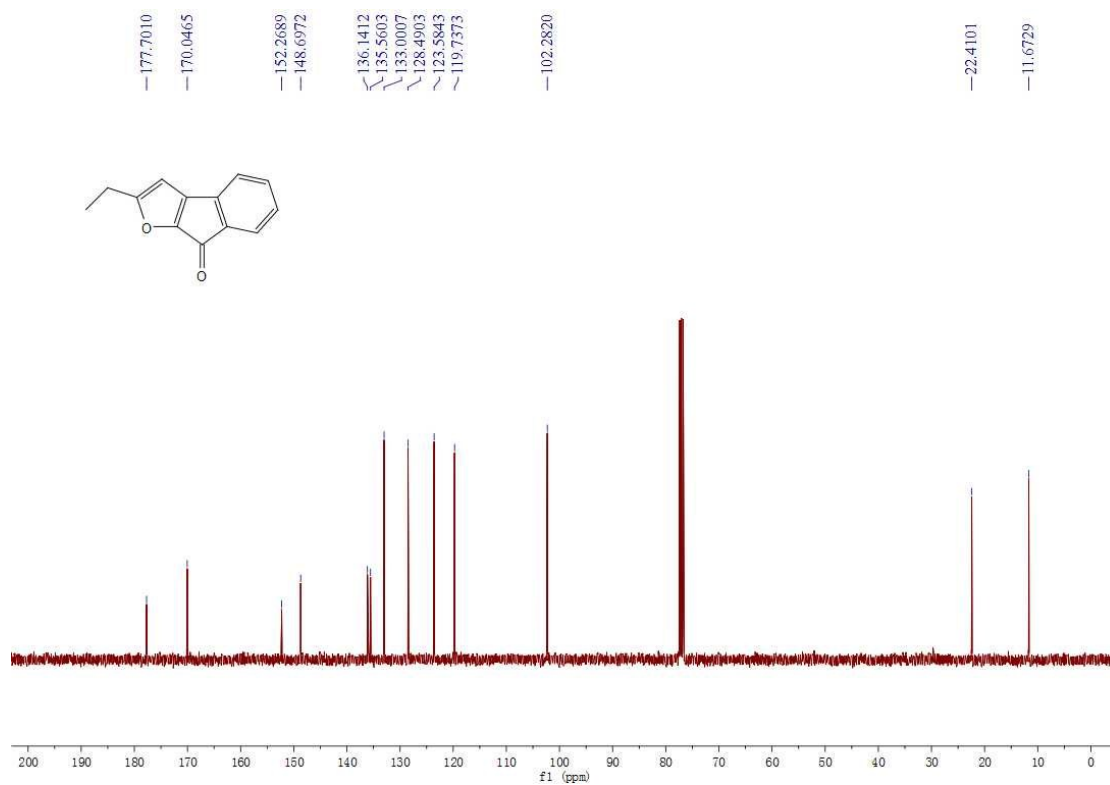

**<sup>1</sup>H NMR and <sup>13</sup>C NMR of 3d**



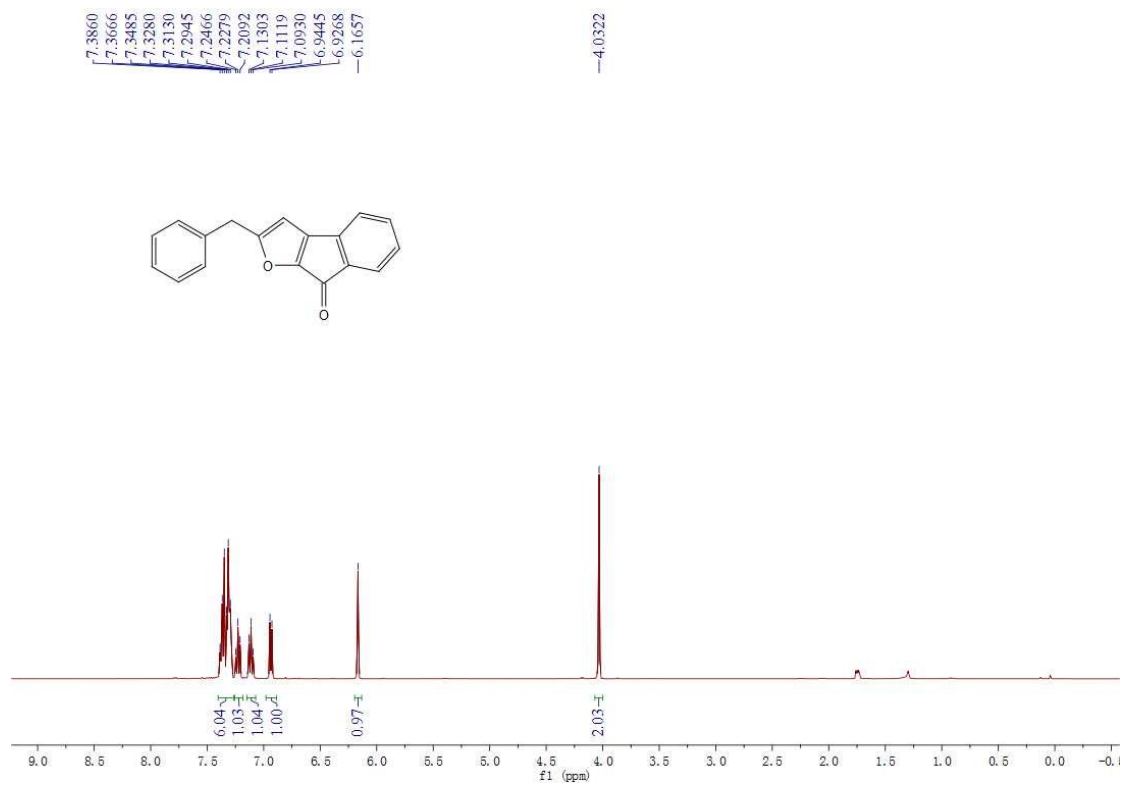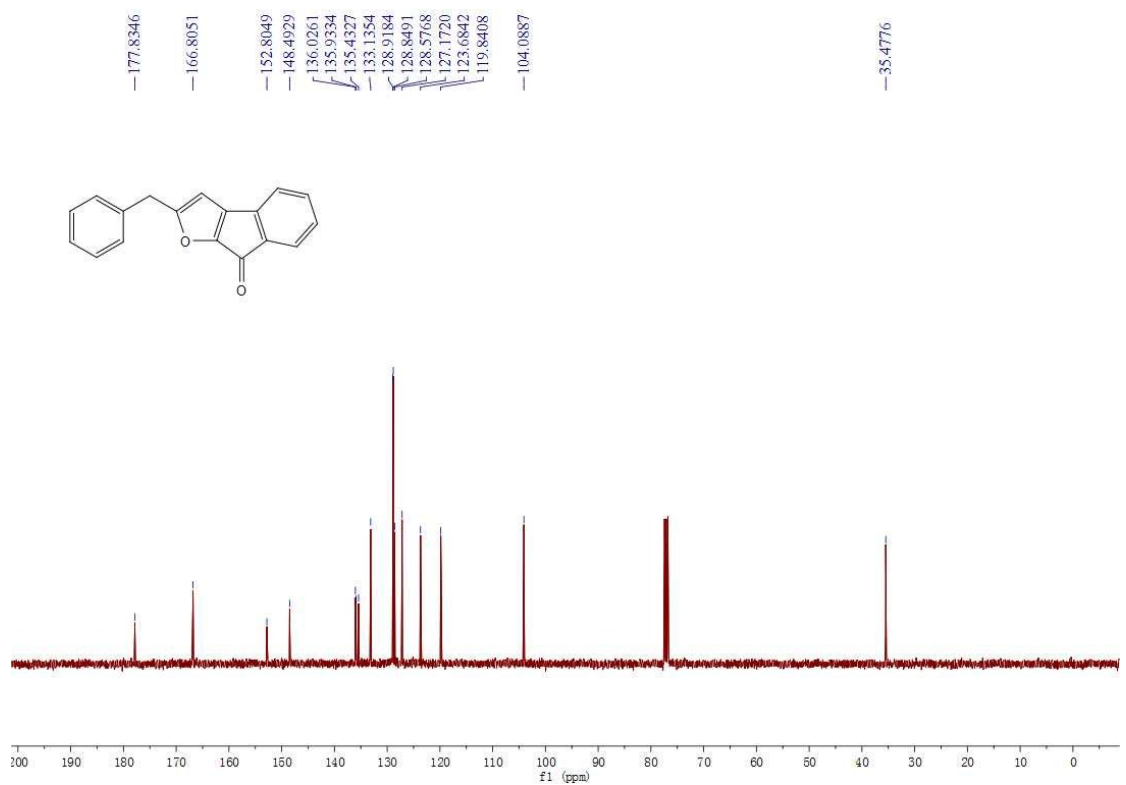

**<sup>1</sup>H NMR and <sup>13</sup>C NMR of 3e**

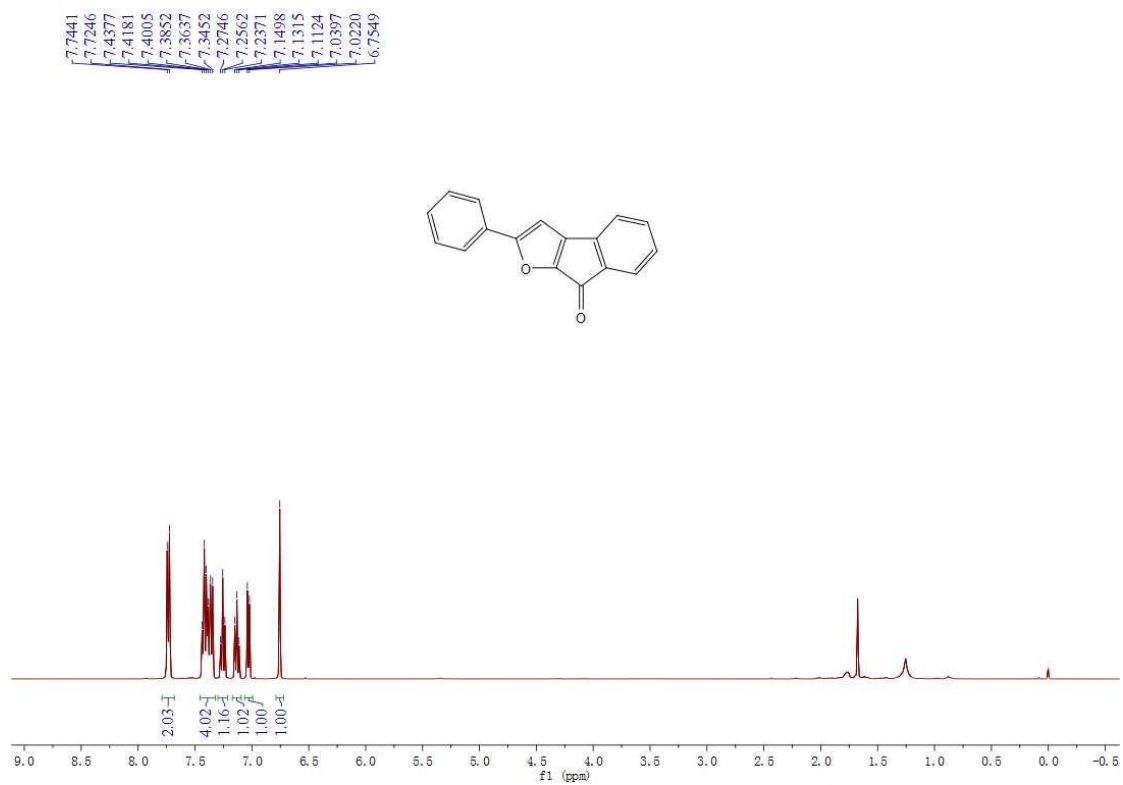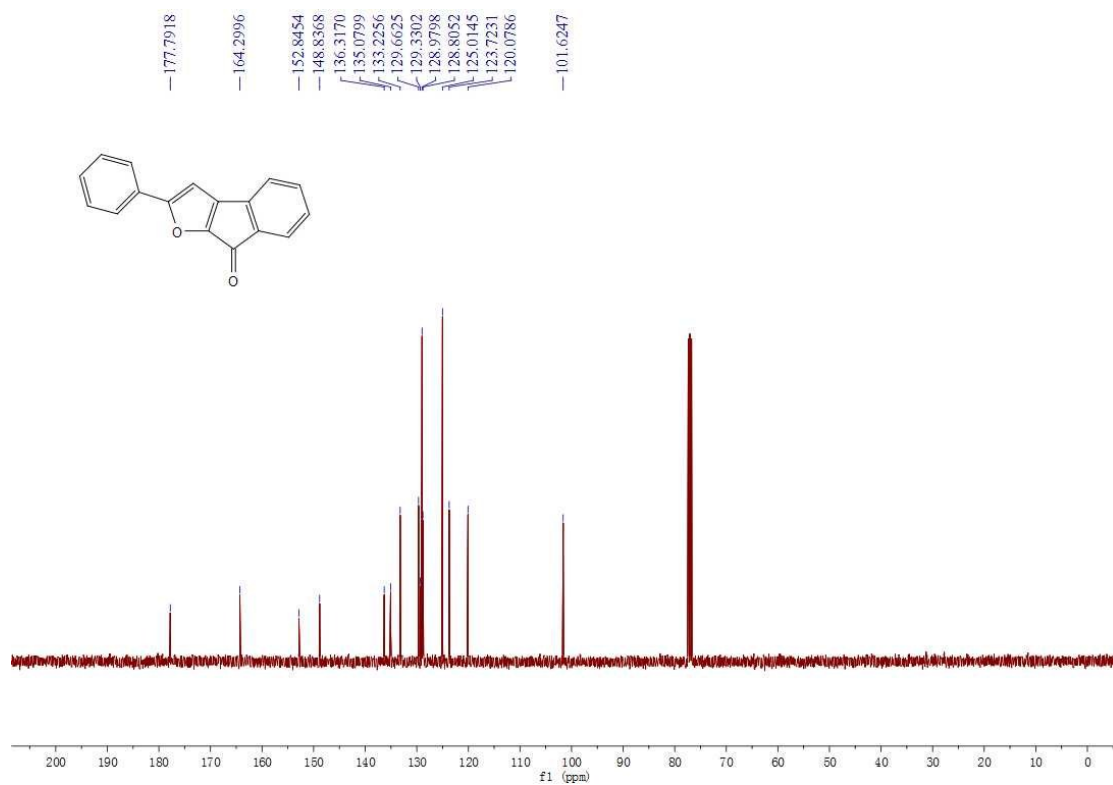

**<sup>1</sup>H NMR and <sup>13</sup>C NMR of 3f**

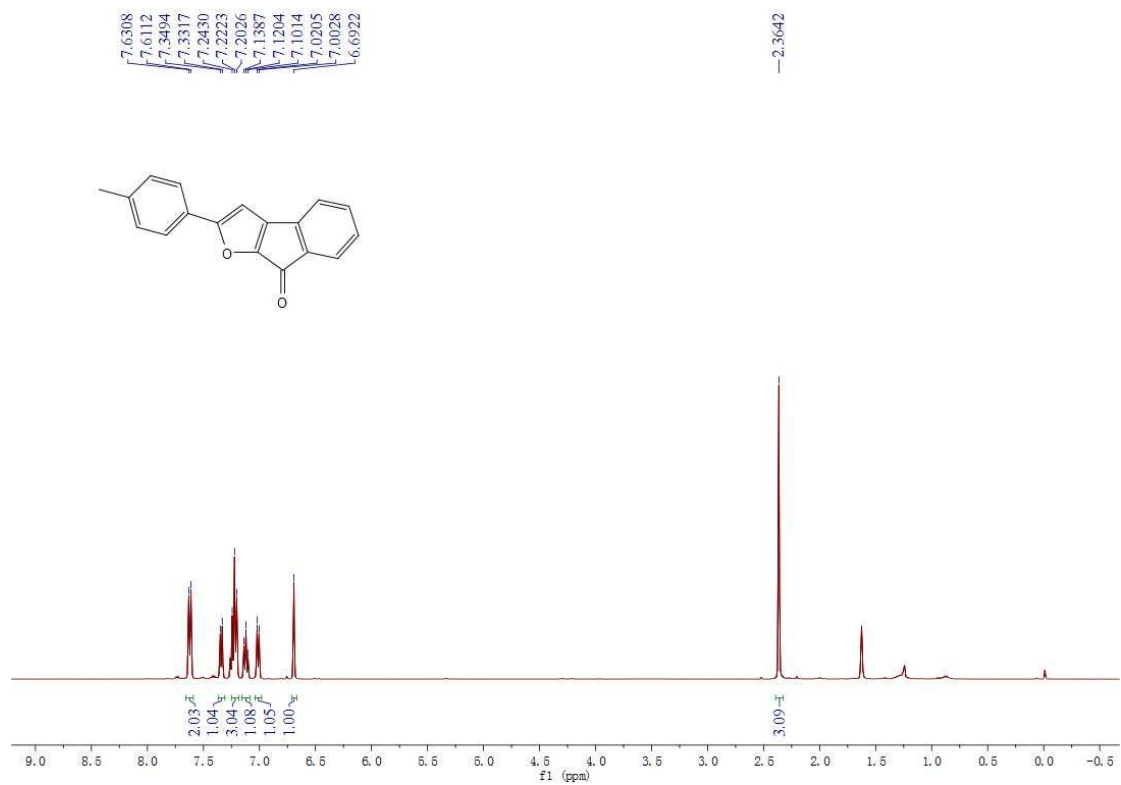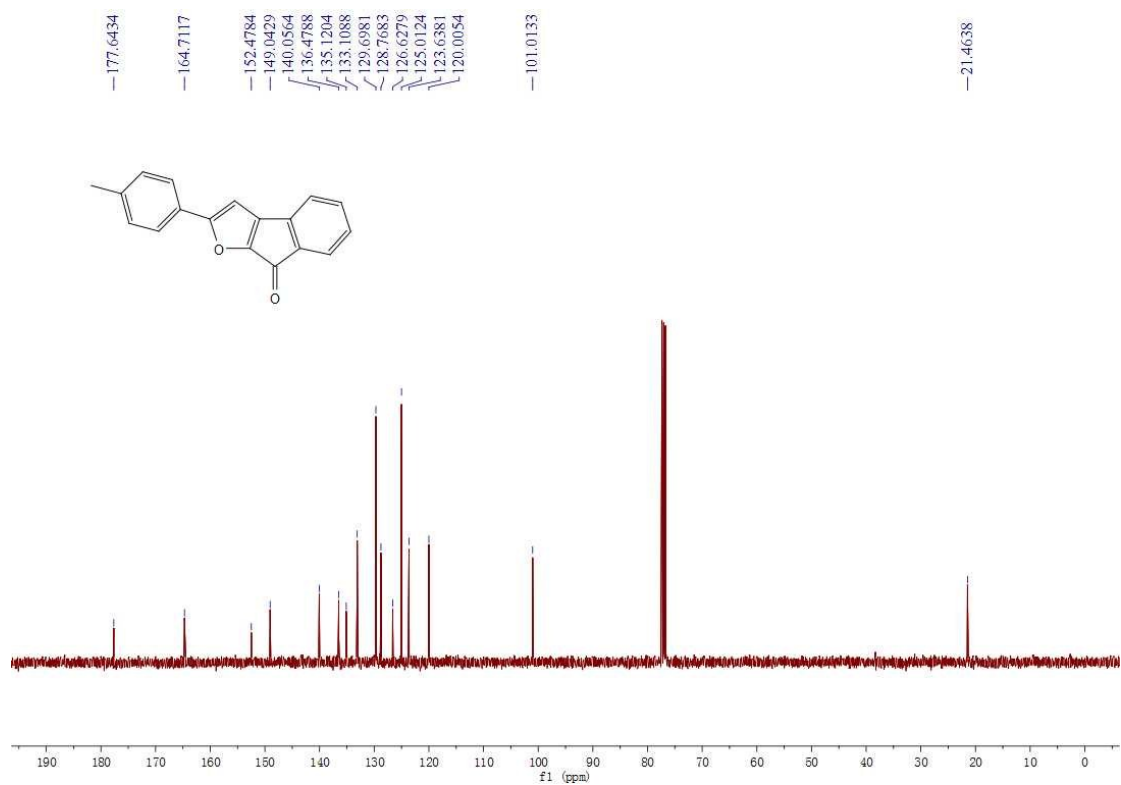

**<sup>1</sup>H NMR and <sup>13</sup>C NMR of 3g**

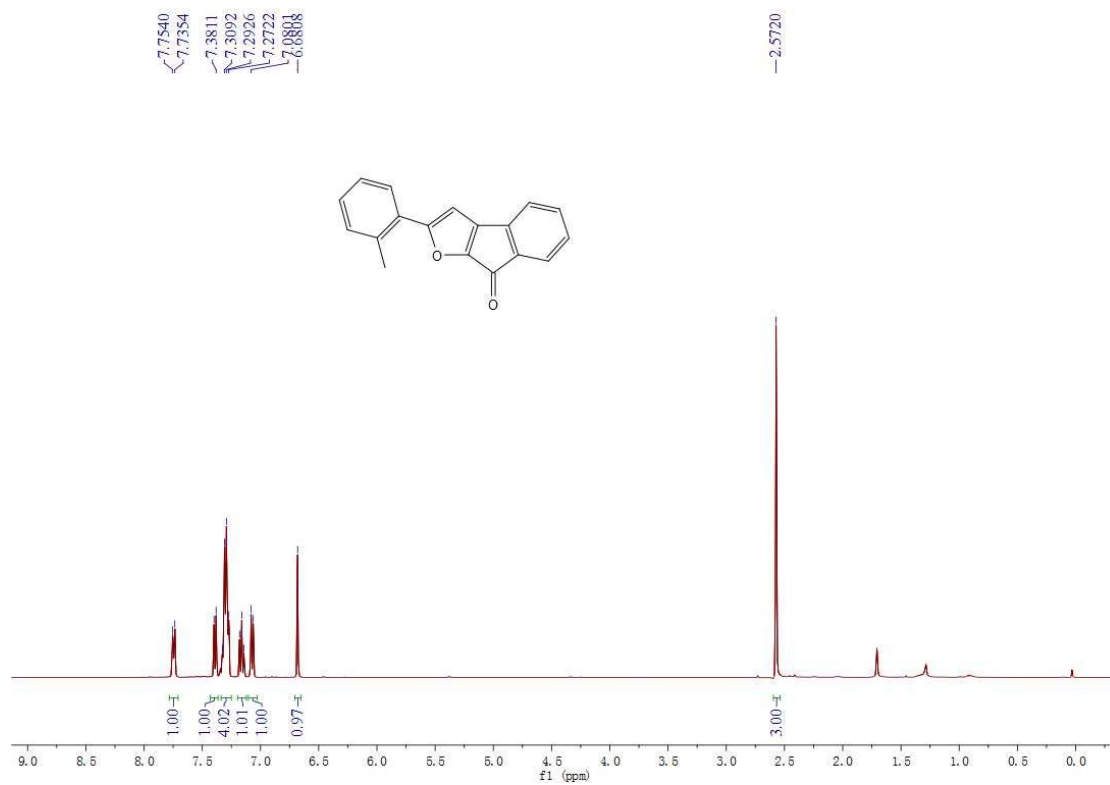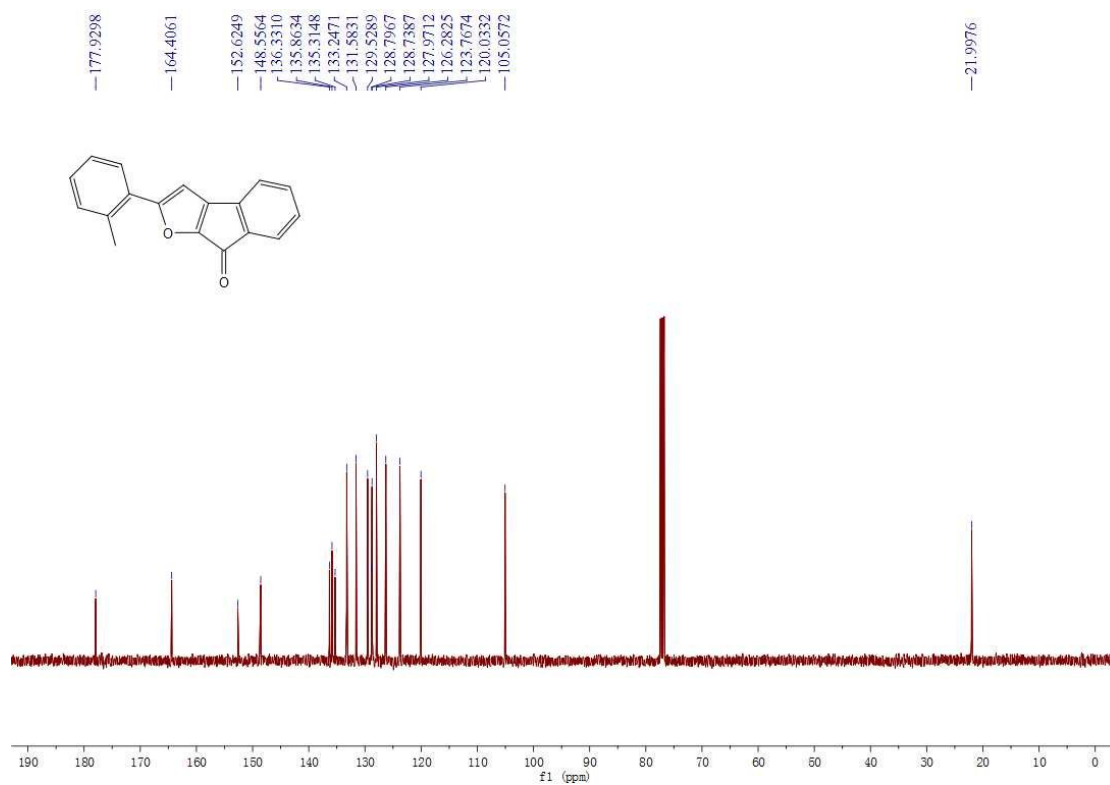

**<sup>1</sup>H NMR and <sup>13</sup>C NMR of 3h**

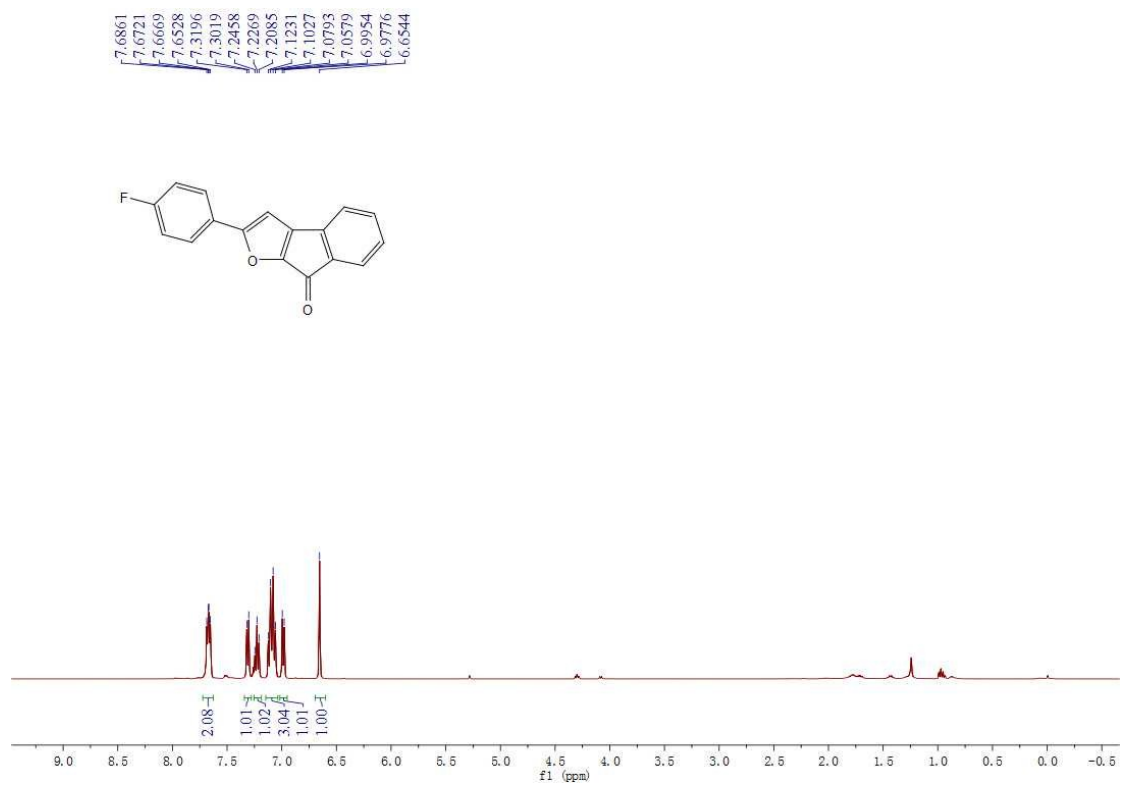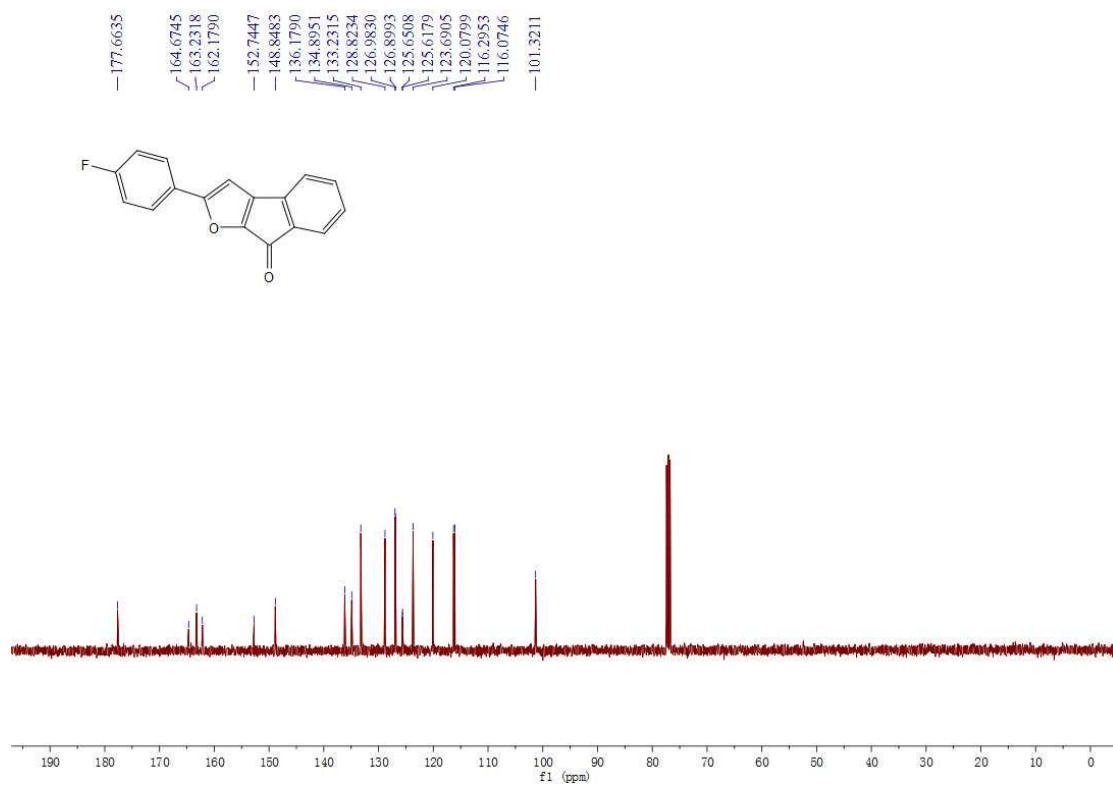

**<sup>1</sup>H NMR and <sup>13</sup>C NMR of 3i**

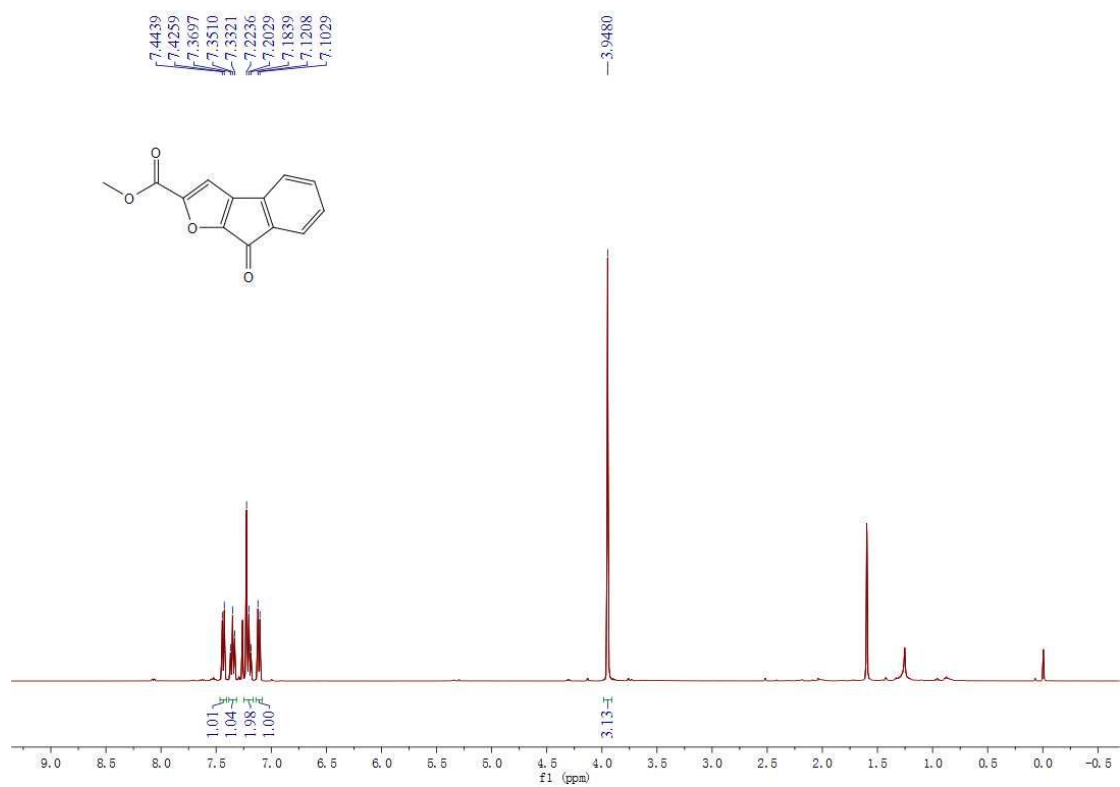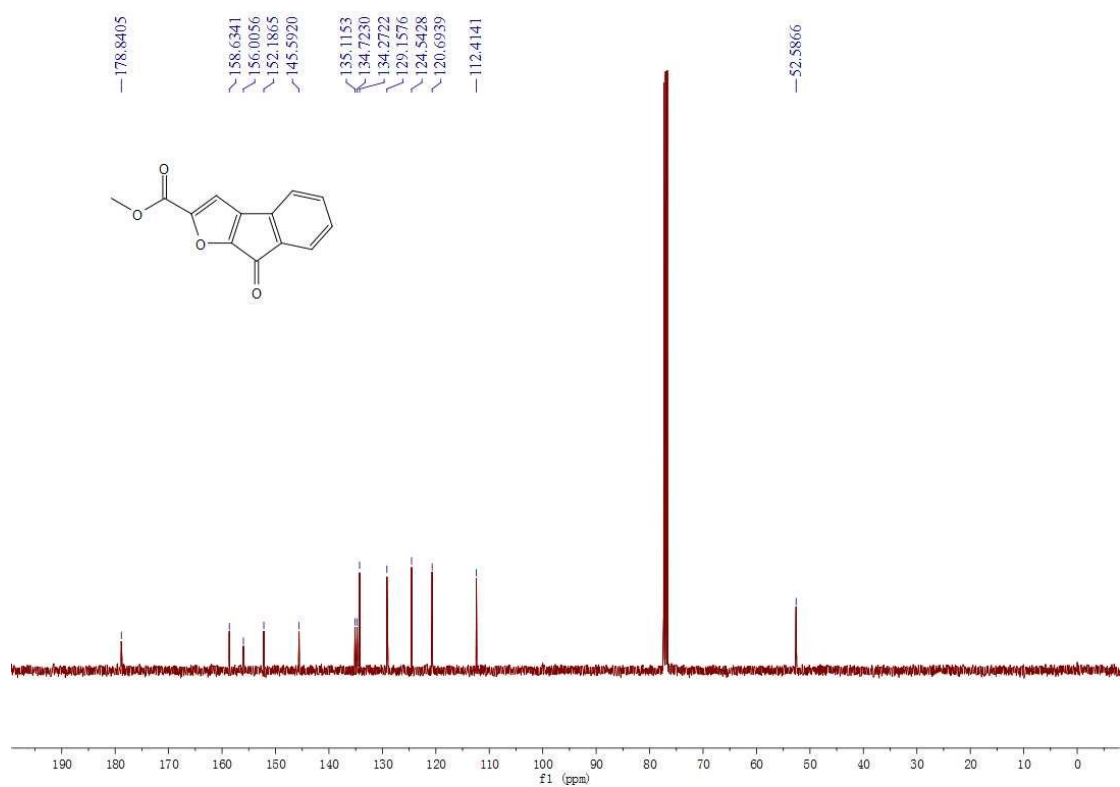

$^1\text{H}$  NMR and  $^{13}\text{C}$  NMR of 3j

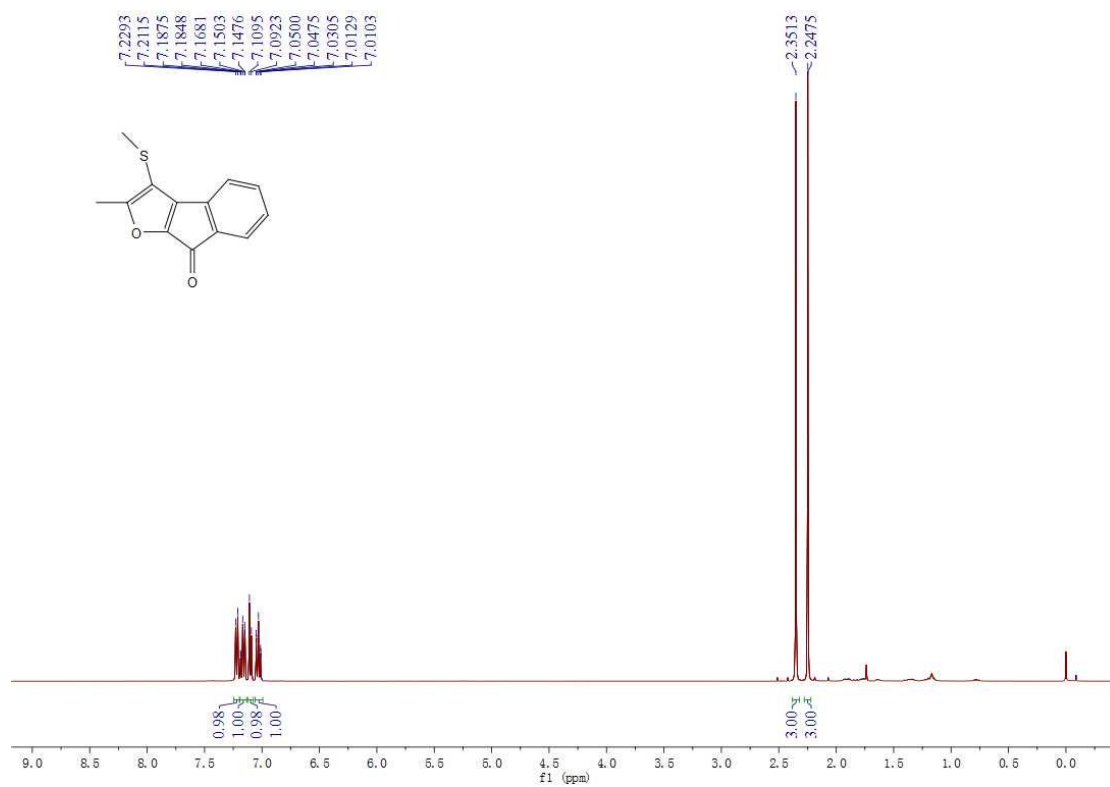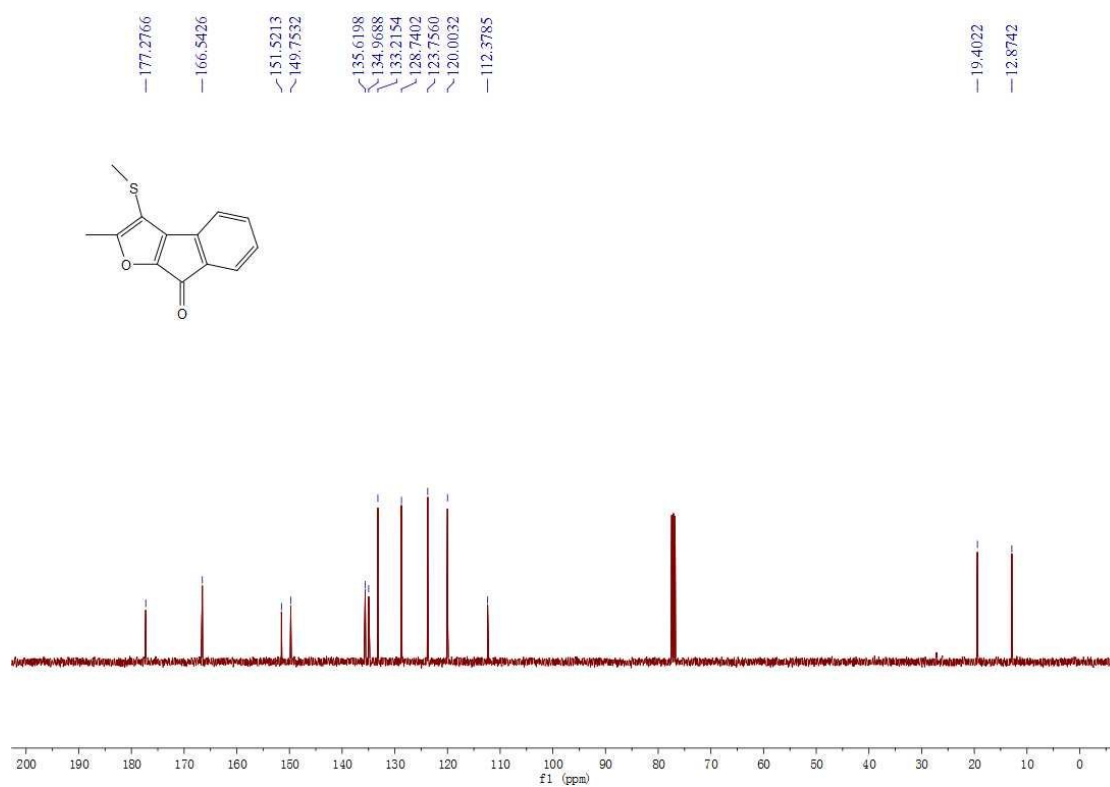

**<sup>1</sup>H NMR and <sup>13</sup>C NMR of 3k**

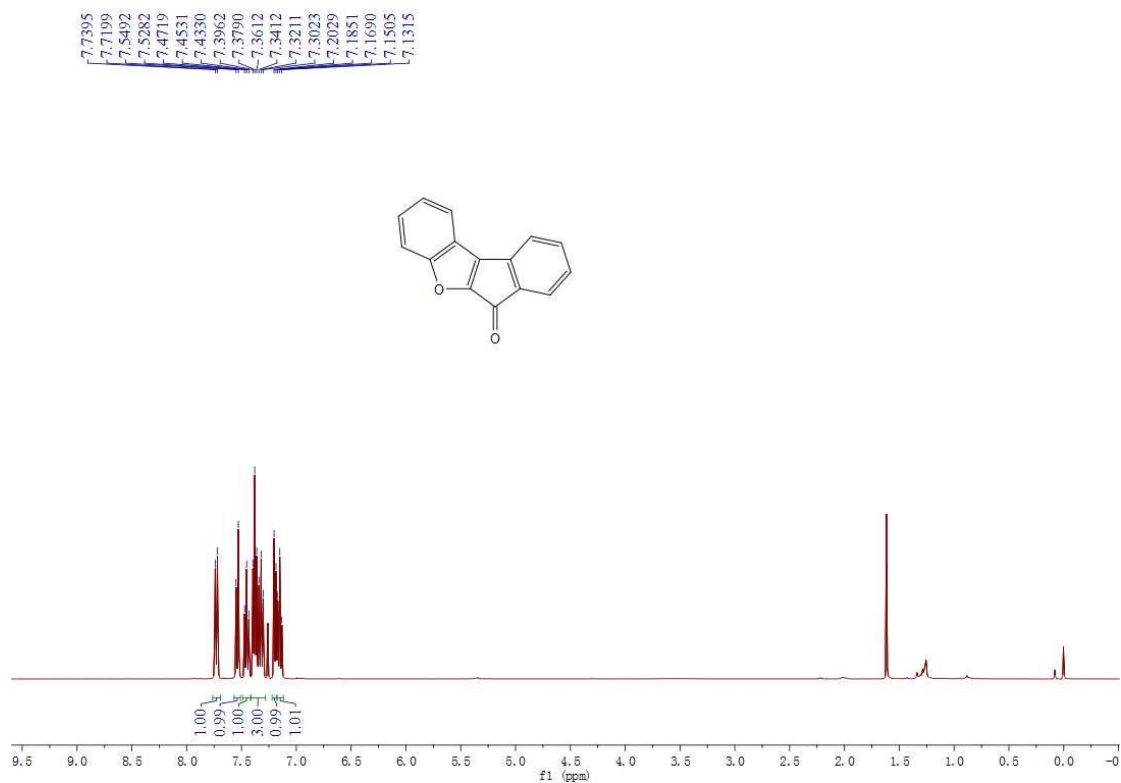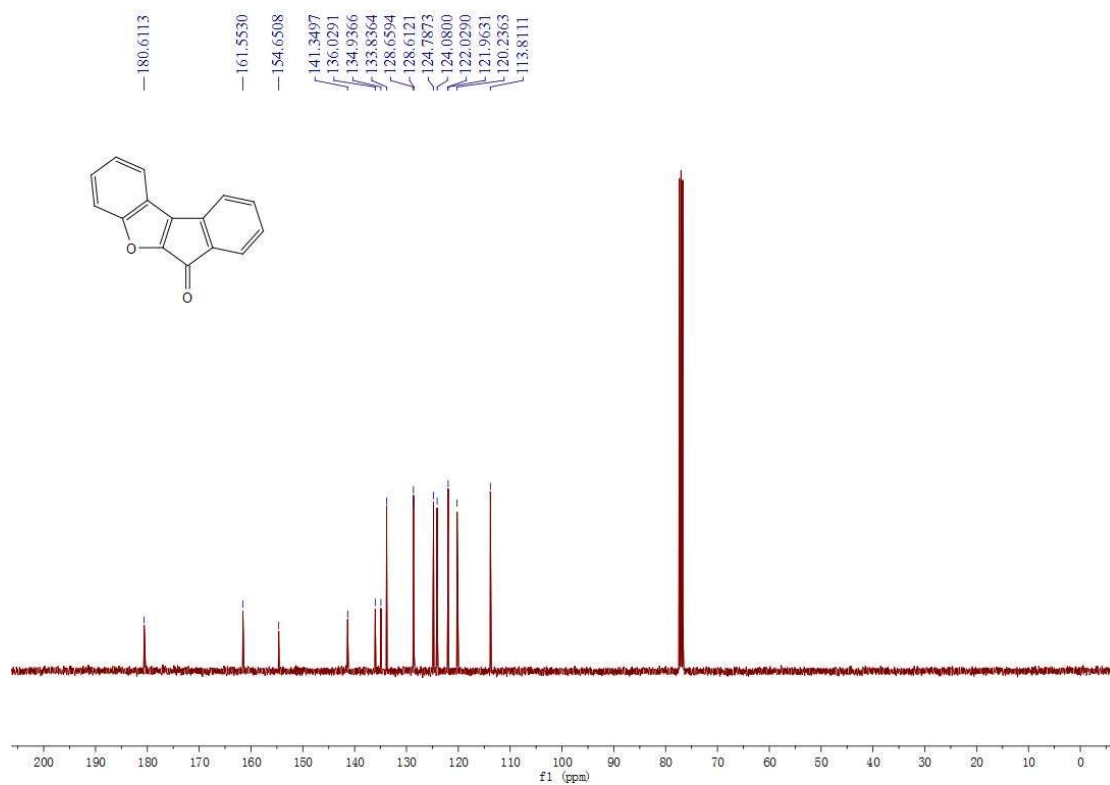

**<sup>1</sup>H NMR and <sup>13</sup>C NMR of 31**



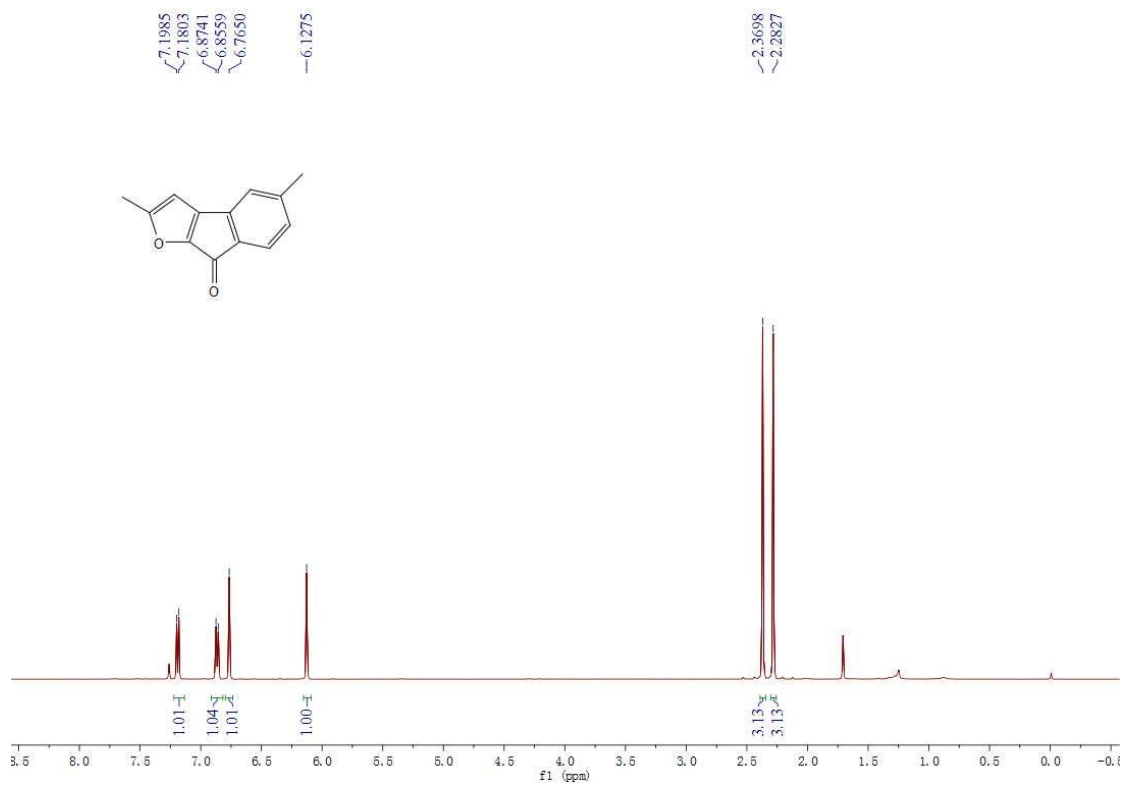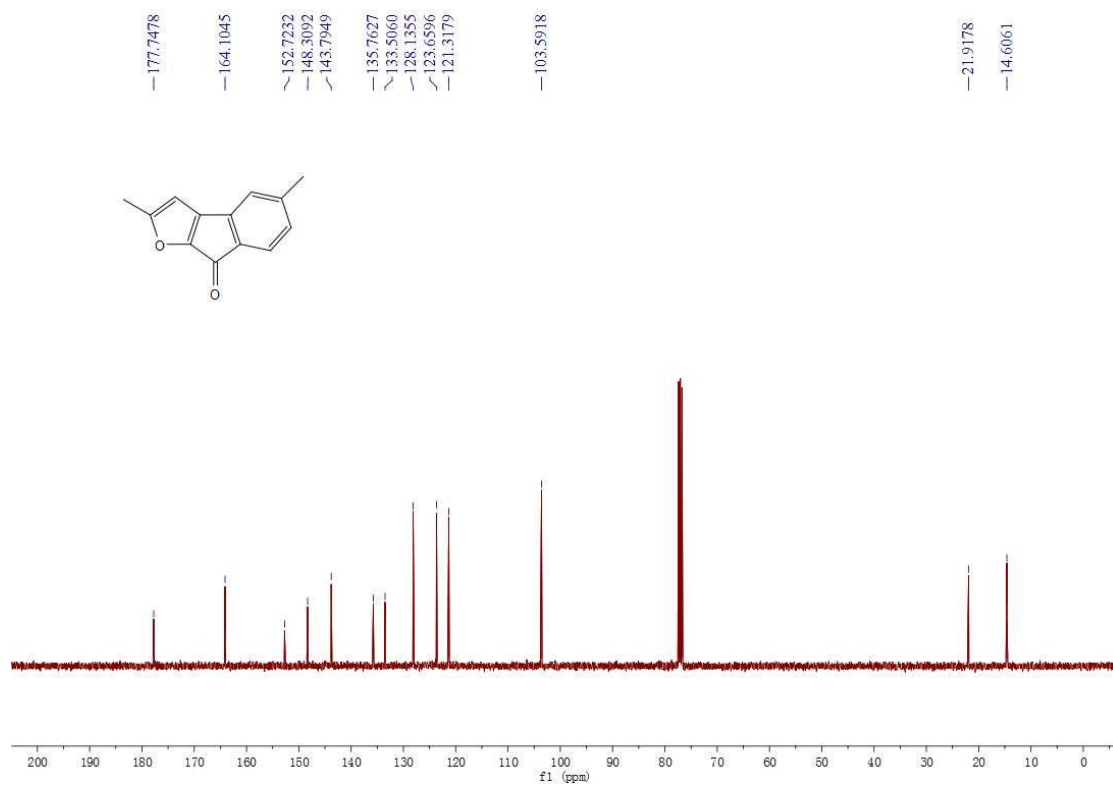

**$^1\text{H}$  NMR and  $^{13}\text{C}$  NMR of 3m**

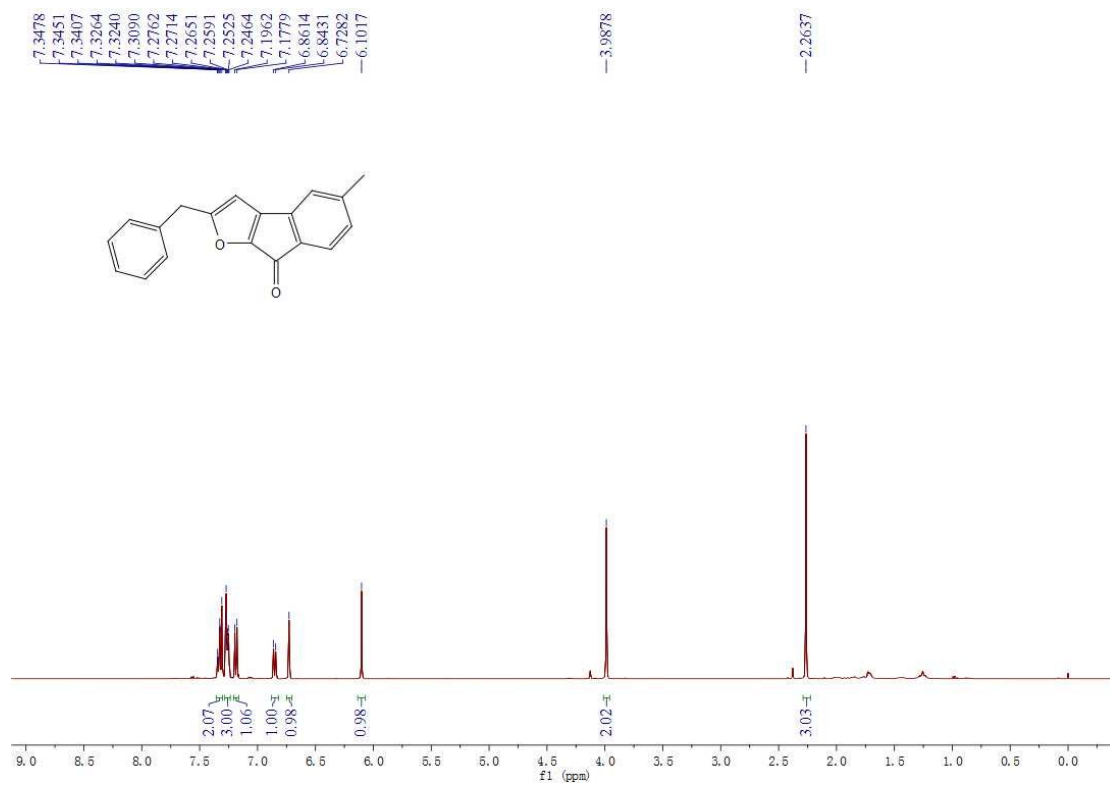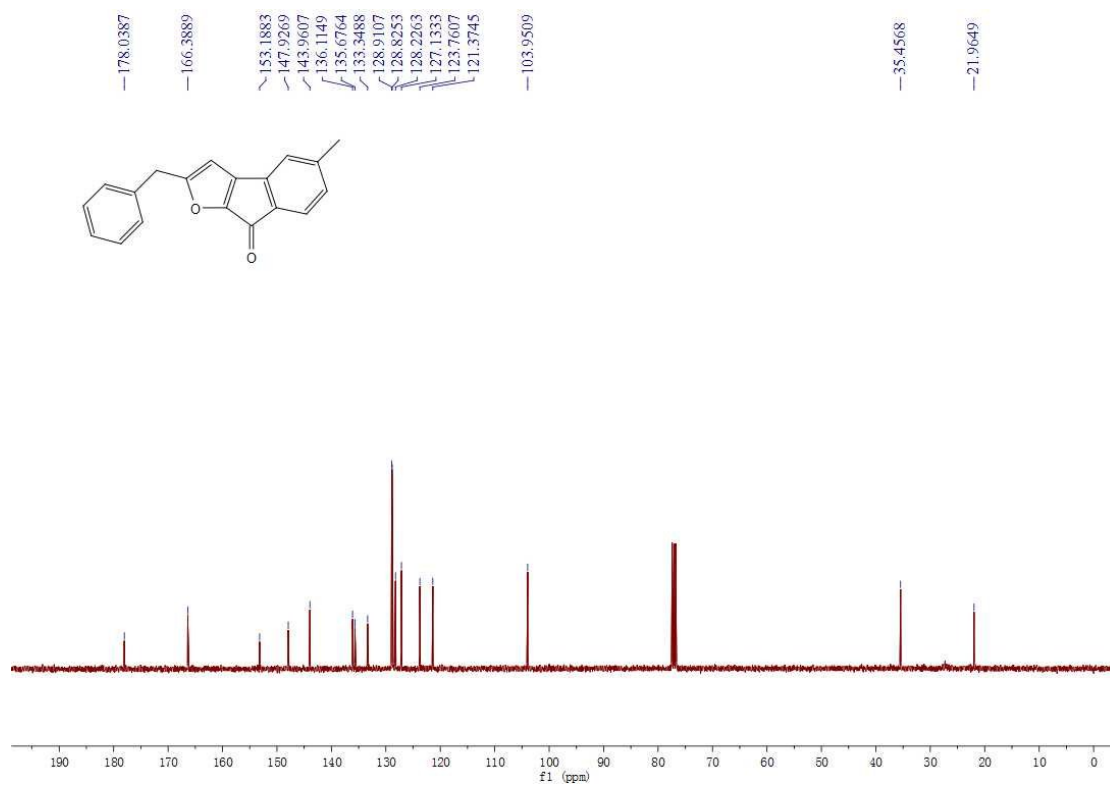

**<sup>1</sup>H NMR and <sup>13</sup>C NMR of 3n**

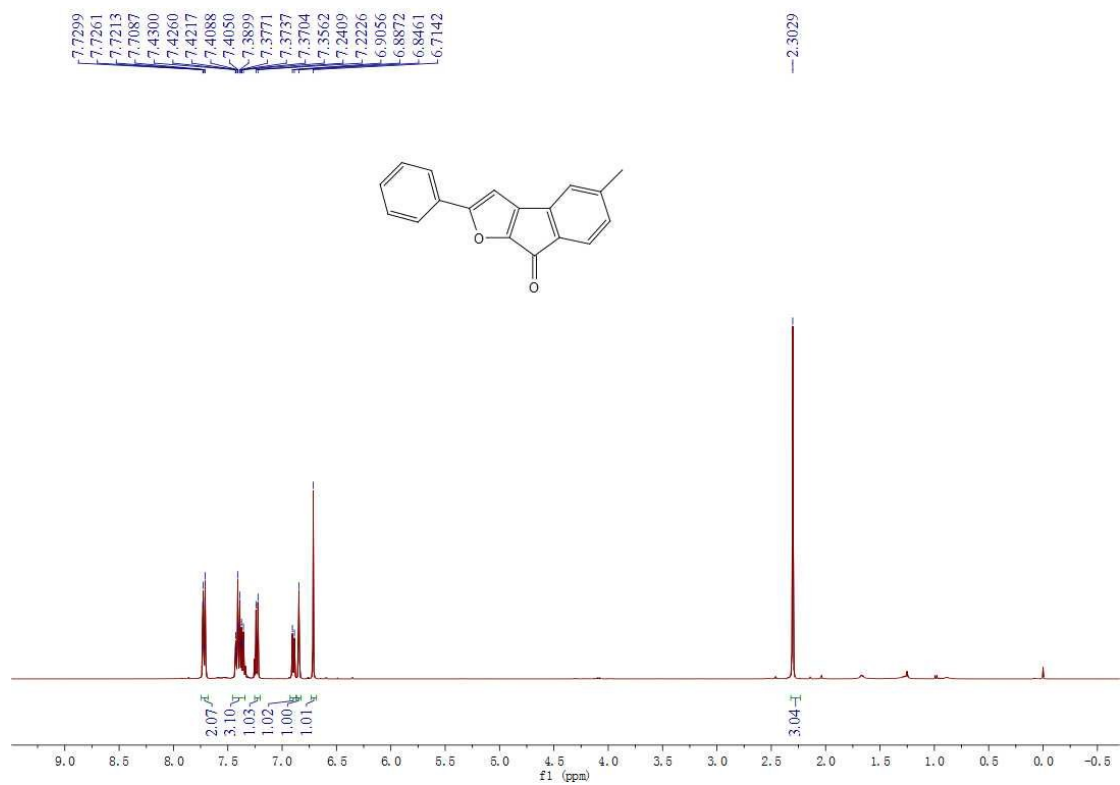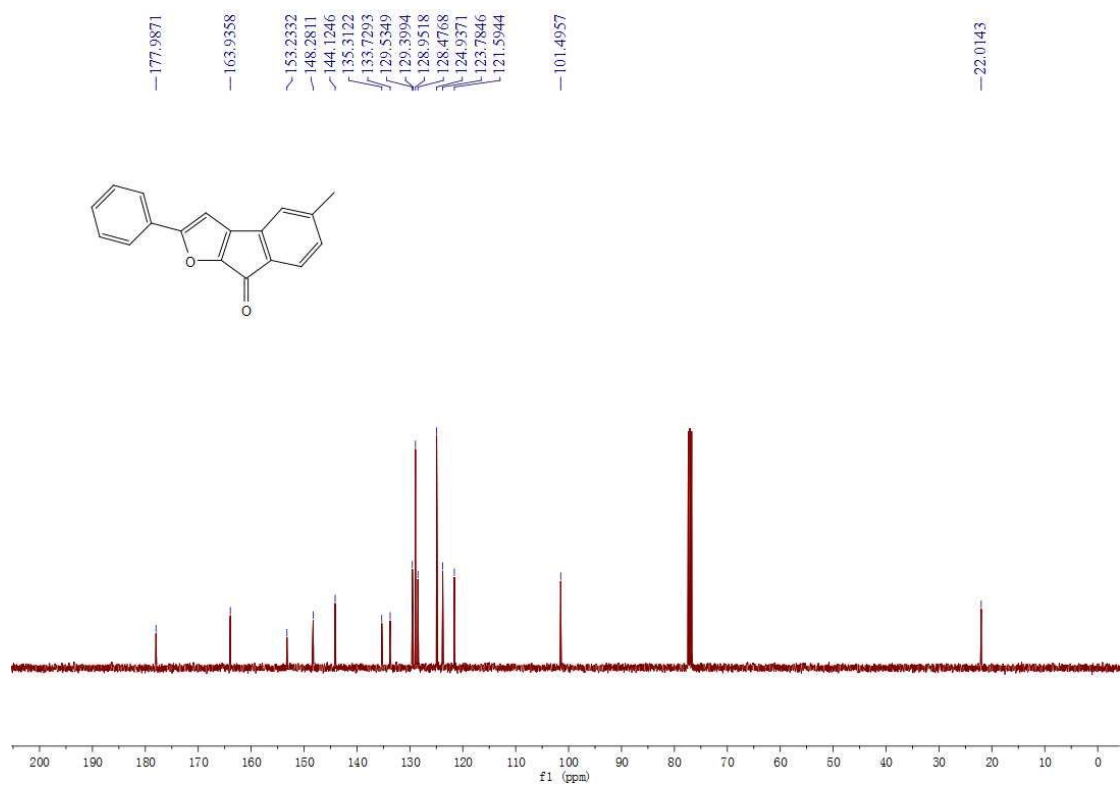

**<sup>1</sup>H NMR and <sup>13</sup>C NMR of 3o**

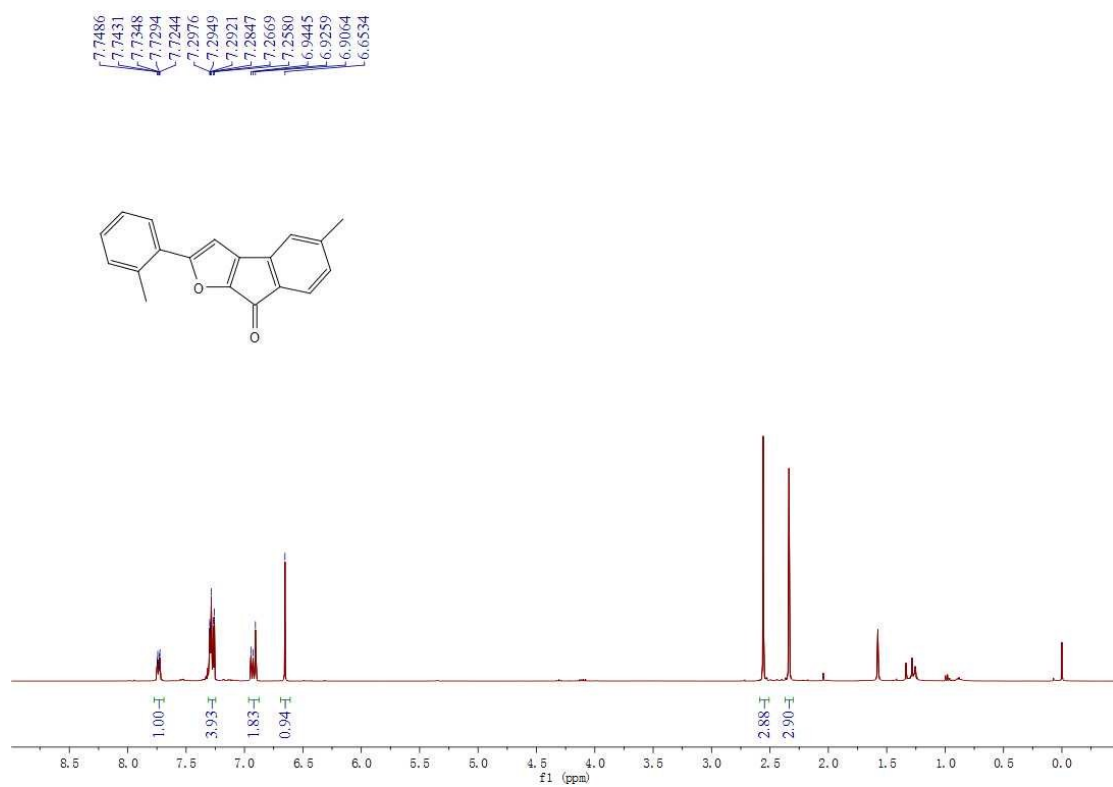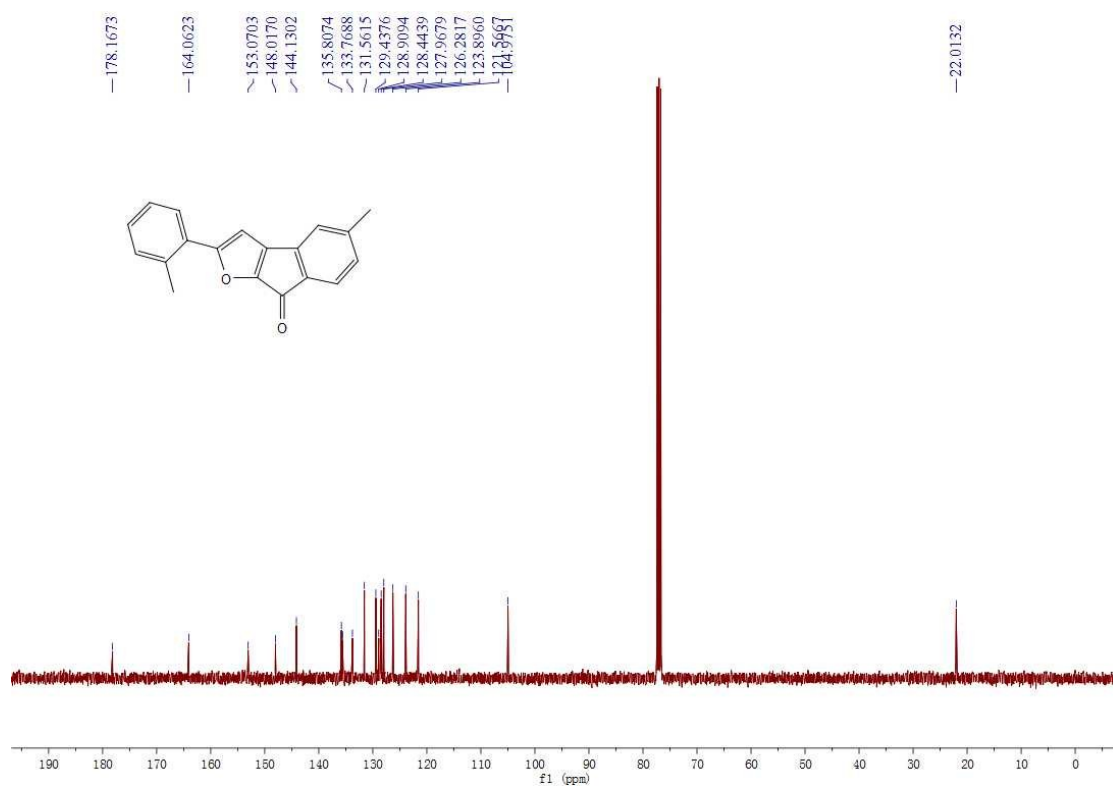

# <sup>1</sup>H NMR and <sup>13</sup>C NMR of 3p

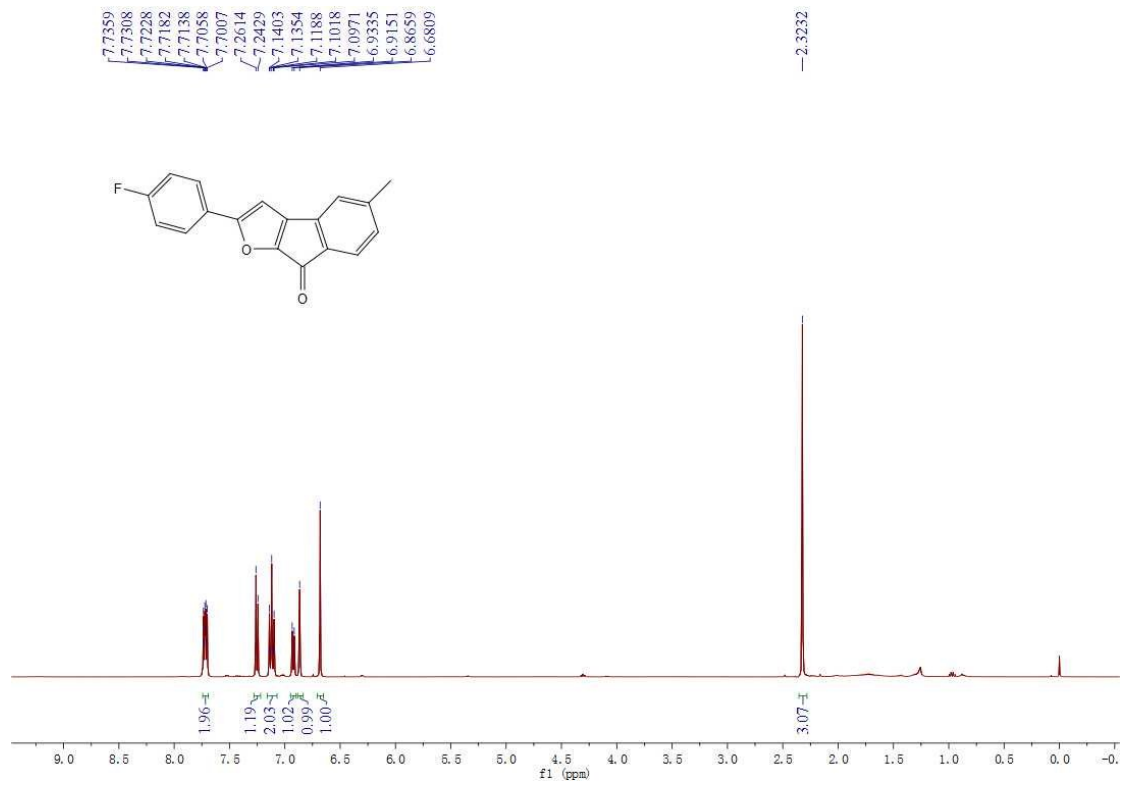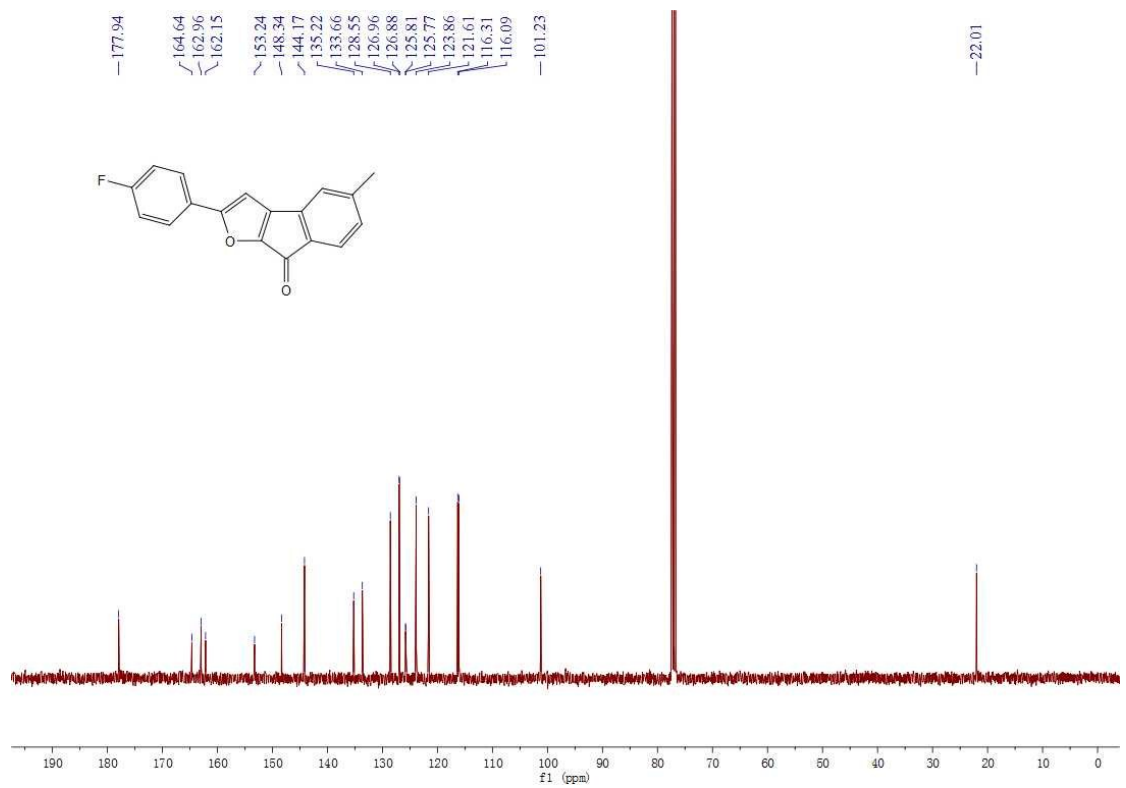

# <sup>1</sup>H NMR and <sup>13</sup>C NMR of 3r

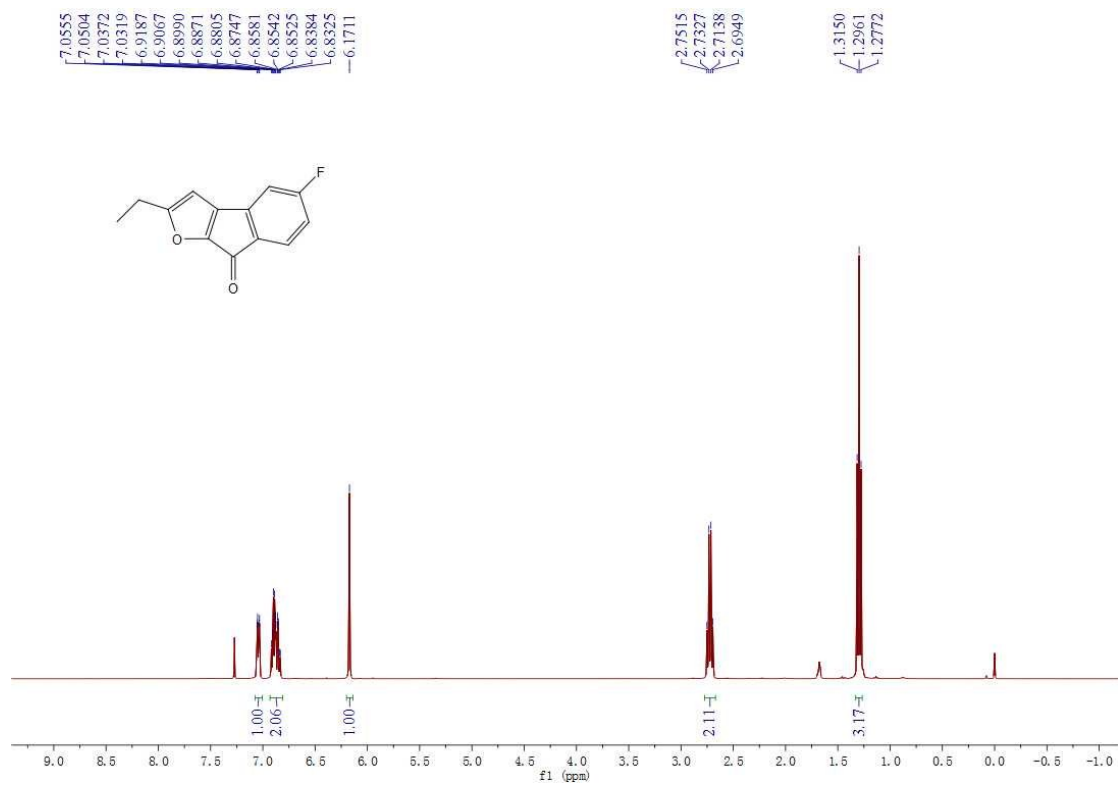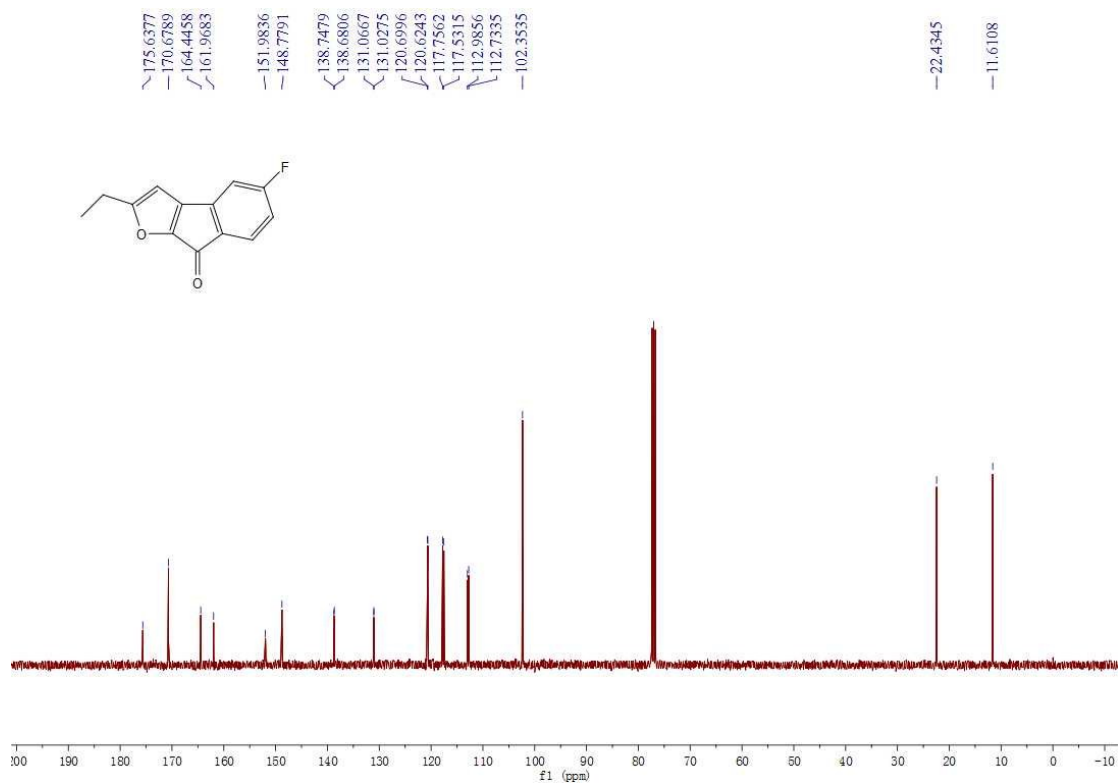

# <sup>1</sup>H NMR and <sup>13</sup>C NMR of 3s

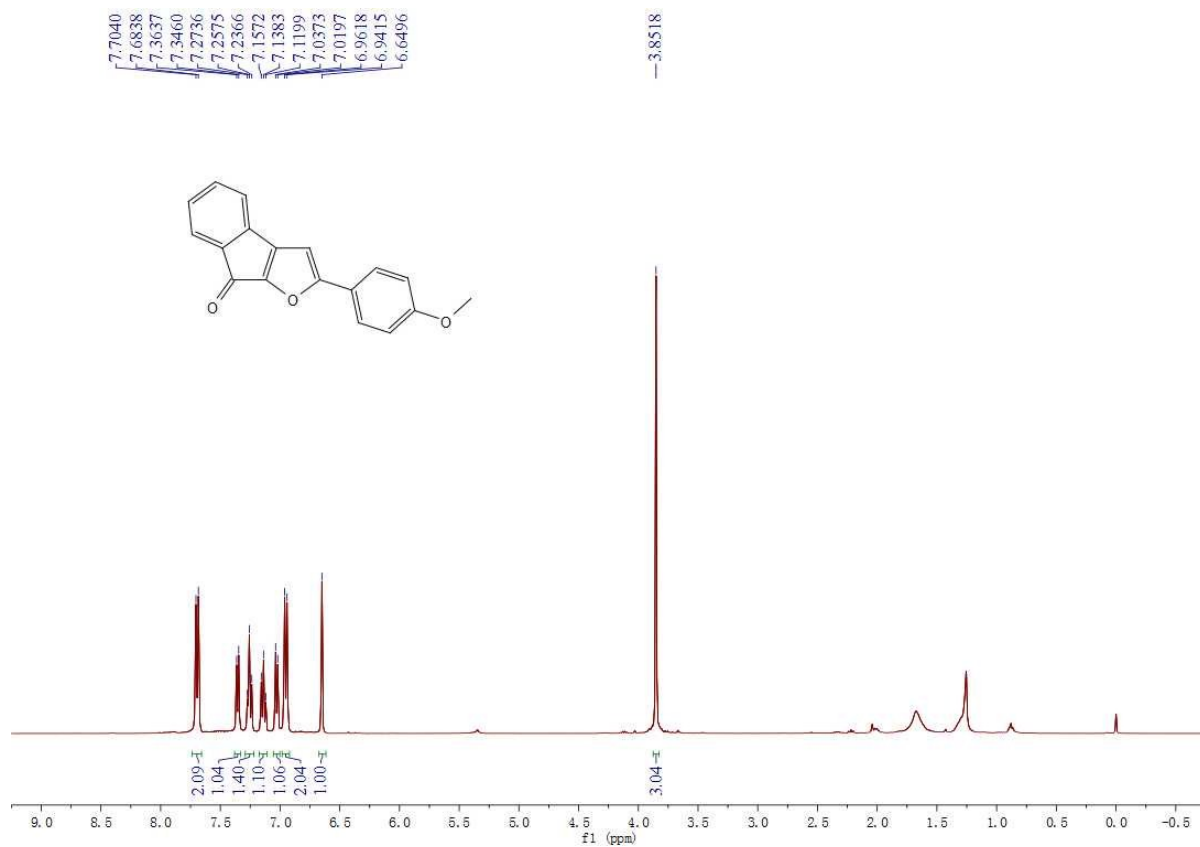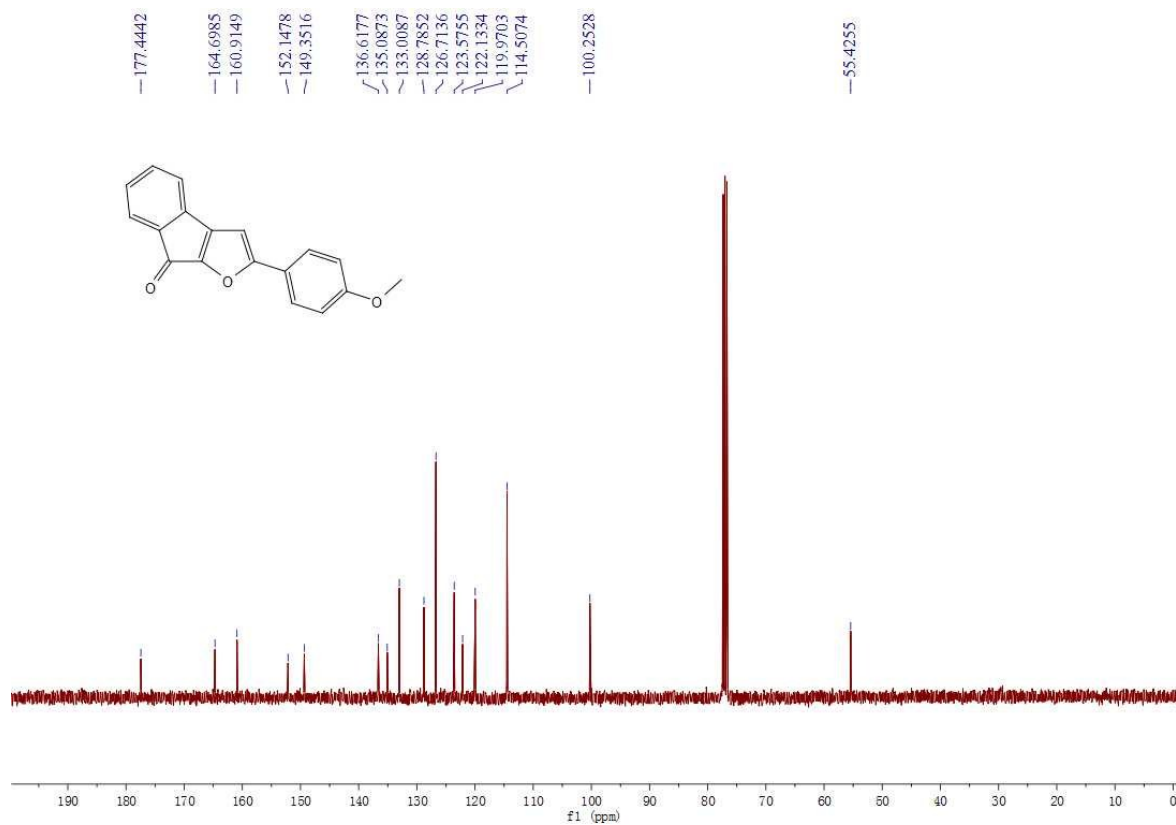

Supplement: c6qo00277c1.pdf [file c6qo00277c1.pdf]
